# Supplementary material for: Light-driven MPV-type reduction of aryl ketones/aldehydes to alcohols with isopropanol under mild conditions
Source: Royal Society of Chemistry journal article supplement (doi:10.1039/d1gc02449c), 2021-01-01

## Supporting Information

### Light-Driven MPV-Type Reduction of Aryl Ketones/Aldehydes to Alcohols with Isopropanol under Mild Conditions

Dawei Cao, Shumei Xia, Pan Pan, Huiying Zeng\*, Chao-Jun Li\*, and Yong Peng\*

#### Table of Contents

- I . General methods
- II . General experimental procedure and spectroscopic data of products
- III. References
- IV. Copies of  $^1\text{H}$  NMR and  $^{13}\text{C}$  NMR

## I . General methods

All reagents and solvents were purchased from commercial sources (Alfa, Acros, Aldrich, TCI and Combi-Blocks), and used without further purification unless otherwise stated.  $^1\text{H}$ ,  $^{19}\text{F}$  and  $^{13}\text{C}$  NMR spectra were taken on Bruker 400 or 500 MHz spectrometer. Chemical shifts of  $^1\text{H}$  NMR spectra were reported using either residual solvent signal of  $\text{CDCl}_3$  ( $\delta = 7.26$  ppm) or TMS ( $\delta = 0.00$  ppm) as internal standard. Chemical shifts of  $^{13}\text{C}$  NMR spectra were reported using residual solvent signal of  $\text{CDCl}_3$  ( $\delta = 77.16$  ppm) as internal standard. The peak patterns are indicated as follows: s, singlet; d, doublet; dd, doublet of doublet; t, triplet; q, quartet; m, multiplet. The coupling constants,  $J$ , are reported in Hertz (Hz). All reactions were monitored by thin-layer chromatography (TLC). Column chromatography was performed on silica gel (200-300 mesh) and visualized with ultraviolet light. Hydrazinehydrate- $\text{d}_6$  was purchased from Toronto Research Chemicals. EI-MS was obtained from the Agilent GC-MS system. All solvents were purified and dried by standard techniques.

## II . General experimental procedure and spectroscopic data of products

In a 15 mL quartz tube charged with a magnetic stir-bar, ketones/aldehydes (0.1 mmol, 1 equiv),  $t\text{-BuOLi}$  (0.15 mmol, 1.5 equiv) and  $i\text{-PrOH}$  (1.5 mL) were added sequentially under air. Then the tube was placed in a UV reactor<sup>1</sup> at room temperature and the mixture was stirred for 24 or 36 h. 10 mL water was added to quench reaction, and the mixture was extracted with EtOAc (5 mL  $\times$  4). The combined organic solvent was washed with brine, dried with  $\text{Na}_2\text{SO}_4$ , and then concentrated under reduced pressure. The residue was purified by preparative TLC on silica gel eluting with hexane: EtOAc (100:1-2:1) to afford the product.

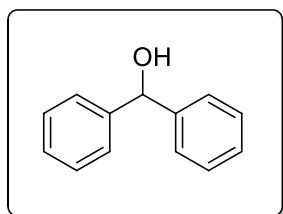

### Diphenylmethanol (CAS: 103-29-7)<sup>2</sup>

$^1\text{H NMR}$  ( $\text{CDCl}_3$ , 400 MHz)  $\delta$ : 7.43 – 7.35 (m, 8H), 7.32 – 7.28 (m, 2H), 5.88 (d,  $J = 3.5$  Hz, 1H), 2.24 (d,  $J = 3.6$  Hz, 1H).

$^{13}\text{C NMR}$  ( $\text{CDCl}_3$ , 101 MHz)  $\delta$ : 143.8, 128.5, 127.6, 126.5, 76.3.

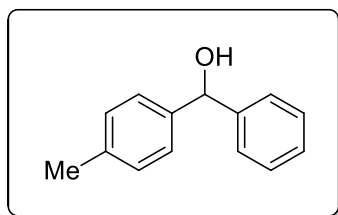

### Phenyl(p-tolyl)methanol (CAS: 1517-63-1)<sup>2</sup>

$^1\text{H NMR}$  ( $\text{CDCl}_3$ , 400 MHz)  $\delta$ : 7.43 – 7.34 (m, 4H), 7.29 (d,  $J = 7.5$  Hz, 3H), 7.18 (d,  $J = 7.9$  Hz,

2H), 5.84 (s, 1H), 2.36 (s, 3H), 2.22 (s, 1H).

$^{13}\text{C}$  NMR ( $\text{CDCl}_3$ , 101 MHz)  $\delta$ : 143.9, 140.9, 137.3, 129.2, 128.4, 127.4, 126.5, 126.4, 76.1, 21.1.

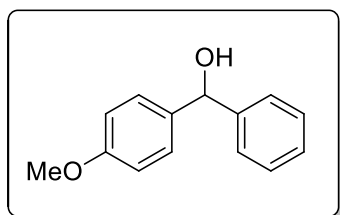

**(4-Methoxyphenyl)(phenyl)methanol (CAS: 720-44-5)**<sup>2</sup>

$^1\text{H}$  NMR ( $\text{CDCl}_3$ , 400 MHz)  $\delta$ : 7.42 – 7.29 (m, 7H), 6.92 – 6.87 (m, 2H), 5.84 (d,  $J$  = 3.5 Hz, 1H), 3.82 (s, 3H), 2.19 (d,  $J$  = 3.6 Hz, 1H).

$^{13}\text{C}$  NMR ( $\text{CDCl}_3$ , 101 MHz)  $\delta$ : 159.0, 144.0, 136.140, 128.420, 127.9, 127.4, 126.4, 113.9, 75.8, 55.3.

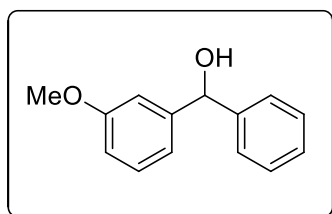

**(3-Methoxyphenyl)(phenyl)methanol (CAS: 13391-45-2)**<sup>3</sup>

$^1\text{H}$  NMR ( $\text{CDCl}_3$ , 400 MHz)  $\delta$ : 7.43 – 7.34 (m, 4H), 7.29 (ddd,  $J$  = 14.4, 6.7, 4.9 Hz, 2H), 6.98 (t,  $J$  = 4.5 Hz, 2H), 6.87 – 6.80 (m, 1H), 5.83 (s, 1H), 3.81 (s, 3H), 2.32 (s, 1H).

$^{13}\text{C}$  NMR ( $\text{CDCl}_3$ , 101 MHz)  $\delta$ : 159.7, 145.4, 143.6, 129.5, 128.5, 127.6, 126.5, 118.9, 112.9, 112.1, 76.1, 55.2.

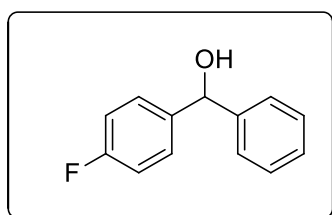

**(4-Fluorophenyl)(phenyl)methanol (CAS: 365-22-0)**<sup>2</sup>

$^1\text{H}$  NMR ( $\text{CDCl}_3$ , 400 MHz)  $\delta$ : 7.40 – 7.30 (m, 7H), 7.08 – 7.01 (m, 2H), 5.85 (s, 1H), 2.29 (s, 1H).

$^{13}\text{C}$  NMR ( $\text{CDCl}_3$ , 101 MHz)  $\delta$ : 162.1 (d,  $J^{\text{F}}$  = 245.9 Hz), 143.6, 139.5, 139.51, 128.6, 128.2 (d,  $J^{\text{F}}$  = 8.1 Hz), 127.7, 126.4, 75.6, 115.3 (d,  $J^{\text{F}}$  = 21.4 Hz).

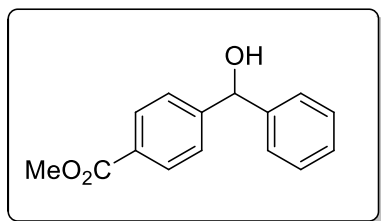

**Methyl 4-(hydroxy(phenyl)methyl)benzoate (CAS: 108475-89-4)**<sup>2</sup>

**<sup>1</sup>H NMR (CDCl<sub>3</sub>, 400 MHz)** δ: 8.03 (d, *J* = 8.3 Hz, 2H), 7.49 (d, *J* = 8.2 Hz, 2H), 7.41 – 7.29 (m, 5H), 5.91 (s, 1H), 3.92 (s, 3H), 2.38 (s, 1H).

**<sup>13</sup>C NMR (CDCl<sub>3</sub>, 101 MHz)** δ: 166.9, 148.6, 143.2, 129.8, 129.3, 128.7, 128.0, 126.6, 126.3, 75.9, 52.1.

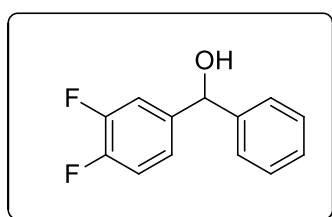

**(3,4-Difluorophenyl)(phenyl)methanol (CAS: 182192-93-4)**<sup>4</sup>

**<sup>1</sup>H NMR (CDCl<sub>3</sub>, 400 MHz)** δ: 7.40 – 7.30 (m, 5H), 7.27 – 7.21 (m, 1H), 7.16 – 7.08 (m, 2H), 5.81 (s, 1H), 2.34 (s, 1H).

**<sup>13</sup>C NMR (CDCl<sub>3</sub>, 101 MHz)** δ: 150.3 (dd, *J<sub>F</sub>* = 249.5, 13.1 Hz), 149.7 (dd, *J<sub>F</sub>* = 248.5, 12.1 Hz), 143.1, 140.7 (dd, *J<sub>F</sub>* = 4.8, 3.7 Hz), 128.7, 128.1, 126.5, 122.4 (dd, *J<sub>F</sub>* = 6.3, 3.6 Hz), 117.1 (d, *J<sub>F</sub>* = 17.2 Hz), 115.5 (d, *J<sub>F</sub>* = 17.9 Hz), 75.2.

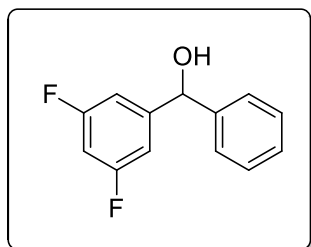

**(3,5-Difluorophenyl)(phenyl)methanol (CAS: 182192-93-4)**<sup>5</sup>

**<sup>1</sup>H NMR (CDCl<sub>3</sub>, 400 MHz)** δ: 7.41 – 7.32 (m, 5H), 6.98 – 6.92 (m, 2H), 6.71 (tt, *J* = 8.8, 2.2 Hz, 1H), 5.80 (s, 1H), 2.36 (s, 1H).

**<sup>13</sup>C NMR (CDCl<sub>3</sub>, 101 MHz)** δ: 163.1 (d, *J<sub>F</sub>* = 249.5), 162.9 (d, *J<sub>F</sub>* = 249.5), 147.7, 142.8, 128.8, 128.3, 126.6, 109.3 (d, *J<sub>F</sub>* = 26.3 Hz), 109.2 (d, *J<sub>F</sub>* = 12.1 Hz), 102.7 (t, *J<sub>F</sub>* = 25.3 Hz), 75.4.

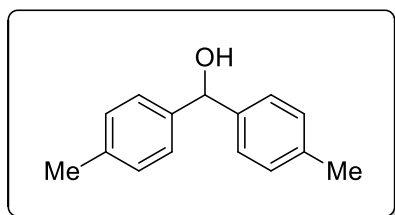

**Di-p-tolylmethanol (CAS: 885-77-8)** <sup>2</sup>

**<sup>1</sup>H NMR (CDCl<sub>3</sub>, 400 MHz)** δ: 7.29 – 7.27 (m, 4H), 7.16 (d, *J* = 7.9 Hz, 4H), 5.82 (d, *J* = 3.4 Hz, 1H), 2.35 (s, 6H), 2.13 (d, *J* = 3.6 Hz, 1H).

**<sup>13</sup>C NMR (CDCl<sub>3</sub>, 101 MHz)** δ: 141.1, 137.1, 129.1, 126.4, 75.9, 21.1.

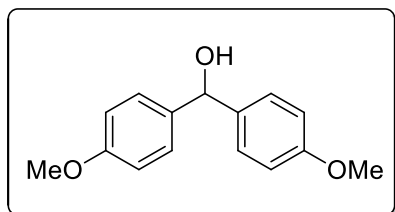

**Bis(4-methoxyphenyl)methanol (CAS: 728-87-0)** <sup>6</sup>

**<sup>1</sup>H NMR (CDCl<sub>3</sub>, 400 MHz)** δ: 7.33 – 7.28 (m, 4H), 6.92 – 6.86 (m, 4H), 5.80 (d, *J* = 3.5 Hz, 1H), 3.82 (s, 6H), 2.10 (d, *J* = 3.5 Hz, 1H).

**<sup>13</sup>C NMR (CDCl<sub>3</sub>, 101 MHz)** δ: 159.0, 136.4, 127.7, 113.8, 75.4, 55.3.

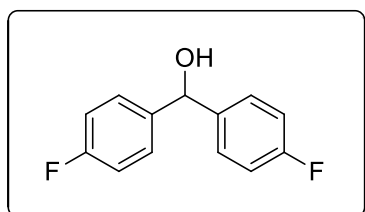

**Bis(4-fluorophenyl)methanol (CAS: 365-24-2)** <sup>7</sup>

**<sup>1</sup>H NMR (CDCl<sub>3</sub>, 400 MHz)** δ: 7.38 – 7.31 (m, 4H), 7.09 – 7.01 (m, 4H), 5.82 (s, 1H), 2.35 (s, 1H).

**<sup>13</sup>C NMR (CDCl<sub>3</sub>, 101 MHz)** δ: 163.4, 161.0, 139.4 (d, *J<sup>F</sup>* = 3.3 Hz), 128.1 (d, *J<sup>F</sup>* = 8.1 Hz), 115.36 (d, *J<sup>F</sup>* = 21.4 Hz), 74.9.

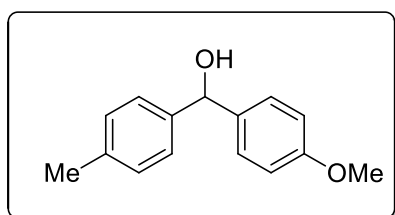

**(4-Methoxyphenyl)(p-tolyl)methanol (CAS: 838-22-2)** <sup>2</sup>

**<sup>1</sup>H NMR (CDCl<sub>3</sub>, 400 MHz)** δ: 7.30 (ddd, *J* = 11.7, 6.4, 3.7 Hz, 4H), 7.17 (d, *J* = 8.0 Hz, 2H), 6.91 – 6.87 (m, 2H), 5.80 (s, 1H), 3.82 (s, 3H), 2.37 (s, 3H), 2.24 (s, 1H).

**<sup>13</sup>C NMR (CDCl<sub>3</sub>, 101 MHz)** δ: 158.9, 141.1, 137.1, 136.3, 129.1, 127.8, 126.3, 113.8, 75.6, 55.2, 21.1.

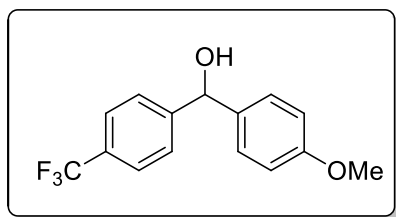

**(4-Methoxyphenyl)(4-(trifluoromethyl)phenyl)methanol (CAS: 87901-71-1)** <sup>8</sup>

**<sup>1</sup>H NMR (CDCl<sub>3</sub>, 400 MHz)** δ: 7.61 (d, *J* = 8.3 Hz, 2H), 7.53 (d, *J* = 8.4 Hz, 2H), 7.30 – 7.27 (m, 2H), 6.92 – 6.88 (m, 2H), 5.87 (s, 1H), 3.82 (s, 3H), 2.27 (s, 1H).

**<sup>13</sup>C NMR (CDCl<sub>3</sub>, 101 MHz)** δ: 159.4, 147.7, 135.5, 129.3 (q, *J<sub>F</sub>* = 23.2 Hz), 128.0, 126.5, 125.32 (q, *J<sub>F</sub>* = 3.8 Hz), 114.1, 75.3, 55.3.

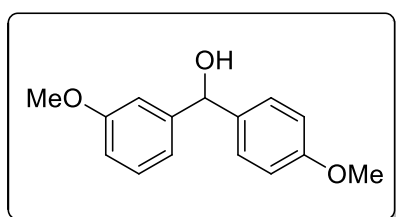

**(3-Methoxyphenyl)(4-methoxyphenyl)methanol (CAS: 120265-05-6)** <sup>9</sup>

**<sup>1</sup>H NMR (CDCl<sub>3</sub>, 400 MHz)** δ: 7.29 – 7.22 (m, 3H), 6.95 (d, *J* = 7.2 Hz, 2H), 6.87 (d, *J* = 8.6 Hz, 2H), 6.84 – 6.78 (m, 1H), 5.34 (s, 1H), 3.81 (s, 3H), 3.78 (s, 3H).

**<sup>13</sup>C NMR (CDCl<sub>3</sub>, 101 MHz)** δ: 159.6, 158.9, 144.26, 134.3, 129.3, 128.5, 119.6, 113.7, 112.7, 112.5, 79.4, 55.2, 55.2.

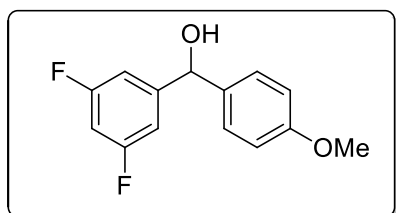

**(3,5-Difluorophenyl)(4-methoxyphenyl)methanol (CAS: 1282818-92-1)**

**<sup>1</sup>H NMR (CDCl<sub>3</sub>, 400 MHz)** δ: 7.28 – 7.24 (m, 2H), 6.92 (ddd, *J* = 8.8, 4.5, 1.9 Hz, 4H), 6.70 (tt, *J* = 8.9, 2.3 Hz, 1H), 5.75 (s, 1H), 3.82 (s, 3H), 2.39 (s, 1H).

**<sup>13</sup>C NMR (CDCl<sub>3</sub>, 101 MHz)** δ: 163.0 (d, *J<sub>F</sub>* = 249.5), 162.9 (d, *J<sub>F</sub>* = 249.5), 159.5, 148.0 (t, *J<sub>F</sub>* = 8.1), 135.1, 128.0, 114.1, 109.1 (d, *J<sub>F</sub>* = 25.3 Hz), 109.0 (d, *J<sub>F</sub>* = 12.1 Hz), 102.3 (t, *J<sub>F</sub>* = 25.3 Hz), 74.9, 55.3.

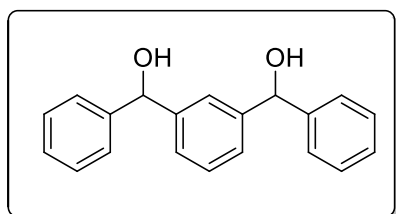

**1,3-Phenylenebis(phenylmethanol) (CAS: 36323-32-7)** <sup>10</sup>

**<sup>1</sup>H NMR (CDCl<sub>3</sub>, 400 MHz)** δ: 7.50 (d, *J* = 6.1 Hz, 1H), 7.39 – 7.34 (m, 8H), 7.31 – 7.27 (m, 5H), 5.85 (s, 2H), 2.27 (s, 2H).

**<sup>13</sup>C NMR (CDCl<sub>3</sub>, 101 MHz)** δ: 144.1, 143.7, 128.7, 128.5, 127.6, 126.6, 125.7, 124.7, 76.2.

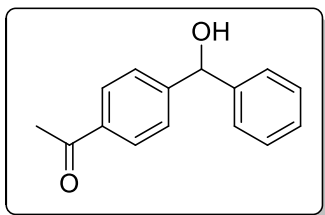

**1-(4-(Hydroxy(phenyl)methyl)phenyl)ethanone (CAS: 94705-09-6)**<sup>11</sup>

**<sup>1</sup>H NMR (CDCl<sub>3</sub>, 400 MHz)** δ: 7.94 (d, *J* = 8.4 Hz, 2H), 7.51 (d, *J* = 8.4 Hz, 2H), 7.42 – 7.29 (m, 5H), 5.90 (s, 1H), 2.59 (s, 3H), 2.55 (s, 1H).

**<sup>13</sup>C NMR (CDCl<sub>3</sub>, 101 MHz)** δ: 197.9, 148.9, 143.2, 136.2, 128.7, 128.5, 128.0, 126.6, 126.5, 75.8, 26.6.

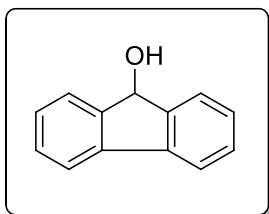

**9H-fluoren-9-ol (CAS: 1689-64-1)**<sup>12</sup>

**<sup>1</sup>H NMR (CDCl<sub>3</sub>, 400 MHz)** δ: 7.71 – 7.65 (m, 4H), 7.42 (td, *J* = 7.4, 0.7 Hz, 2H), 7.35 (td, *J* = 7.4, 1.1 Hz, 2H), 5.62 (d, *J* = 9.9 Hz, 1H), 1.84 (d, *J* = 10.0 Hz, 1H).

**<sup>13</sup>C NMR (CDCl<sub>3</sub>, 101 MHz)** δ: 145.6, 140.0, 129.1, 127.8, 125.1, 120.0, 75.2.

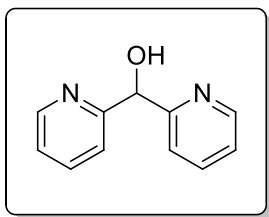

**Di(pyridin-2-yl)methanol (CAS: 35047-29-1)**<sup>13</sup>

**<sup>1</sup>H NMR (CDCl<sub>3</sub>, 400 MHz)** δ: 8.54 (dd, *J* = 3.1, 1.3 Hz, 2H), 7.70 – 7.61 (m, 2H), 7.53 (d, *J* = 7.9 Hz, 2H), 7.22 – 7.12 (m, 2H), 5.90 (s, 1H), 5.87 (s, 1H).

**<sup>13</sup>C NMR (CDCl<sub>3</sub>, 101 MHz)** δ: 160.7, 148.2, 136.9, 122.6, 121.2, 75.2.

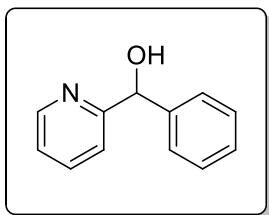

**Phenyl(pyridin-2-yl)methanol (CAS: 14159-57-0)** <sup>14</sup>

**<sup>1</sup>H NMR (CDCl<sub>3</sub>, 400 MHz)** δ: 8.63 – 8.57 (m, 1H), 7.64 (td, *J* = 7.7, 1.7 Hz, 1H), 7.44 – 7.34 (m, 4H), 7.31 (dt, *J* = 5.5, 2.2 Hz, 1H), 7.25 – 7.20 (m, 1H), 7.17 (dd, *J* = 7.9, 0.6 Hz, 1H), 5.78 (d, *J* = 4.3 Hz, 1H), 5.29 (d, *J* = 4.4 Hz, 1H).

**<sup>13</sup>C NMR (CDCl<sub>3</sub>, 101 MHz)** δ: 160.8, 147.8, 143.2, 136.8, 128.6, 127.8, 127.1, 122.4, 121.4, 74.9.

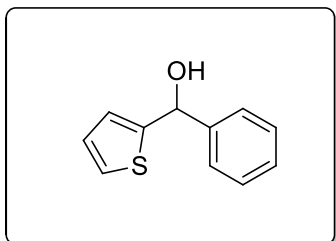

**Phenyl(thiophen-2-yl)methanol (CAS: 26059-21-2)** <sup>2</sup>

**<sup>1</sup>H NMR (CDCl<sub>3</sub>, 400 MHz)** δ: 7.48 (dd, *J* = 5.3, 3.5 Hz, 2H), 7.44 – 7.38 (m, 2H), 7.38 – 7.32 (m, 1H), 7.32 – 7.27 (m, 1H), 6.98 (dd, *J* = 5.0, 3.5 Hz, 1H), 6.93 – 6.89 (m, 1H), 6.07 (s, 1H), 2.59 (d, *J* = 4.0 Hz, 1H).

**<sup>13</sup>C NMR (CDCl<sub>3</sub>, 101 MHz)** δ: 148.1, 143.1, 128.5, 128.0, 126.6, 126.3, 125.4, 124.8, 72.4.

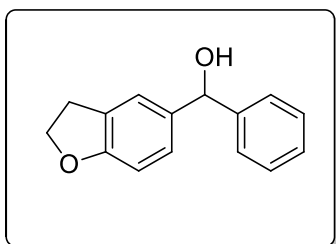

**(2,3-Dihydrobenzofuran-5-yl)(phenyl)methanol (CAS: 81390-92-3)** <sup>15</sup>

**<sup>1</sup>H NMR (CDCl<sub>3</sub>, 400 MHz)** δ: 7.43 – 7.34 (m, 4H), 7.29 (ddd, *J* = 7.0, 5.2, 1.4 Hz, 1H), 7.21 (s, 1H), 7.13 (dd, *J* = 8.2, 1.1 Hz, 1H), 6.76 (d, *J* = 8.2 Hz, 1H), 5.81 (s, 1H), 4.57 (t, *J* = 8.7 Hz, 2H), 3.19 (t, *J* = 8.7 Hz, 2H), 2.22 (s, 1H).

**<sup>13</sup>C NMR (CDCl<sub>3</sub>, 101 MHz)** δ: 159.6, 144.1, 136.2, 128.4, 127.4, 127.3, 126.8, 126.3, 123.4, 109.0, 76.0, 71.3, 29.7.

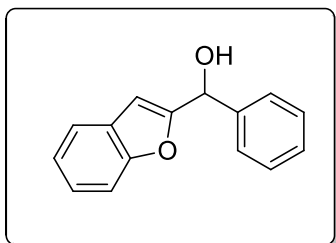

**Benzofuran-2-yl(phenyl)methanol (CAS: 27052-21-7)** <sup>16</sup>

**<sup>1</sup>H NMR (CDCl<sub>3</sub>, 400 MHz)** δ: 7.57 – 7.50 (m, 3H), 7.49 – 7.37 (m, 4H), 7.31 – 7.22 (m, 2H), 6.56 (d, *J* = 0.8 Hz, 1H), 5.98 (d, *J* = 3.5 Hz, 1H), 2.65 (d, *J* = 3.7 Hz, 1H).



$^{13}\text{C}$  NMR ( $\text{CDCl}_3$ , 101 MHz)  $\delta$ : 158.5, 155.1, 140.2, 128.6, 128.4, 128.0, 126.8, 124.3, 122.8, 121.1, 111.3, 104.0, 70.6.

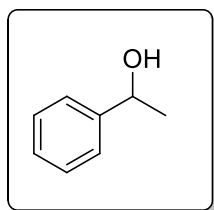

**1-Phenylethanol (CAS: 98-85-1)**<sup>17</sup>

$^1\text{H}$  NMR ( $\text{CDCl}_3$ , 400 MHz)  $\delta$ : 7.43 – 7.35 (m, 4H), 7.33 – 7.27 (m, 1H), 4.92 (q,  $J$  = 6.5 Hz, 1H), 2.04 (s, 1H), 1.52 (d,  $J$  = 6.5 Hz, 3H).

$^{13}\text{C}$  NMR ( $\text{CDCl}_3$ , 101 MHz)  $\delta$ : 145.8, 128.5, 127.4, 125.3, 70.4, 25.1.

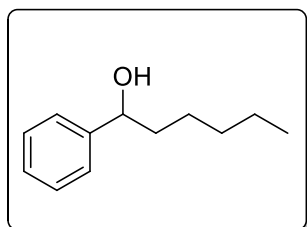

**1-Phenylhexan-1-ol (CAS: 4471-05-0)**<sup>18</sup>

$^1\text{H}$  NMR ( $\text{CDCl}_3$ , 400 MHz)  $\delta$ : 7.40 – 7.35 (m, 4H), 7.32 – 7.28 (m, 1H), 4.72 – 4.66 (m, 1H), 1.88 – 1.68 (m, 3H), 1.50 – 1.39 (m, 1H), 1.33 (dd,  $J$  = 5.0, 3.8 Hz, 5H), 0.90 (t,  $J$  = 7.0 Hz, 3H).

$^{13}\text{C}$  NMR ( $\text{CDCl}_3$ , 101 MHz)  $\delta$ : 144.9, 128.4, 127.5, 125.9, 74.7, 39.1, 31.7, 25.5, 22.6, 14.0.

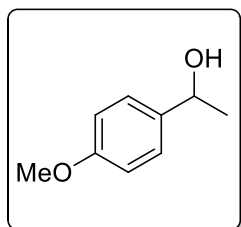

**1-(4-Methoxyphenyl)ethanol (CAS: 1517-70-0)**<sup>17</sup>

$^1\text{H}$  NMR ( $\text{CDCl}_3$ , 400 MHz)  $\delta$ : 7.32 (d,  $J$  = 8.6 Hz, 2H), 6.91 (d,  $J$  = 8.6 Hz, 2H), 4.88 (dd,  $J$  = 6.0, 3.8 Hz, 1H), 3.83 (s, 3H), 1.84 (s, 1H), 1.50 (d,  $J$  = 6.4 Hz, 3H).

$^{13}\text{C}$  NMR ( $\text{CDCl}_3$ , 101 MHz)  $\delta$ : 159.0, 138.0, 126.6, 113.8, 70.0, 55.3, 25.0.

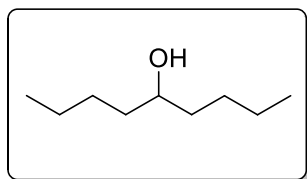

**5-Nonanol (CAS: 623-93-8)**<sup>19</sup>

$^1\text{H}$  NMR ( $\text{CDCl}_3$ , 400 MHz)  $\delta$ : 3.59 (s, 1H), 1.50 – 1.27 (m, 13H), 0.92 (t,  $J$  = 7.1 Hz, 6H).

$^{13}\text{C}$  NMR ( $\text{CDCl}_3$ , 101 MHz)  $\delta$ : 72.0, 37.2, 27.8, 22.8, 14.1.

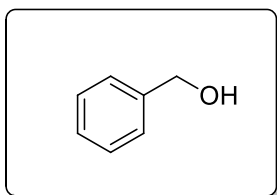

**Phenylmethanol (CAS: 100-51-6)**<sup>20</sup>

**<sup>1</sup>H NMR (CDCl<sub>3</sub>, 400 MHz)** δ: 7.46 – 7.30 (m, 5H), 4.71 (s, 2H), 1.93 (s, 1H).

**<sup>13</sup>C NMR (CDCl<sub>3</sub>, 101 MHz)** δ: 140.8, 128.5, 127.6, 127.0, 65.3.

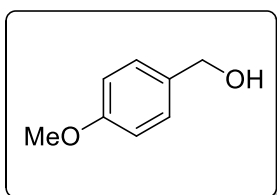

**(4-Methoxyphenyl)methanol (CAS: 105-13-5)**<sup>20</sup>

**<sup>1</sup>H NMR (CDCl<sub>3</sub>, 400 MHz)** δ: 7.29 (d, *J* = 8.3 Hz, 2H), 6.91 (d, *J* = 8.3 Hz, 2H), 4.61 (s, 2H), 3.82 (s, 3H), 1.97 (s, 1H).

**<sup>13</sup>C NMR (CDCl<sub>3</sub>, 101 MHz)** δ: 159.1, 133.1, 128.6, 113.9, 64.9, 55.2.

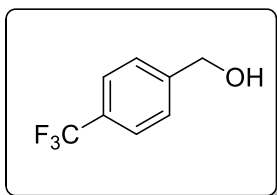

**(4-(Trifluoromethyl)phenyl)methanol (CAS: 349-95-1)**<sup>20</sup>

**<sup>1</sup>H NMR (CDCl<sub>3</sub>, 400 MHz)** δ: 7.63 (d, *J* = 8.1 Hz, 2H), 7.49 (d, *J* = 8.0 Hz, 2H), 4.77 (s, 2H), 2.14 (s, 1H).

**<sup>13</sup>C NMR (CDCl<sub>3</sub>, 101 MHz)** δ: 144.7, 129.9 (d, *J<sup>F</sup>* = 32.3 Hz), 126.8, 125.4 (q, *J<sup>F</sup>* = 3.0 Hz), 122.8, 64.4.

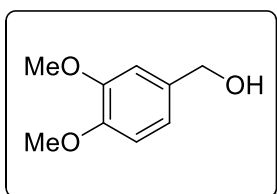

**(3,4-Dimethoxyphenyl)methanol (CAS: 93-03-8)**<sup>21</sup>

**<sup>1</sup>H NMR (CDCl<sub>3</sub>, 400 MHz)** δ: 6.96 – 6.83 (m, 3H), 4.63 (d, *J* = 5.4 Hz, 2H), 3.90 (s, 3H), 3.89 (s, 3H), 1.85 (s, 1H).

**<sup>13</sup>C NMR (CDCl<sub>3</sub>, 101 MHz)** δ: 149.0, 148.5, 133.5, 119.3, 111.0, 110.4, 65.2, 55.9, 55.8.

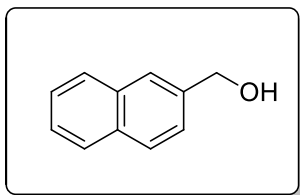

**Naphthalen-2-ylmethanol (CAS: 1592-38-7)** <sup>22</sup>

**<sup>1</sup>H NMR (CDCl<sub>3</sub>, 400 MHz)** δ: 7.91 – 7.78 (m, 4H), 7.58 – 7.45 (m, 3H), 4.87 (d, *J* = 5.8 Hz, 2H), 2.02 (s, 1H).

**<sup>13</sup>C NMR (CDCl<sub>3</sub>, 101 MHz)** δ: 138.3, 133.3, 132.9, 128.3, 127.8, 127.7, 126.1, 125.9, 125.4, 125.1, 65.4.

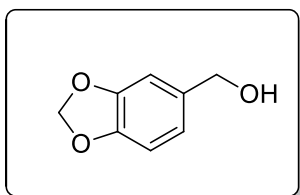

**Benzo[d][1,3]dioxol-5-ylmethanol (CAS: 495-76-1)** <sup>23</sup>

**<sup>1</sup>H NMR (CDCl<sub>3</sub>, 400 MHz)** δ: 1H NMR (400 MHz, CDCl<sub>3</sub>) δ 6.88 (s, 1H), 6.84-6.79 (m, 2H), 5.97 (d, *J* = 1.1 Hz, 2H), 4.59 (s, 2H), 1.89 (s, 1H).

**<sup>13</sup>C NMR (CDCl<sub>3</sub>, 101 MHz)** δ: 147.8, 147.0, 134.8, 120.5, 108.2, 107.8, 101.0, 65.2.

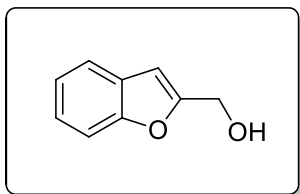

**Benzofuran-2-ylmethanol (CAS: 55038-01-2)** <sup>22</sup>

**<sup>1</sup>H NMR (CDCl<sub>3</sub>, 400 MHz)** δ: 7.59-7.48 (m, 2H), 7.33 – 7.22 (m, 2H), 6.68 (s, 1H), 4.79 (d, *J* = 3.7 Hz, 2H), 2.16 (s, 1H).

**<sup>13</sup>C NMR (CDCl<sub>3</sub>, 101 MHz)** δ: 156.4, 155.0, 128.1, 124.3, 122.8, 121.1, 111.2, 104.1, 58.1.

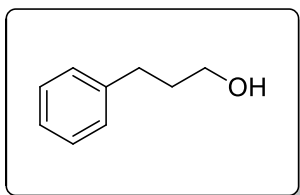

**3-Phenylpropan-1-ol (CAS: 122-97-4)** <sup>18</sup>

**<sup>1</sup>H NMR (CDCl<sub>3</sub>, 400 MHz)** δ: 7.34 – 7.28 (m, 2H), 7.27 – 7.19 (m, 3H), 3.71 (t, *J* = 6.4 Hz, 2H), 2.78 – 2.71 (m, 2H), 1.97 – 1.89 (m, 2H), 1.54 (br. s, 1H).

**<sup>13</sup>C NMR (CDCl<sub>3</sub>, 101 MHz)** δ: 141.8, 128.4, 128.4, 125.8, 62.2, 34.2, 32.0.

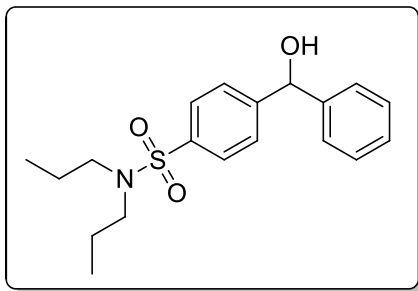

**4-(Hydroxy(phenyl)methyl)-N,N-dipropylbenzenesulfonamide**

**<sup>1</sup>H NMR (CDCl<sub>3</sub>, 400 MHz)** δ: 7.77 (d, *J* = 8.3 Hz, 2H), 7.54 (d, *J* = 8.2 Hz, 2H), 7.43 – 7.29 (m, 5H), 5.90 (s, 1H), 3.13 – 3.02 (m, 4H), 2.47 (d, *J* = 5.9 Hz, 1H), 1.57 (dd, *J* = 15.2, 7.5 Hz, 4H), 0.88 (t, *J* = 7.4 Hz, 6H).

**<sup>13</sup>C NMR (CDCl<sub>3</sub>, 101 MHz)** δ: 148.1, 143.1, 139.1, 128.8, 128.2, 127.2, 126.9, 126.7, 75.7, 50.2, 22.2, 11.2.

**HRMS (ESI)** calcd for C<sub>19</sub>H<sub>25</sub>NO<sub>3</sub>S [M + H<sup>+</sup>], 348.1628; found: 348.1624.

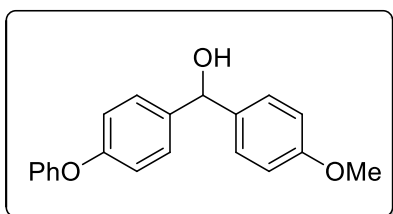

**(4-Methoxyphenyl)(4-phenoxyphenyl)methanol (CAS: 944695-97-0)**<sup>24</sup>

**<sup>1</sup>H NMR (CDCl<sub>3</sub>, 400 MHz)** δ: 7.41 – 7.30 (m, 6H), 7.14 (t, *J* = 7.4 Hz, 1H), 7.02 (dd, *J* = 13.8, 8.5 Hz, 4H), 6.92 (t, *J* = 5.7 Hz, 2H), 5.81 (s, 1H), 3.83 (s, 3H), 2.54 (s, 1H).

**<sup>13</sup>C NMR (CDCl<sub>3</sub>, 101 MHz)** δ: 159.0, 157.1, 156.5, 138.9, 136.1, 129.7, 127.9, 127.8, 123.2, 118.8, 118.7, 113.8, 75.3, 55.2.

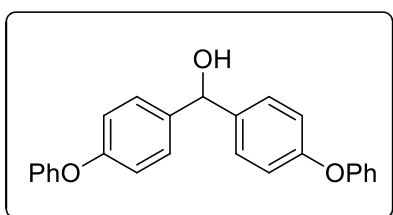

**Bis(4-phenoxyphenyl)methanol (CAS: 102893-98-1)**<sup>25</sup>

**<sup>1</sup>H NMR (CDCl<sub>3</sub>, 400 MHz)** δ: 7.41 – 7.34 (m, 8H), 7.14 (t, *J* = 7.4 Hz, 2H), 7.07 – 6.98 (m, 8H), 5.85 (s, 1H), 2.30 (s, 1H).

**<sup>13</sup>C NMR (CDCl<sub>3</sub>, 101 MHz)** δ: 157.0, 156.7, 138.6, 129.7, 128.0, 123.3, 119.0, 118.7, 75.3.

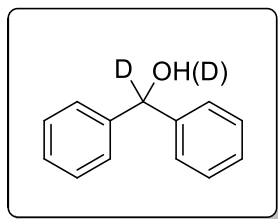

**d-2a**<sup>26-27</sup>

<sup>1</sup>H NMR (CDCl<sub>3</sub>, 400 MHz) δ: 7.42 – 7.34 (m, 8H), 7.33 – 7.26 (m, 2H).

<sup>13</sup>C NMR (CDCl<sub>3</sub>, 101 MHz) δ: 143.7, 128.5, 127.5, 126.5, 76.01(t, J = 22.2 Hz).

### III. References

1. D. Cao, Z. Chen, L. Lv, H. Zeng, Y. Peng and C.-J. Li, *iScience*, 2020, **23**, 101419.
2. R. N. Gaykar, A. Bhunia and A. T. Biju, *J. Org. Chem.*, 2018, **83**, 11333-11340.
3. J. Regier, R. Mailliet and Y. Bolshan, *Eur. J. Org. Chem.*, 2019, **2019**, 2390-2396.
4. T. D. Yarwood, A. J. Waring and P. L. Coe, *J. Fluor. Chem.*, 1996, **78**, 113-119.
5. C. Nolte and H. Mayr, *Eur. J. Org. Chem.*, 2010, **2010**, 01435-01439.
6. A. J. Plajer, L. Ahrens, M. Wieteck, D. M. Lustosa, R. Babaahmadi, B. Yates, A. Ariaferd, M. Rudolph, F. Rominger and A. S. K. Hashmi, *Chem. Eur. J.*, 2018, **24**, 10766-10772.
7. H. T. Ang, J. P. G. Rygus and D. G. Hall, *Org. Biomol. Chem.*, 2019, **17**, 6007-6014.
8. T. Zou, S.-S. Pi and J.-H. Li, *Org. Lett.*, 2009, **11**, 453-456.
9. M. Presset, J. Paul, G. N. Cherif, N. Ratnam, N. Laloi, E. Léonel, C. Gosmini and E. Le Gall, *Chem. Eur. J.*, 2019, **25**, 4491-4495.
10. M. Stępień and L. Latos-Grażyński, *Chem. Eur. J.*, 2001, **7**, 5113-5117.
11. S. Oi, M. Moro, H. Fukuhara, T. Kawanishi, Y. Inoue, *Tetrahedron*, 2003, **59**, 4351-4361.
12. S. N. Khan, M. K. Zaman, R. Li and Z. Sun, *J. Org. Chem.*, 2020, **85**, 5019-5026.
13. S. S. Klara, P. O. Saboe, I. T. Sines, M. Babaei, P.-L. Chiu, R. DeZorzi, K. Dayal, T. Walz, M. Kumar and M. S. Mauter, *J. Am. Chem. Soc.*, 2016, **138**, 28-31.
14. Y. Liu, Y. Yu, C. Sun, Y. Fu, Z. Mang, L. Shi and H. Li, *Org. Lett.*, 2020, **22**, 8127-8131.
15. D. P. Kelly and M. J. Jenkins, *J. Org. Chem.*, 1984, **49**, 409-413.
16. Q. Xuan, W. Kong and Q. Song, *J. Org. Chem.*, 2017, **82**, 7602-7607.
17. M. L. Shegavi, A. Baishya, K. Geetharani and S. K. Bose, *Org. Chem. Front.*, 2018, **5**, 3520-3525.
18. T. Yamakawa, H. Kinoshita and K. Miura, *J. Organomet. Chem.*, 2013, **724**, 129-134.
19. G. Amberchan, R. A. Snelling, E. Moya, M. Landi, K. Lutz, R. Gatihi, and B. Singaram, *J. Org. Chem.* 2021, **86**, 6207-6227.
20. G. Zhang, J. Cheng, K. Davis, M. G. Bonifacio and C. Zajaczkowski, *Green Chem.*, 2019, **21**, 1114-1121.
21. B. Dhokale, A. Susarrey-Arce, A. Pekkari, A. Runemark, K. Moth-Poulsen, C. Langhammer, H. Härelind, M. Busch, M. Vandichel and H. Sundén, *ChemCatChem*, 2020, **12**, 6344-6355.
22. Y. Okuda, M. Nagaoka and T. Yamamoto, *ChemCatChem*, 2020, **12**, 6291-6300.
23. J. Wu, H. Zeng, J. Cheng, S. Zheng, J. A. Golen, D. R. Manke and G. Zhang, *J. Org. Chem.*, 2018, **83**, 9442-9448.
24. E. S. Tan, E. S. Groban, M. P. Jacobson and T. S. Scanlan, *Chem. Biol.*, 2008, **15**, 343-353.
25. N. C. Deno and W. L. Evans, *J. Am. Chem. Soc.*, 1957, **79**, 5804-5807.

26. N. Zhu, M. Su, W.-M. Wan, Y. Li and H. Bao, *Org. Lett.*, 2020, **22**, 991-996.
27. R. Wang, X. Han, J. Xu, P. Liu and F. Li, *J. Org. Chem.*, 2020, **85**, 2242-2249.

#### IV. Copies of $^1\text{H}$ NMR, and $^{13}\text{C}$ NMR

$^1\text{H}$  and  $^{13}\text{C}$  NMR spectra of **diphenylmethanol**

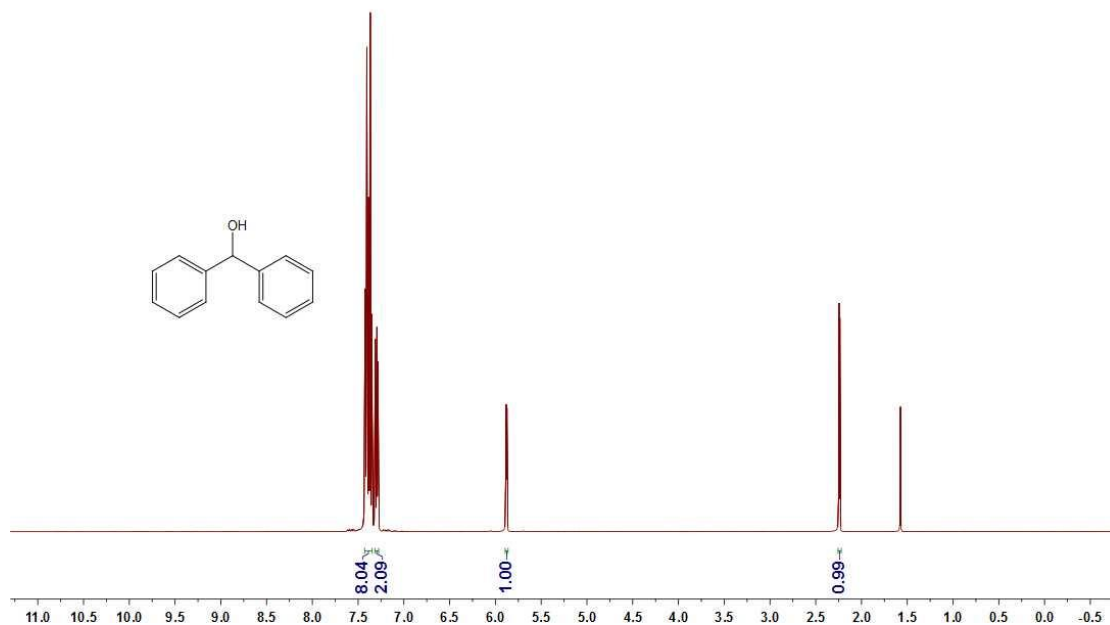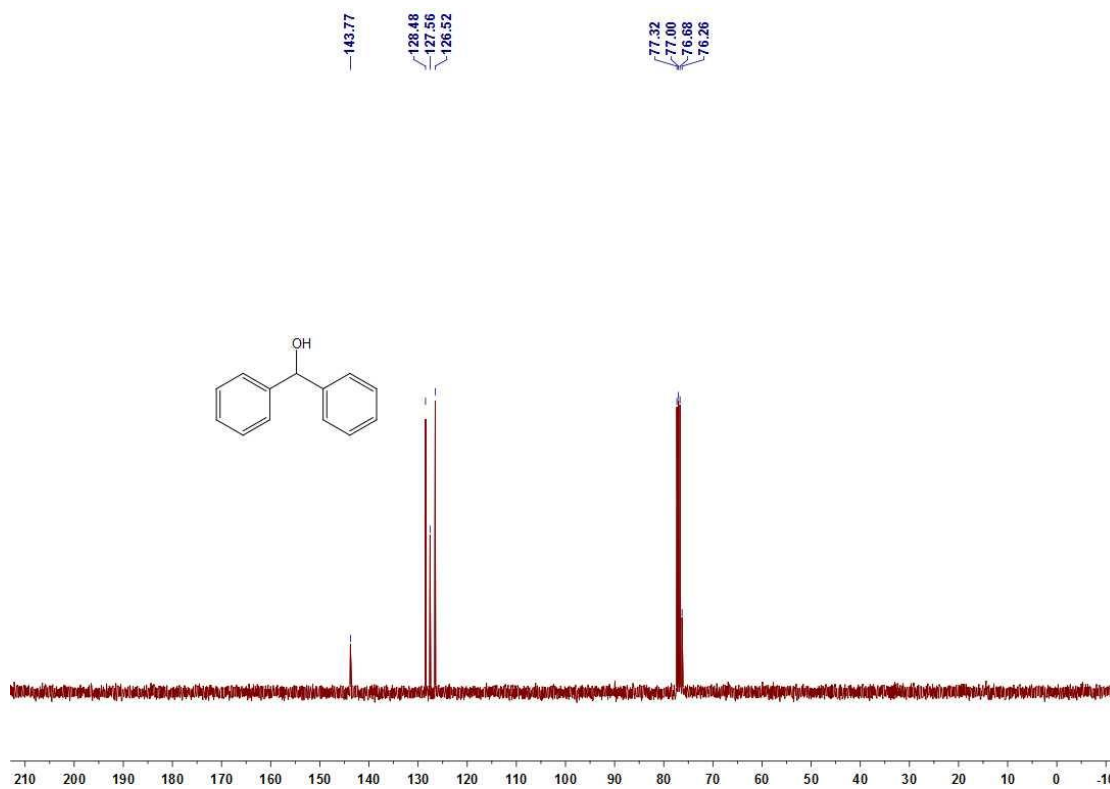

# $^1\text{H}$ and $^{13}\text{C}$ NMR spectra of phenyl(p-tolyl)methanol

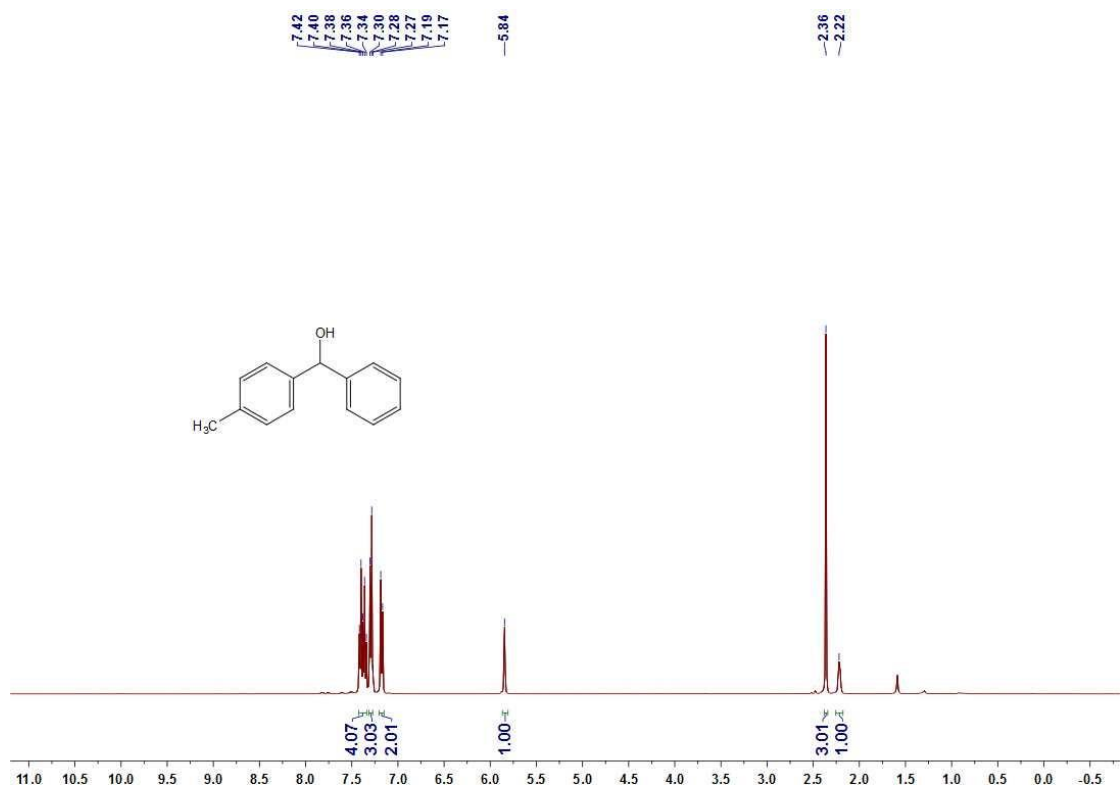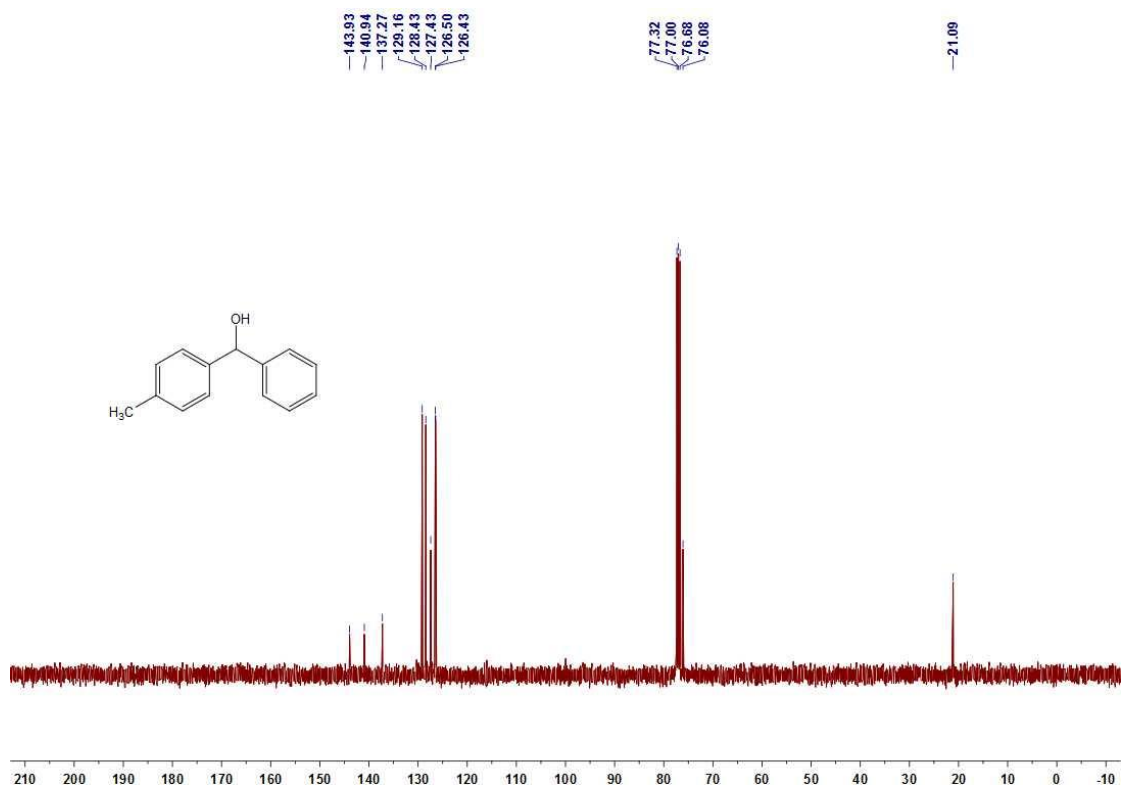



# $^1\text{H}$ and $^{13}\text{C}$ NMR spectra of (4-methoxyphenyl)(phenyl)methanol

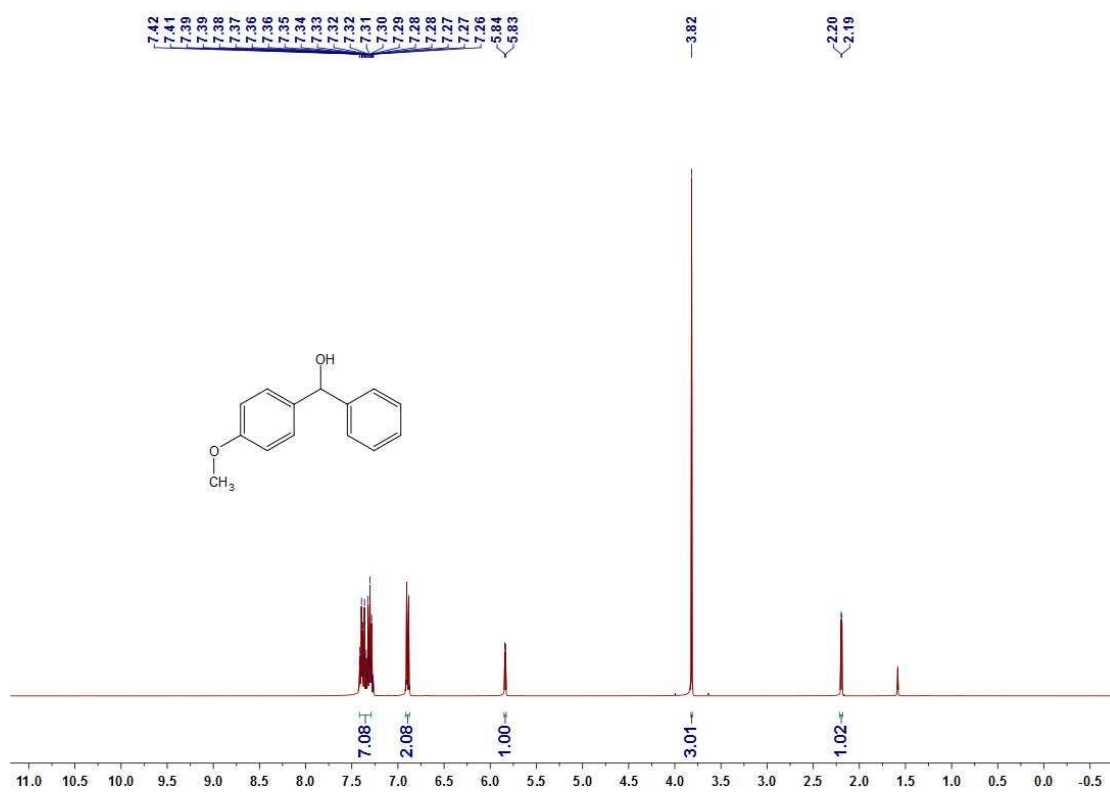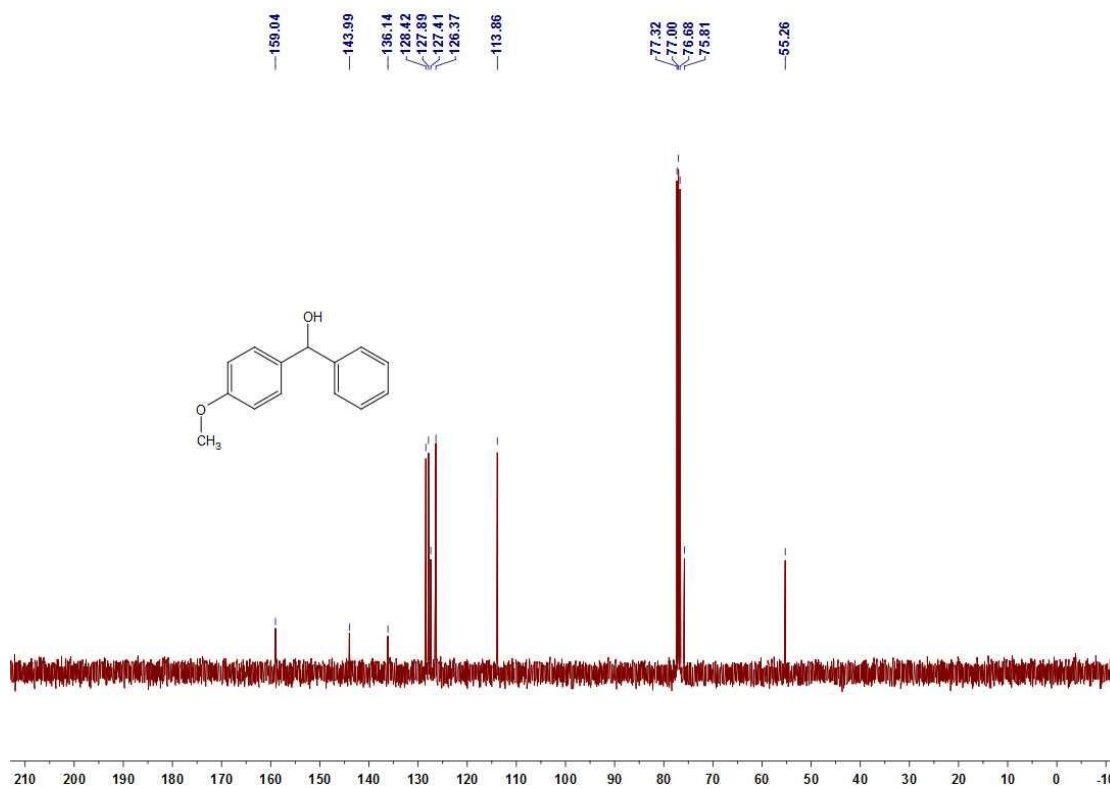

# $^1\text{H}$ and $^{13}\text{C}$ NMR spectra of (3-methoxyphenyl)(phenyl)methanol

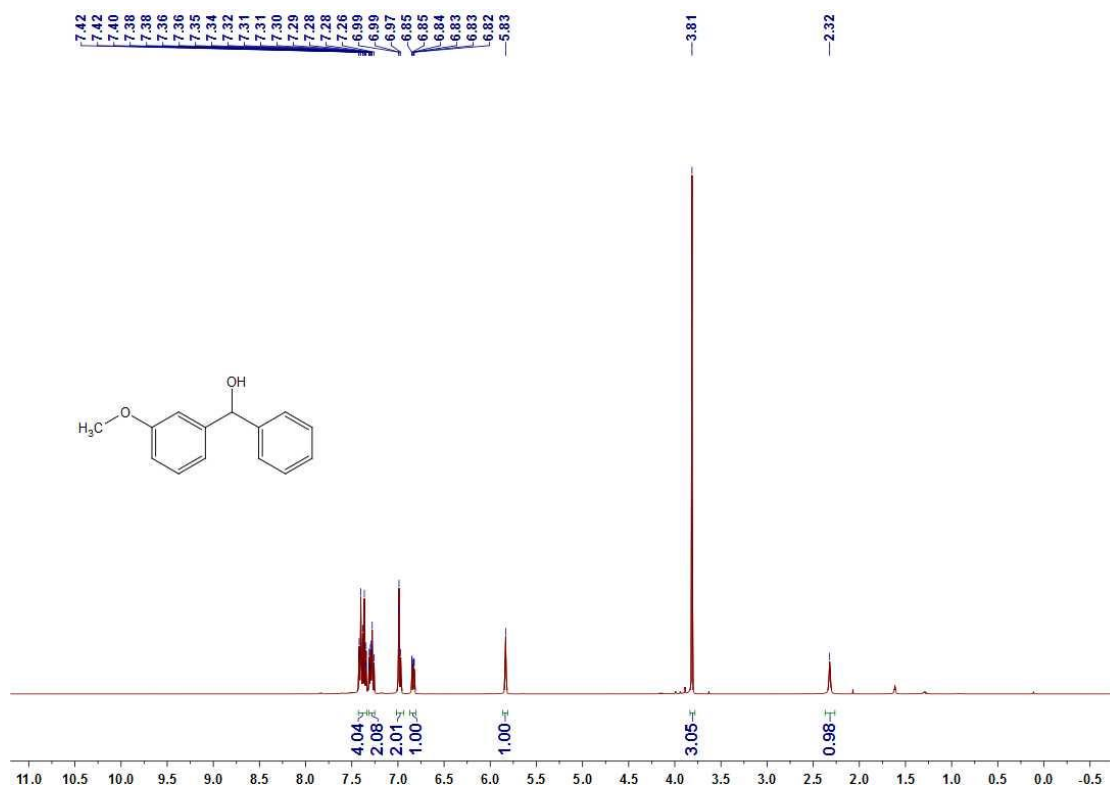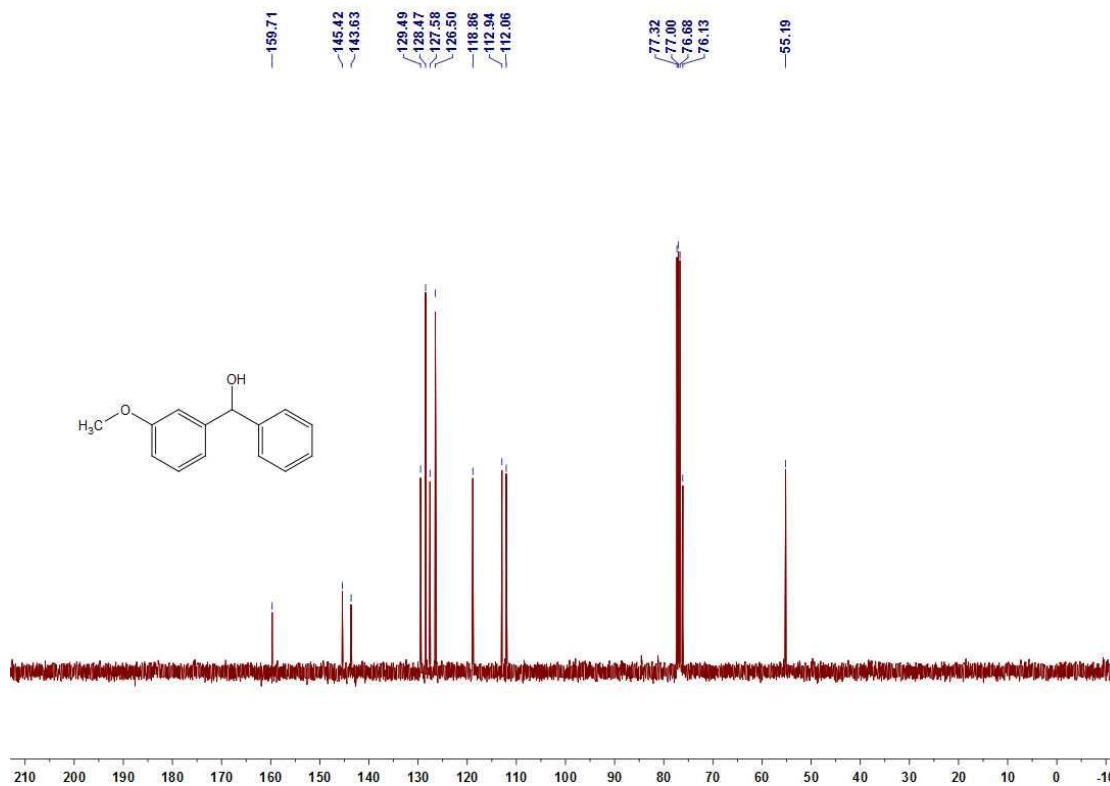

# $^1\text{H}$ and $^{13}\text{C}$ NMR spectra of (4-fluorophenyl)(phenyl)methanol

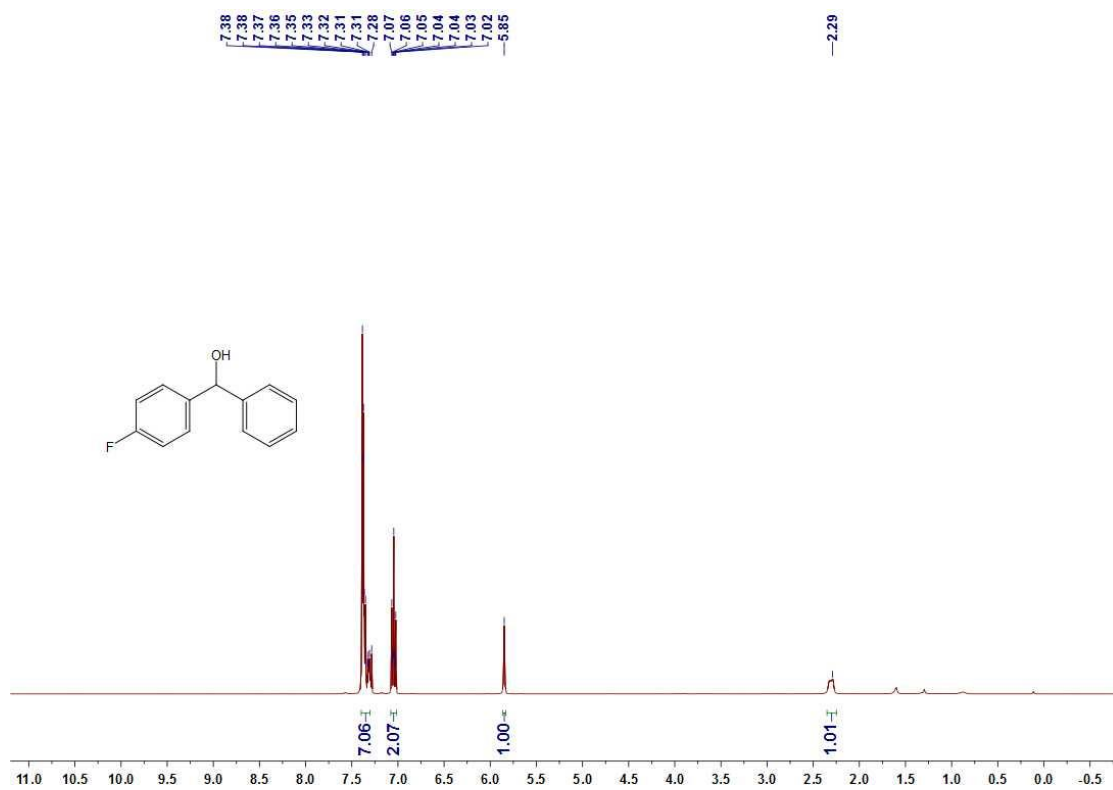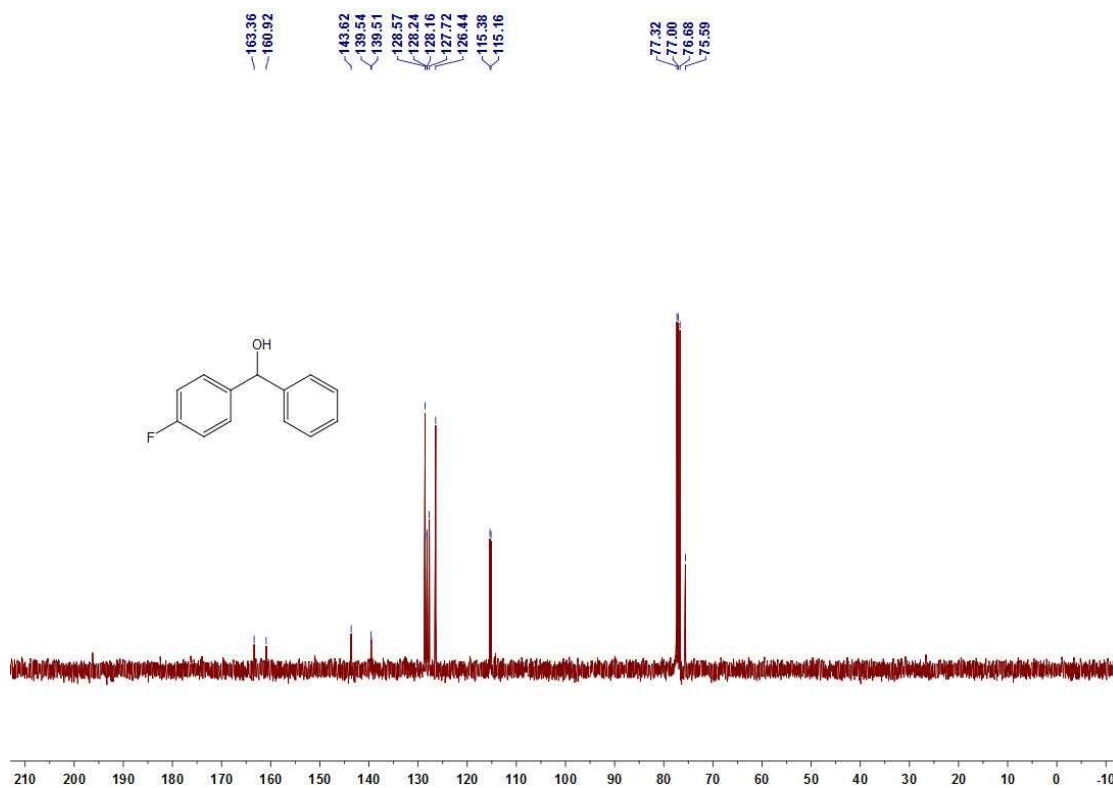

<sup>1</sup>H and <sup>13</sup>C NMR spectra of methyl 4-(hydroxy(phenyl)methyl)benzoate

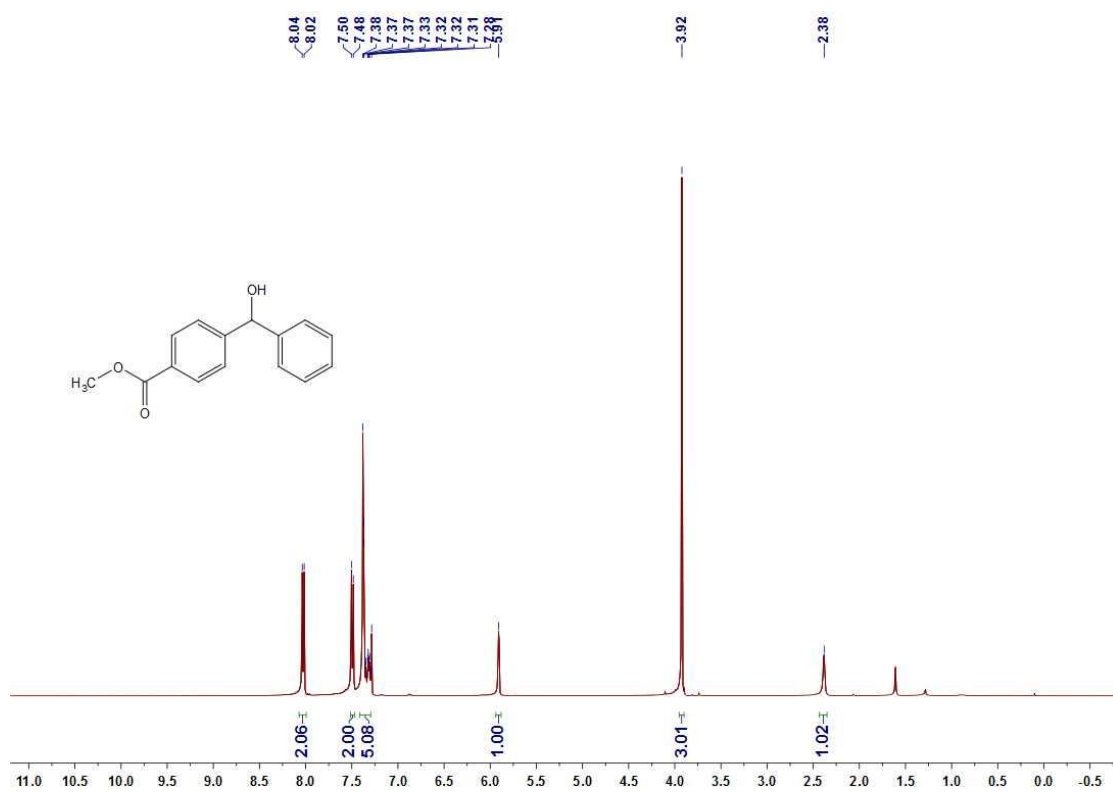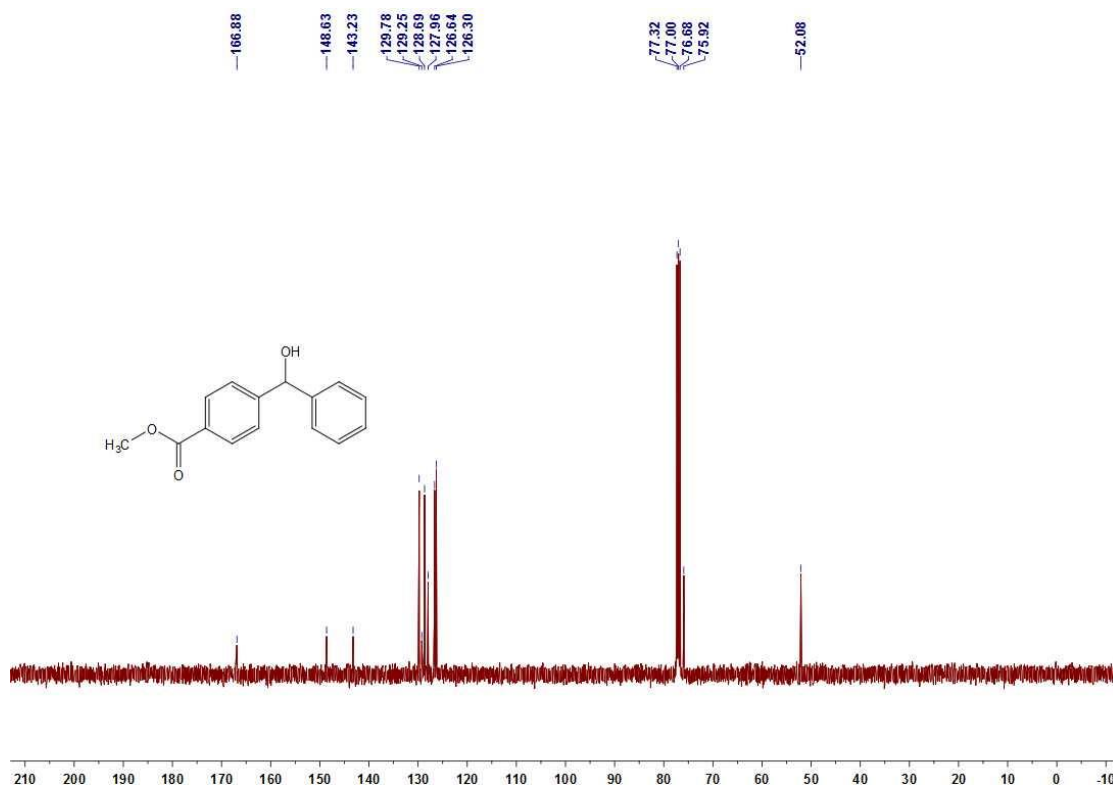

<sup>1</sup>H and <sup>13</sup>C NMR spectra of (3,4-difluorophenyl)(phenyl)methanol

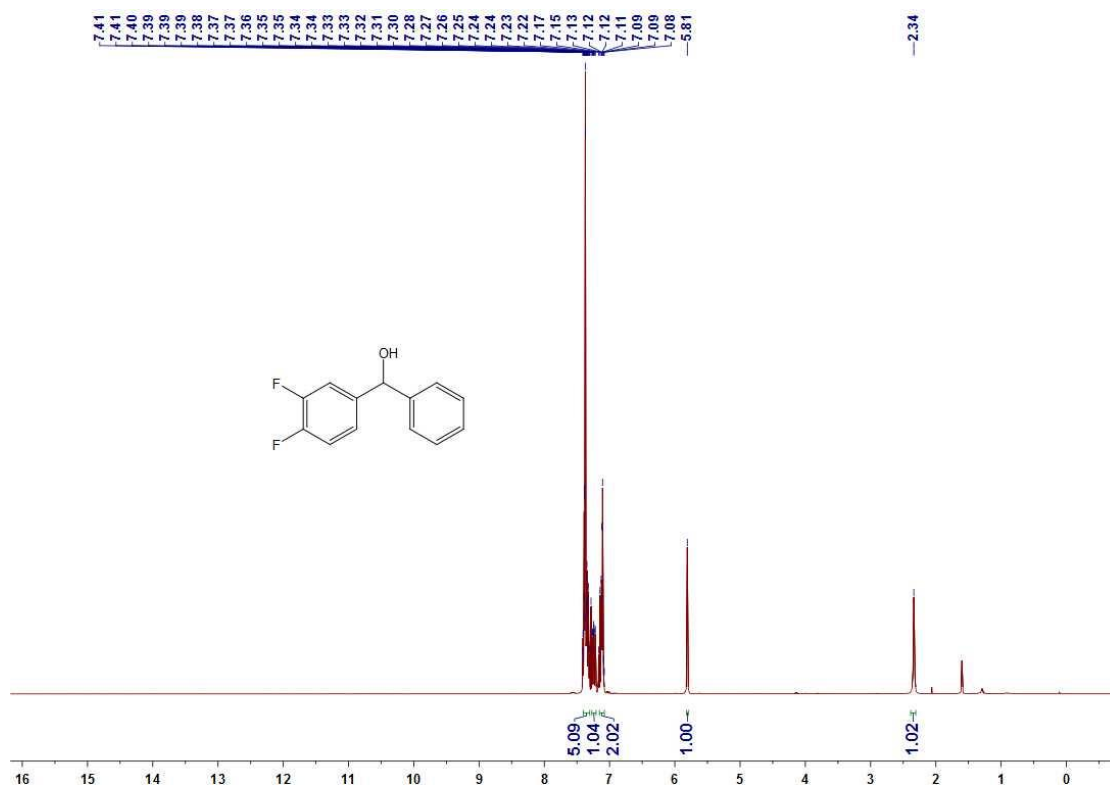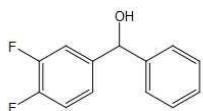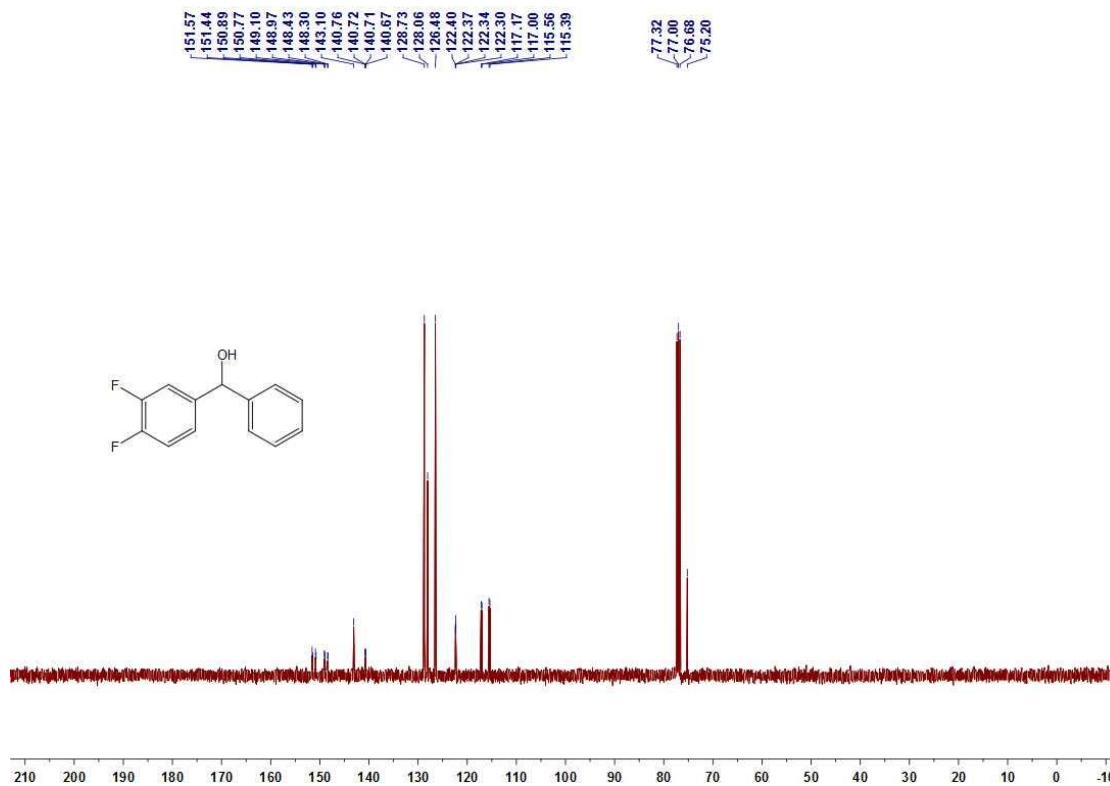

# <sup>1</sup>H and <sup>13</sup>C NMR spectra of (3,5-difluorophenyl)(phenyl)methanol

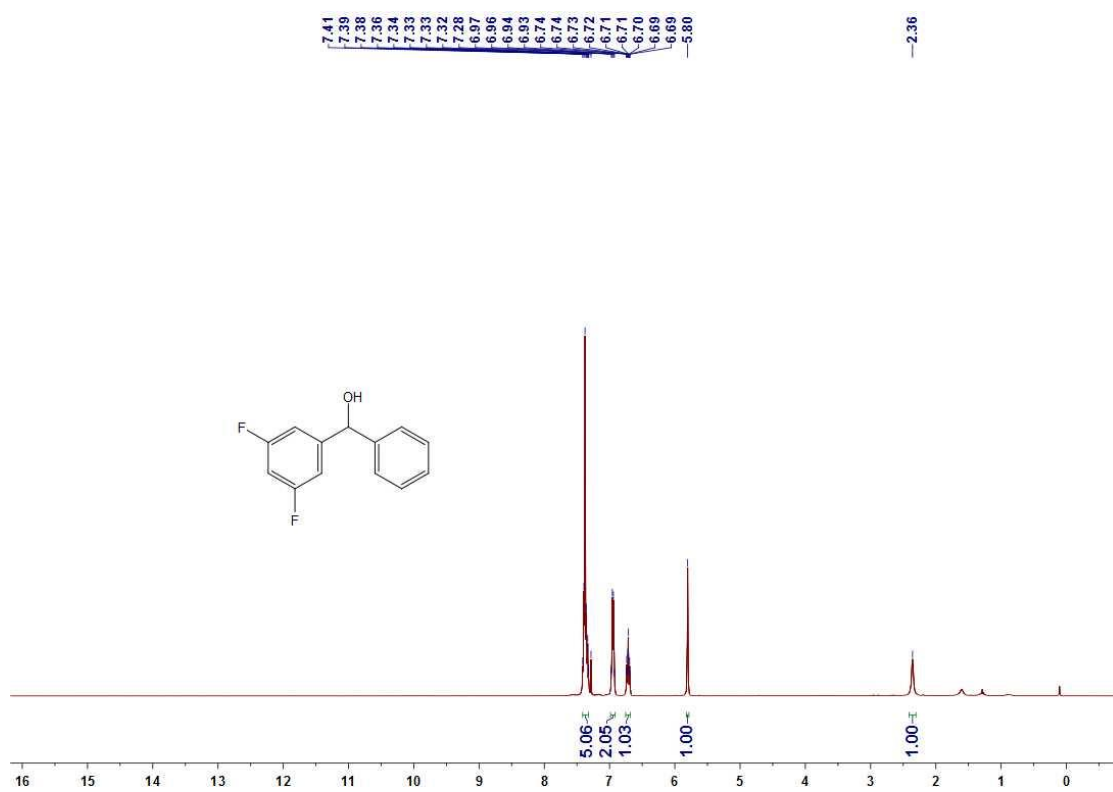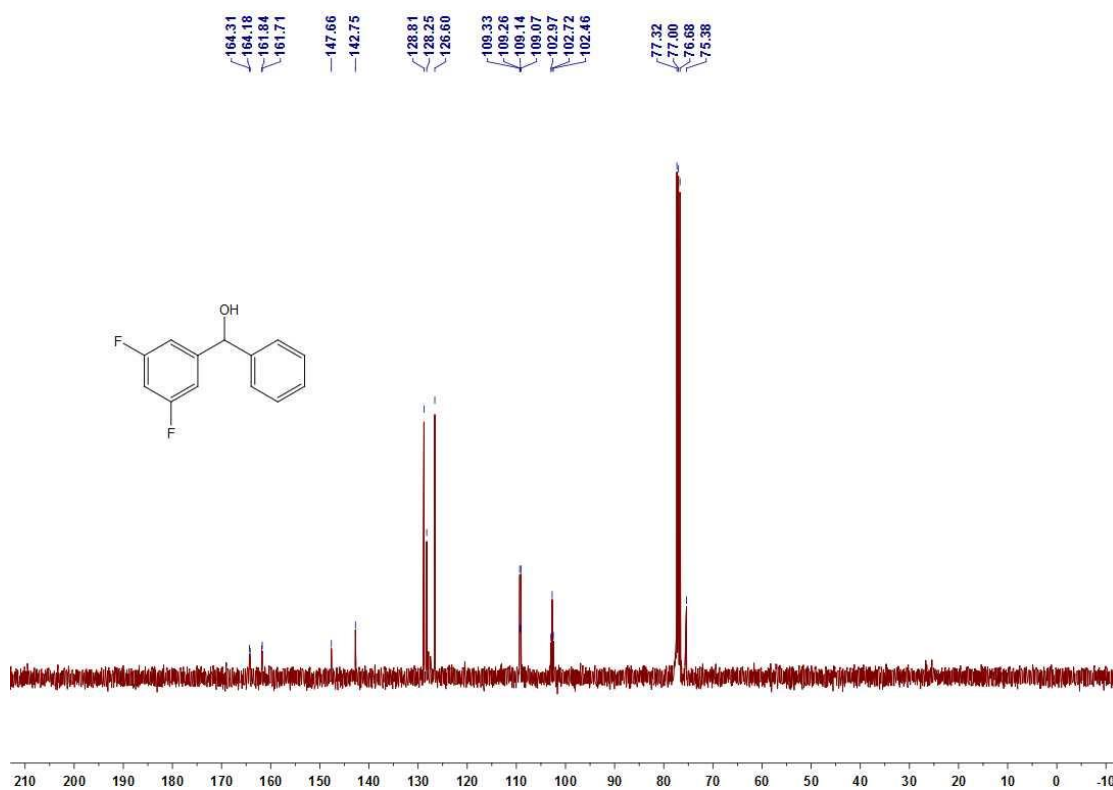

# <sup>1</sup>H and <sup>13</sup>C NMR spectra of di-p-tolylmethanol

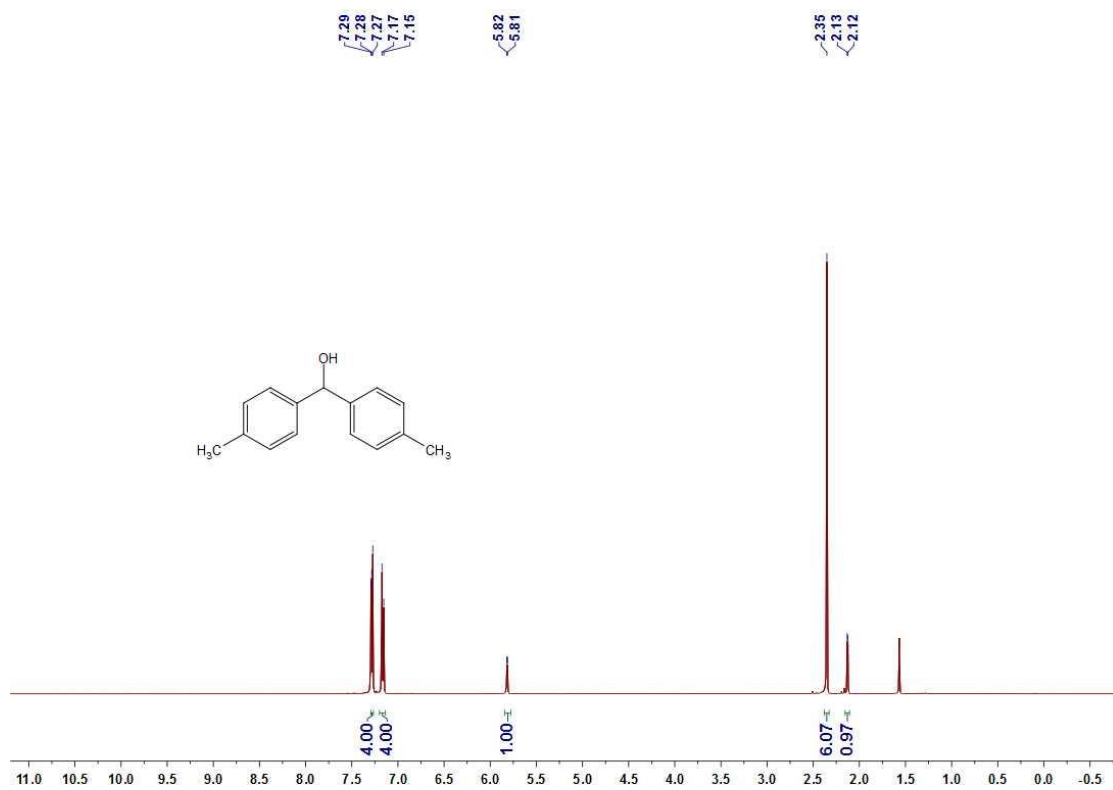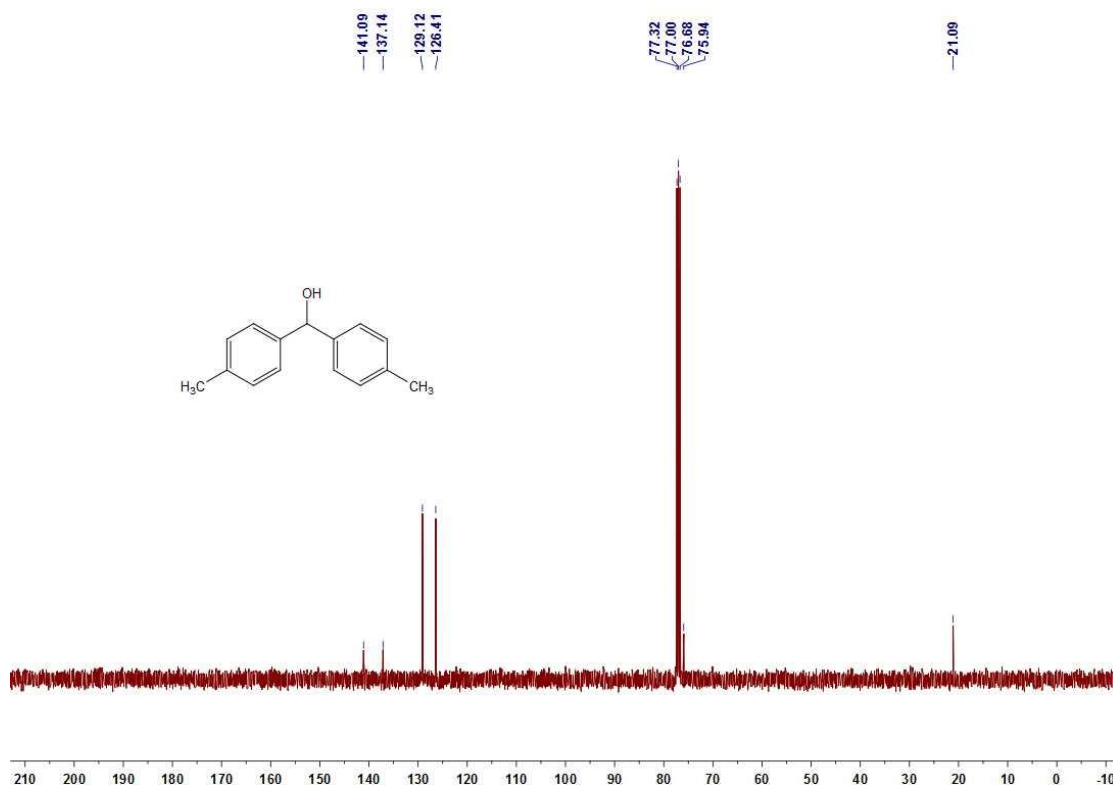

# $^1\text{H}$ and $^{13}\text{C}$ NMR spectra of bis(4-methoxyphenyl)methanol

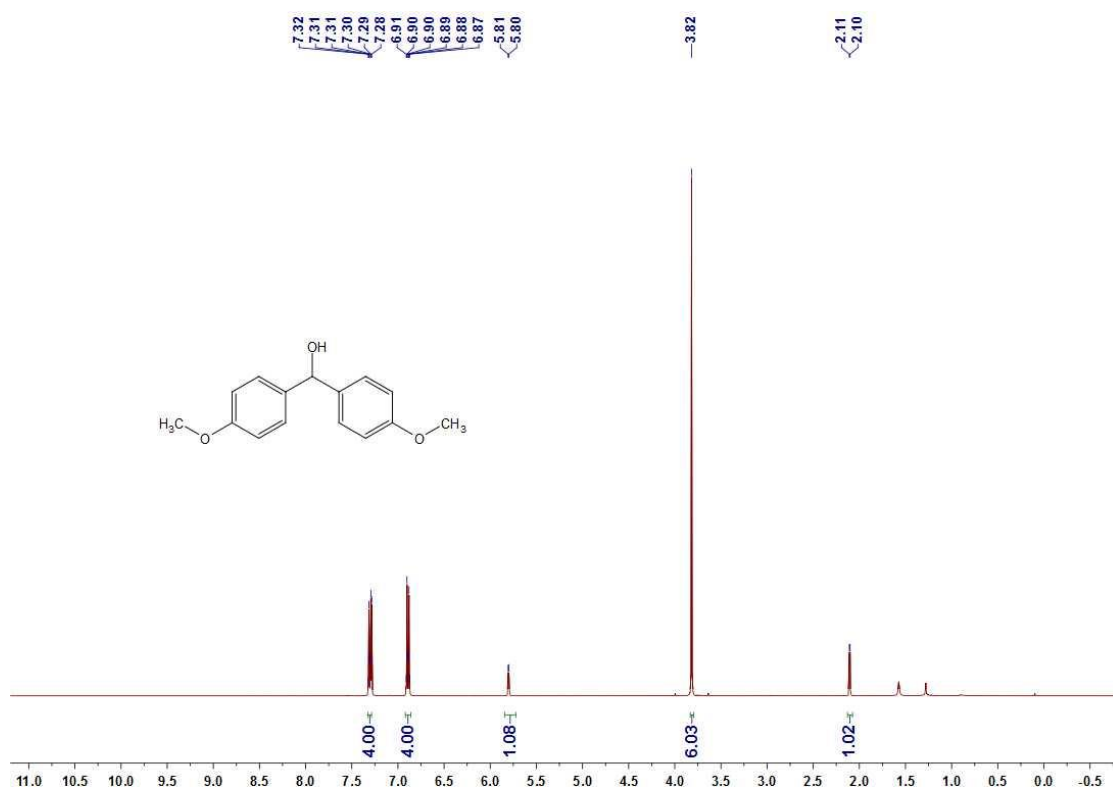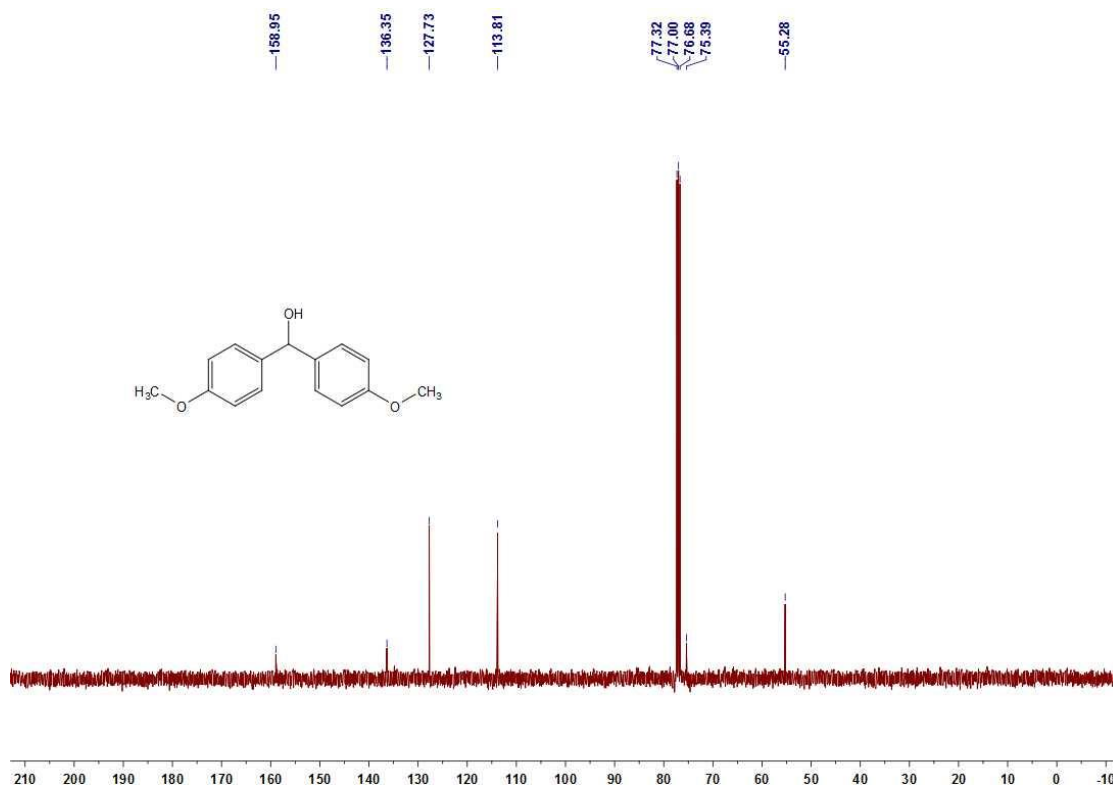



# <sup>1</sup>H and <sup>13</sup>C NMR spectra of bis(4-fluorophenyl)methanol

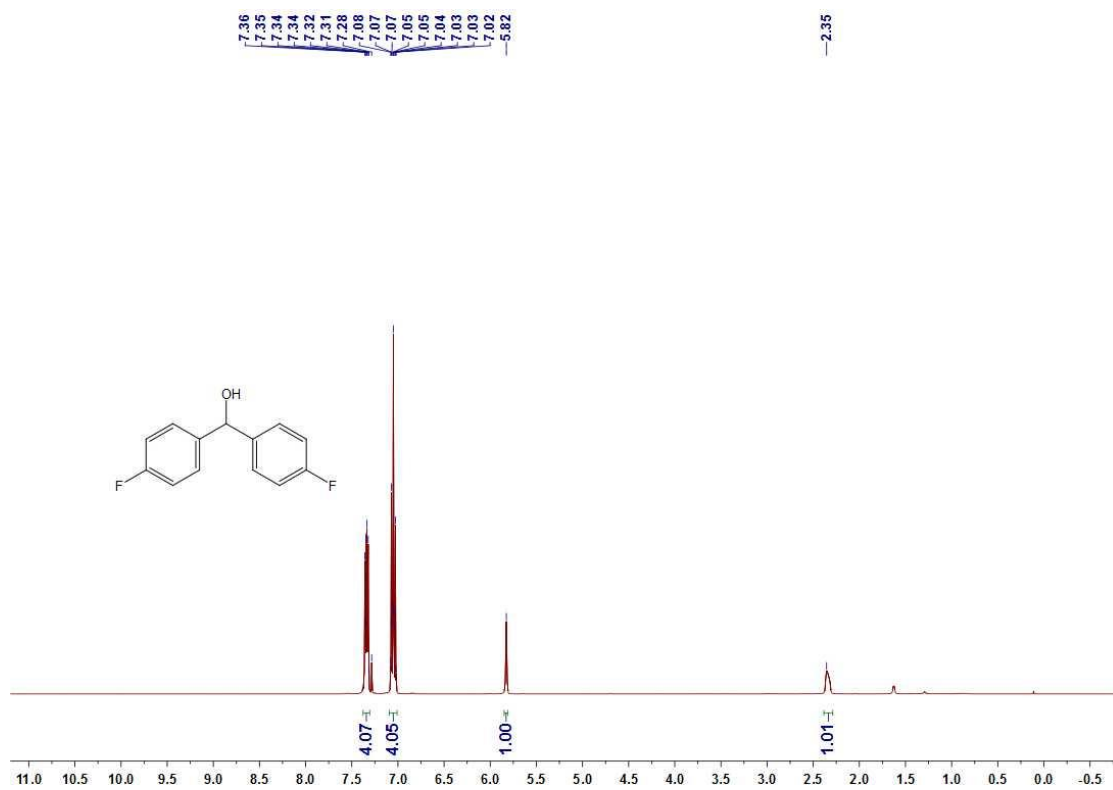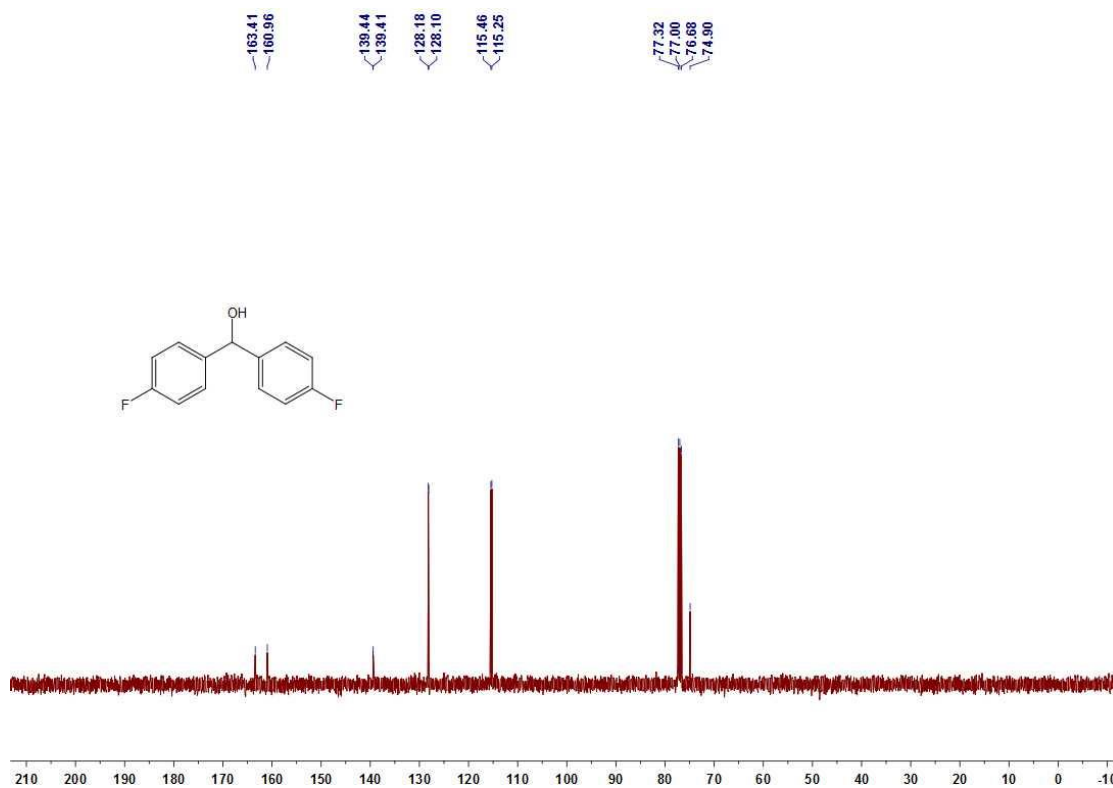

<sup>1</sup>H and <sup>13</sup>C NMR spectra of (4-methoxyphenyl)(p-tolyl)methanol

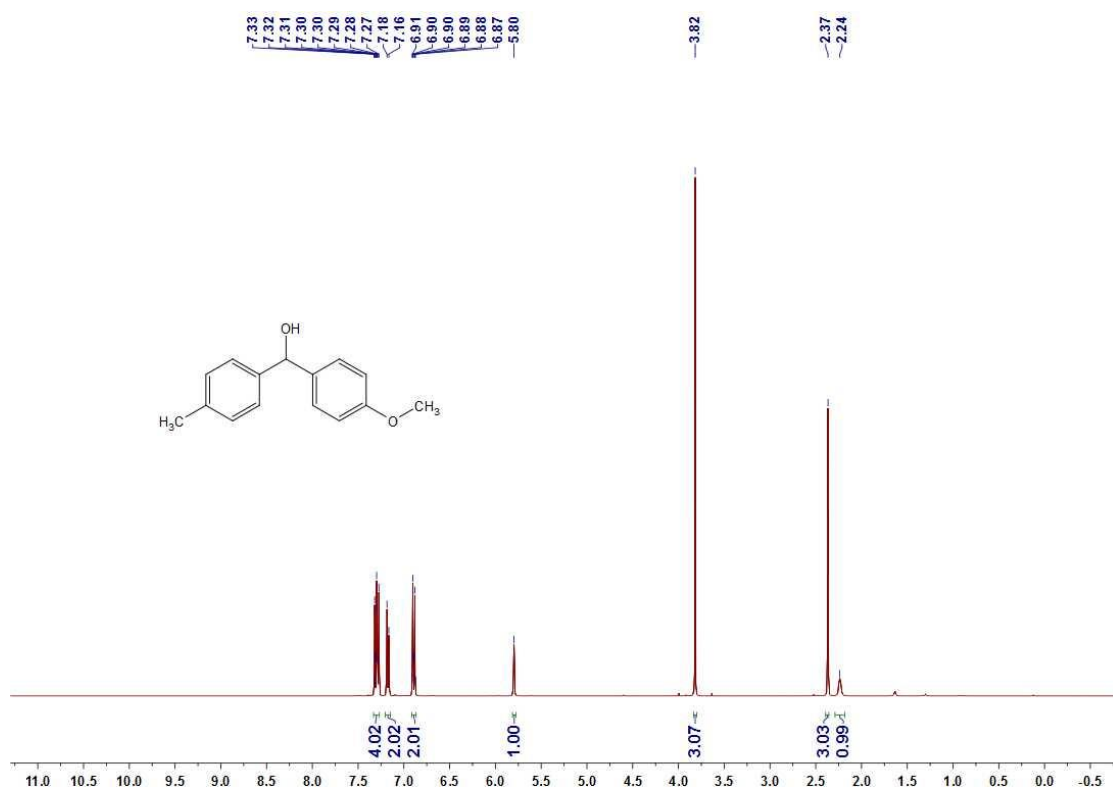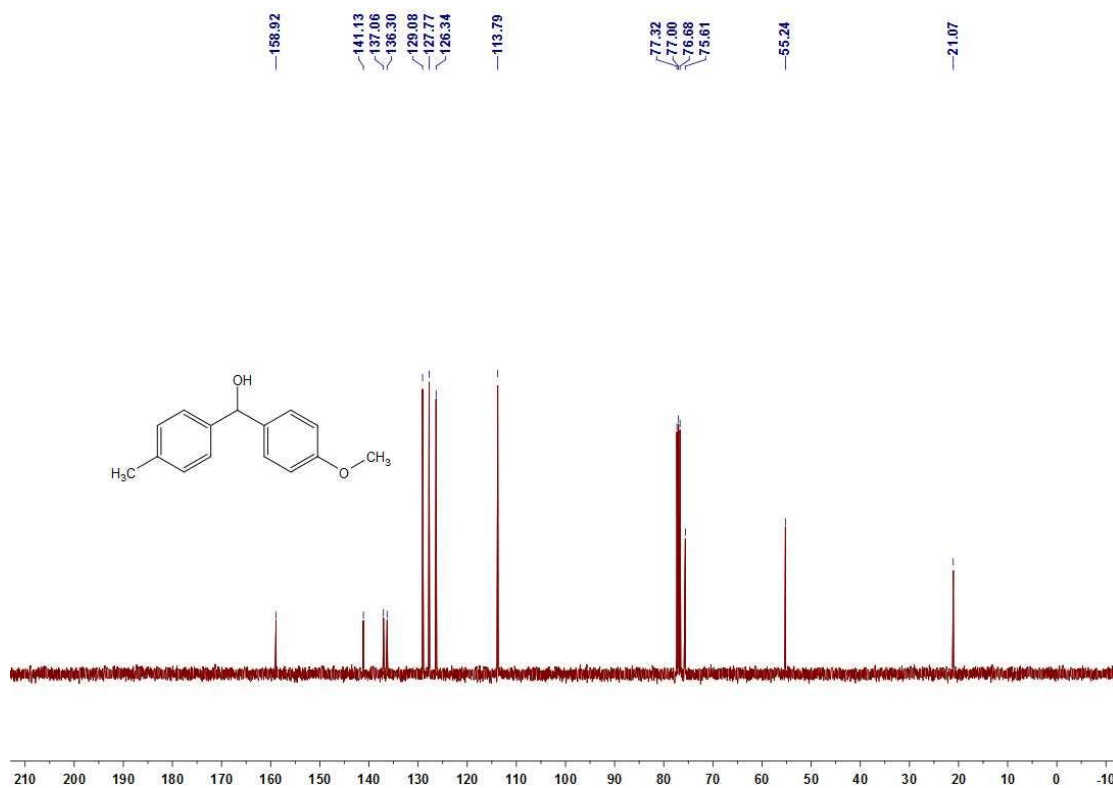

<sup>1</sup>H and <sup>13</sup>C NMR spectra of (4-methoxyphenyl)(4-(trifluoromethyl)phenyl)methanol

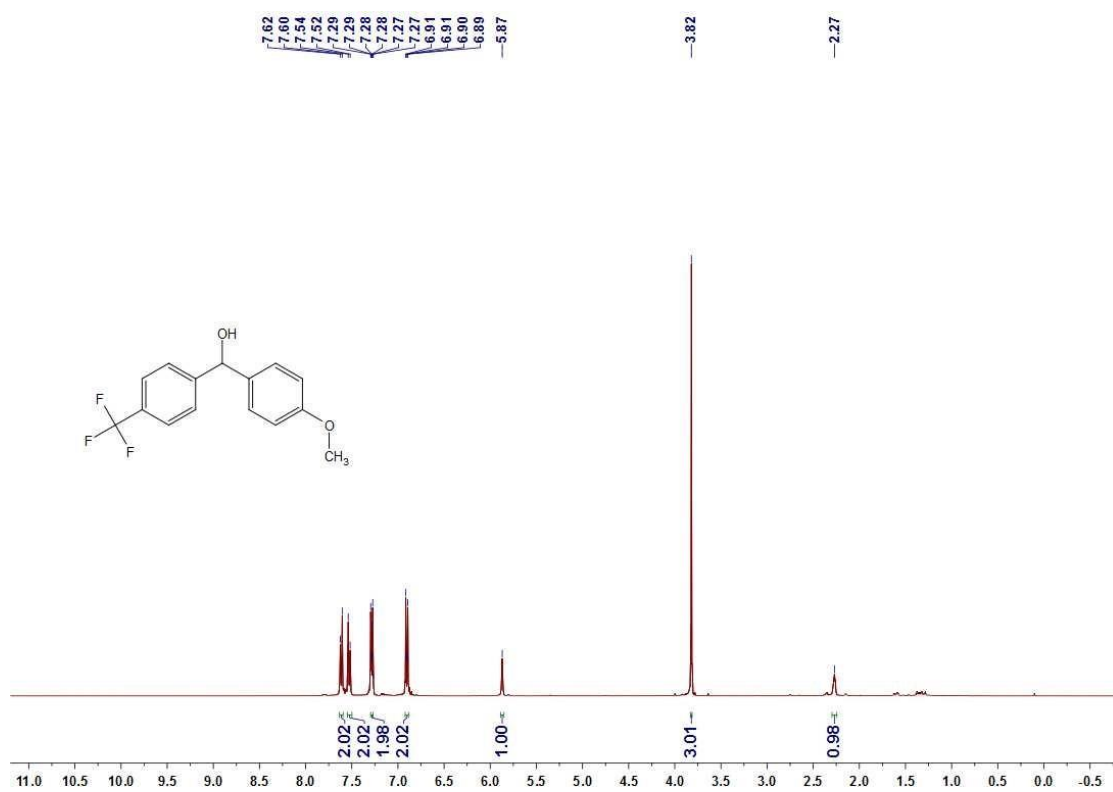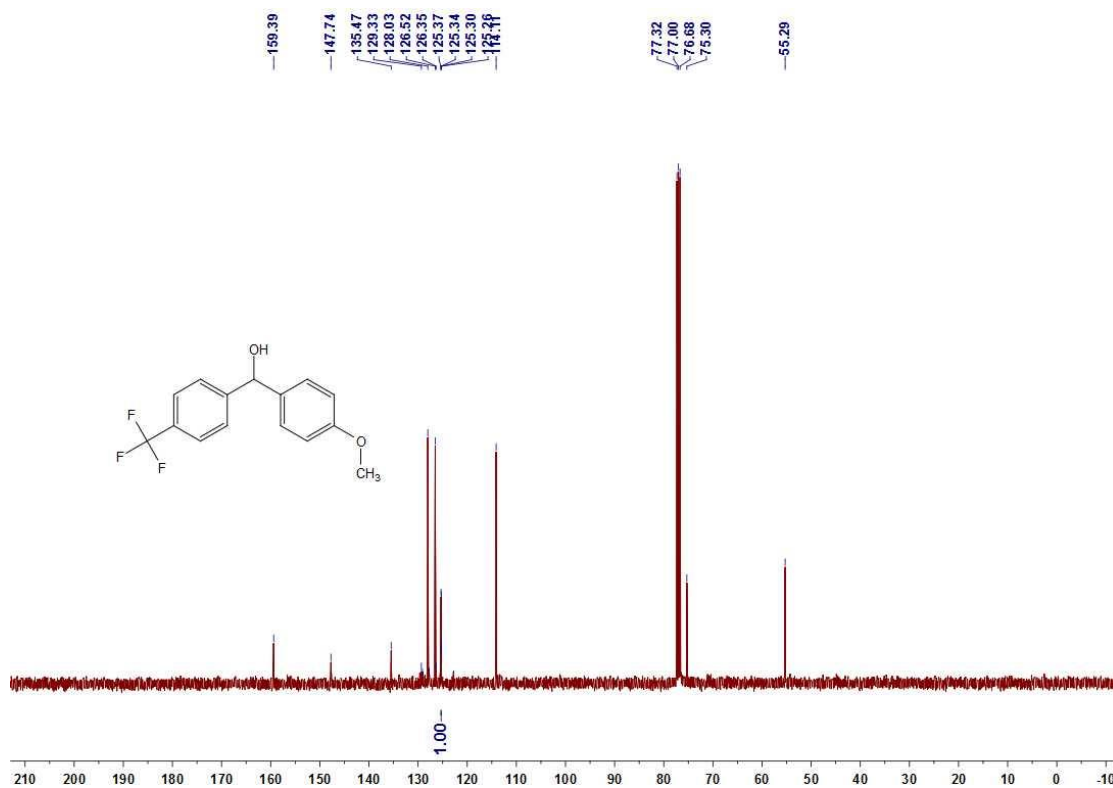

<sup>1</sup>H and <sup>13</sup>C NMR spectra of (3-methoxyphenyl)(4-methoxyphenyl)methanol

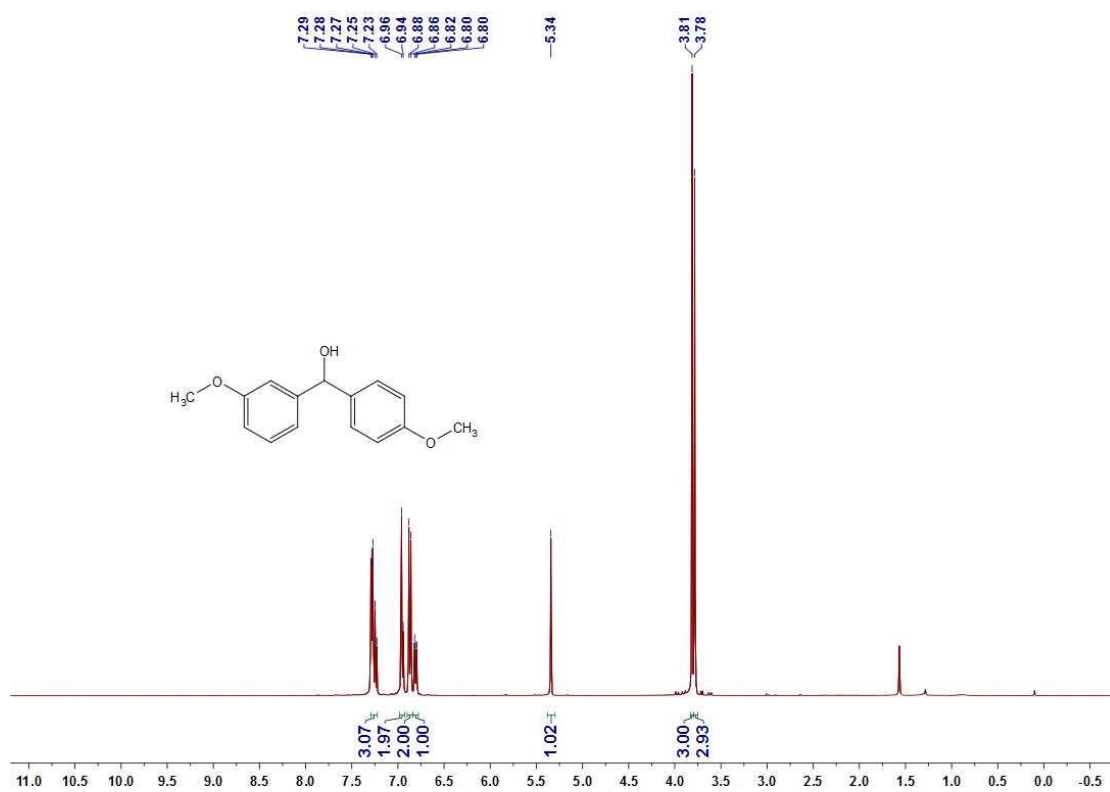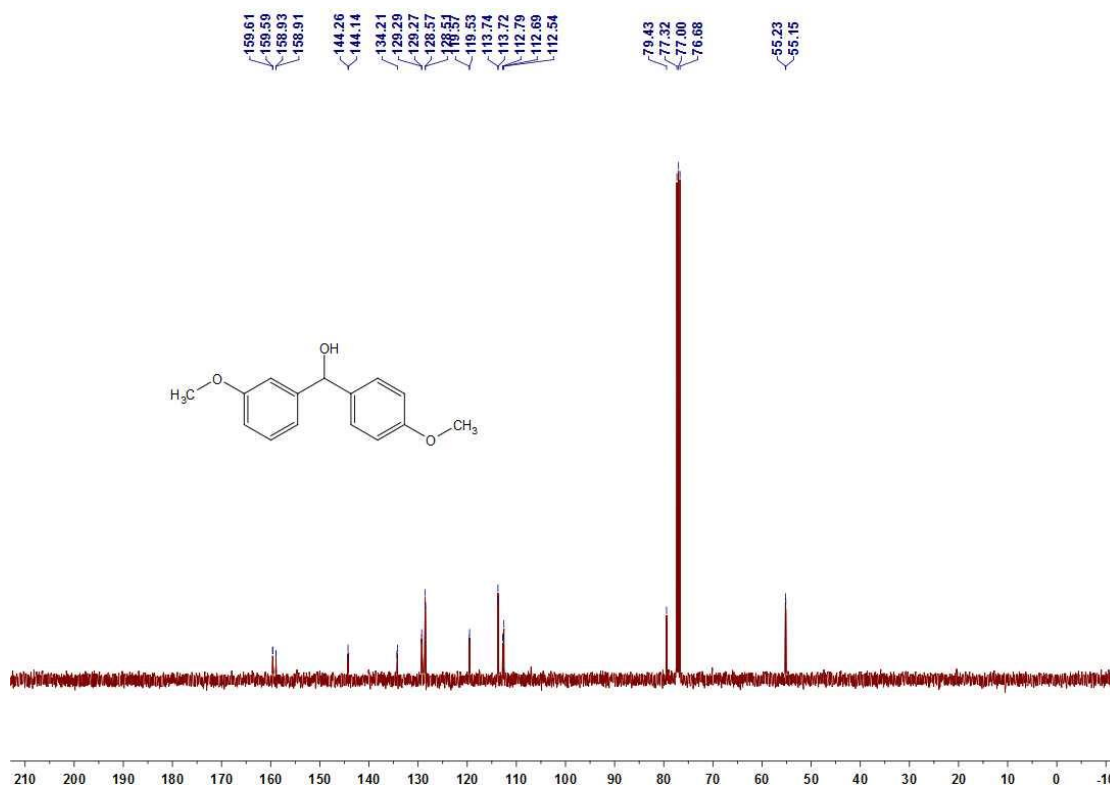

# $^1\text{H}$ and $^{13}\text{C}$ NMR spectra of (3,5-difluorophenyl)(4-methoxyphenyl)methanol

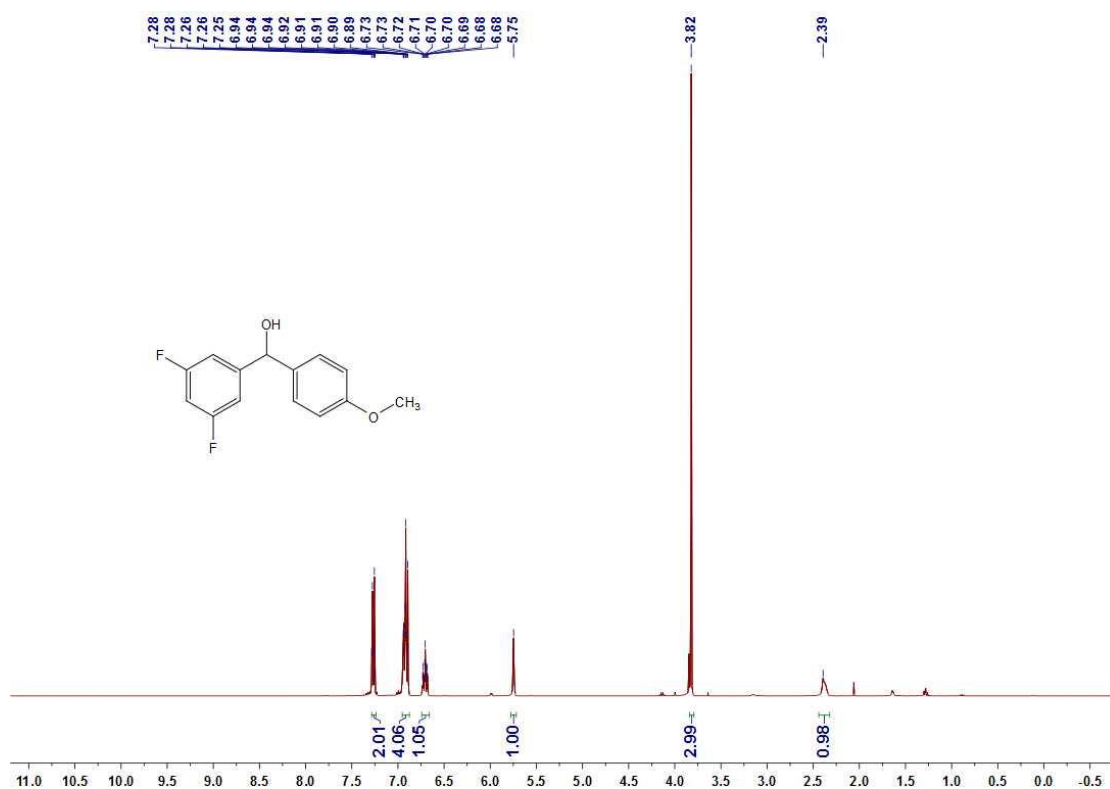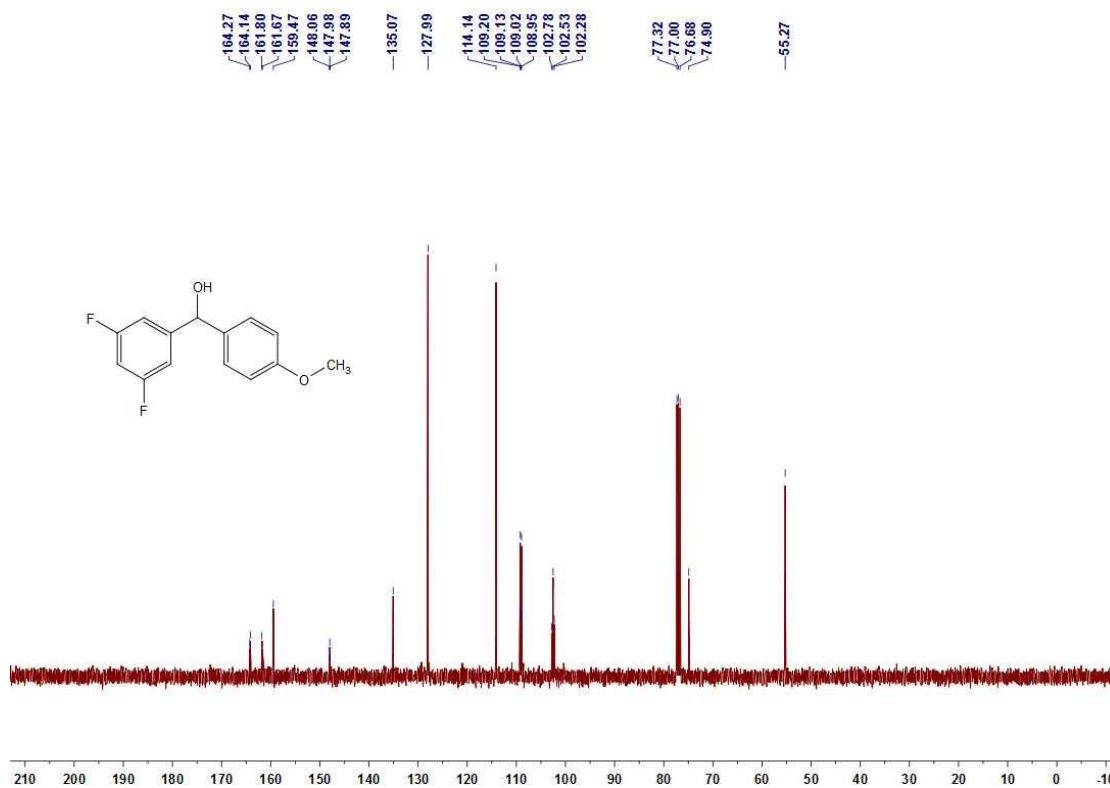

<sup>1</sup>H and <sup>13</sup>C NMR spectra of 1,3-phenylenebis(phenylmethanol)

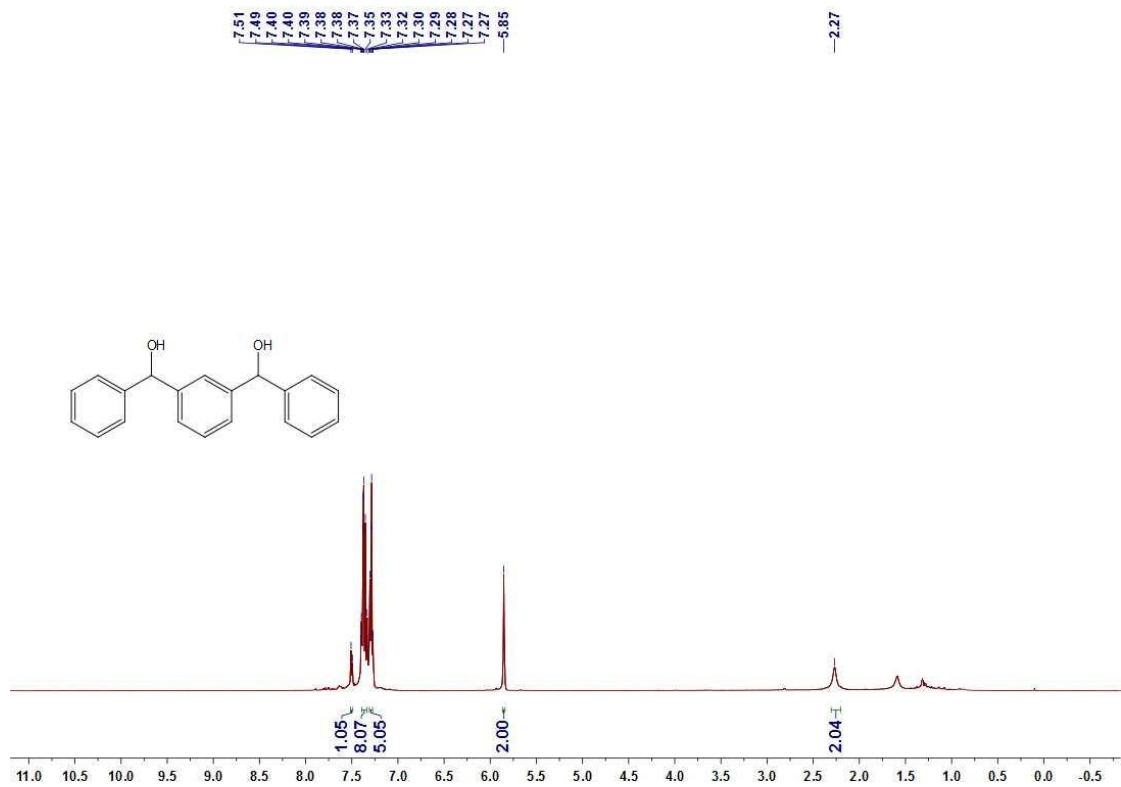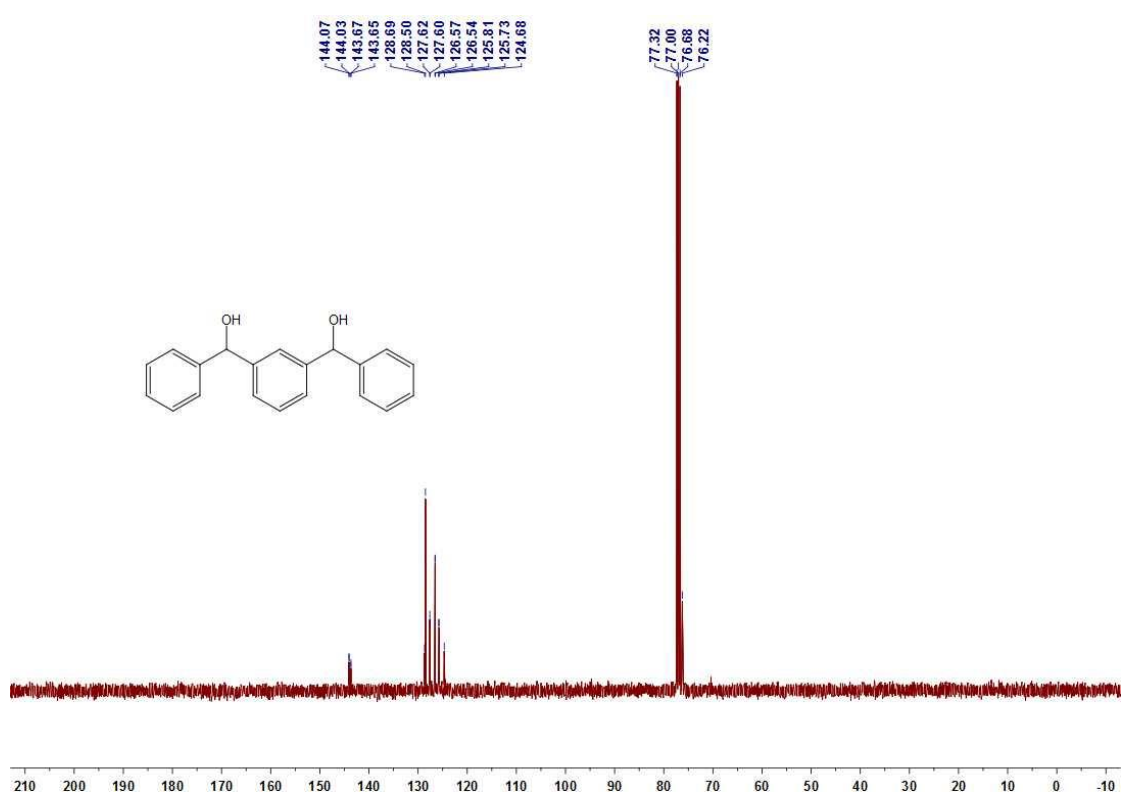

<sup>1</sup>H and <sup>13</sup>C NMR spectra of 1-(4-(hydroxy(phenyl)methyl)phenyl)ethanone

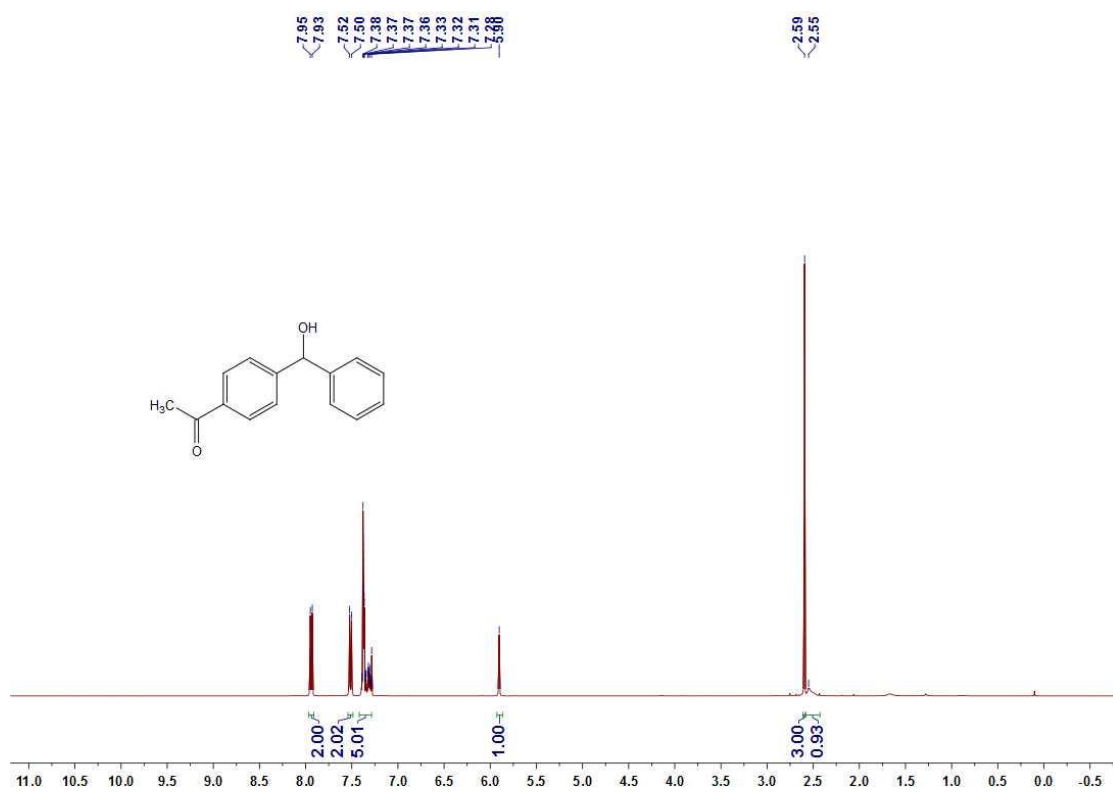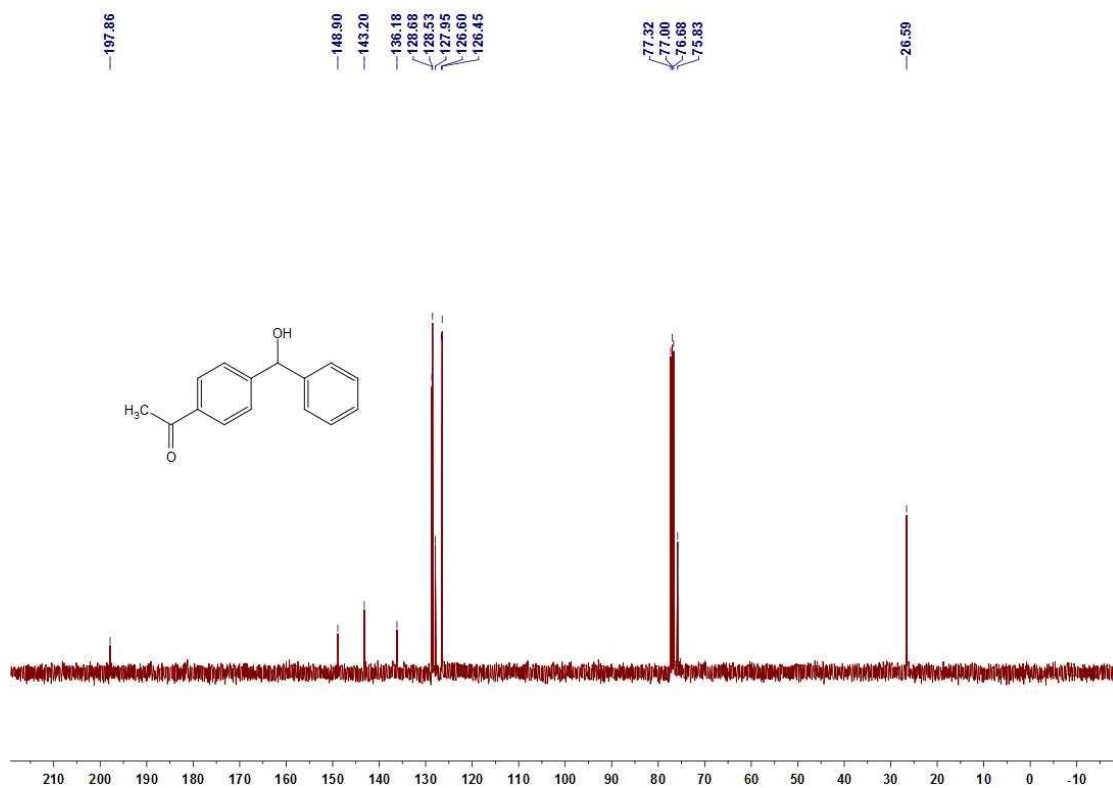

# $^1\text{H}$ and $^{13}\text{C}$ NMR spectra of 9H-fluoren-9-ol

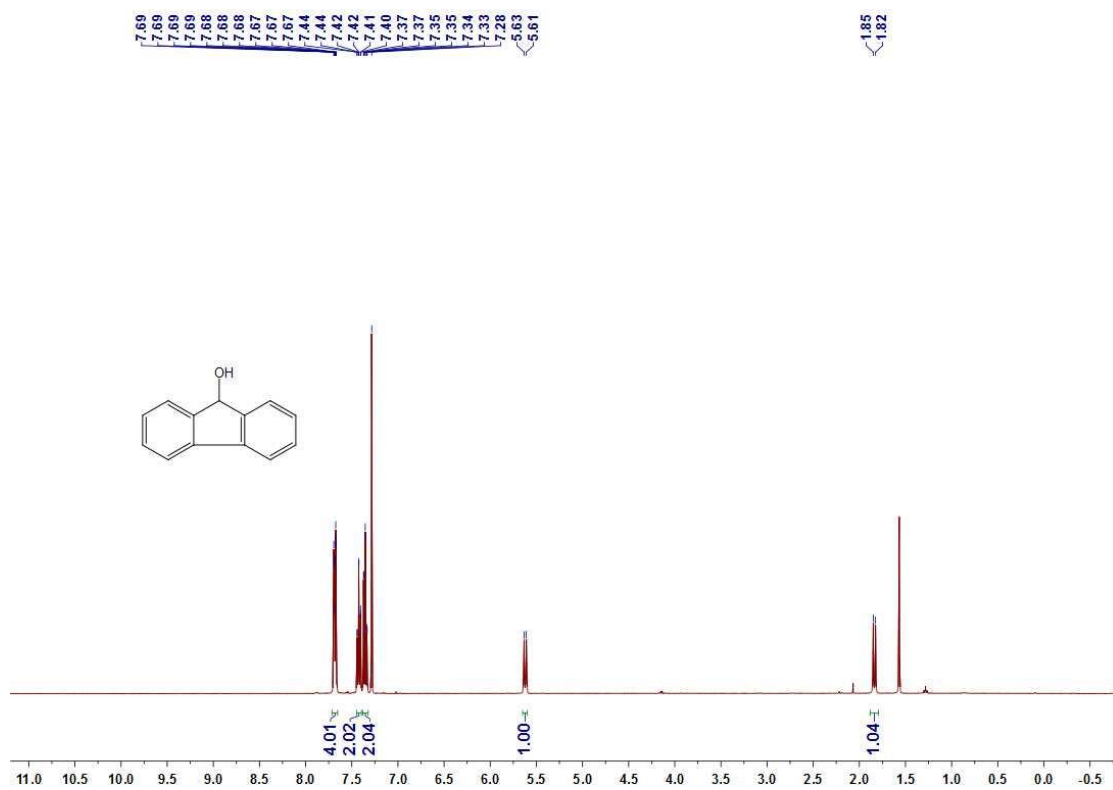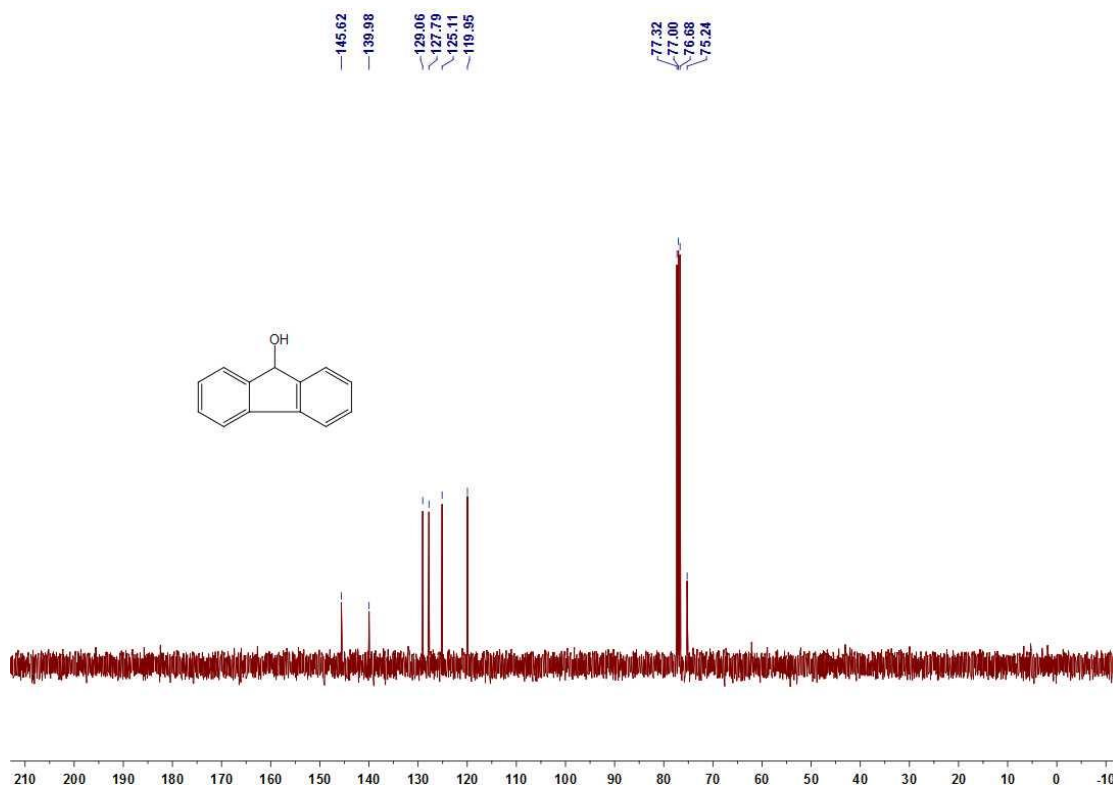



# <sup>1</sup>H and <sup>13</sup>C NMR spectra of di(pyridin-2-yl)methanol

8.55  
8.55  
8.54  
8.54  
7.64  
7.62  
7.62  
7.54  
7.52  
7.19  
7.18  
7.18  
7.17  
7.17  
5.90  
5.87

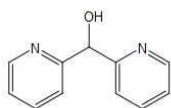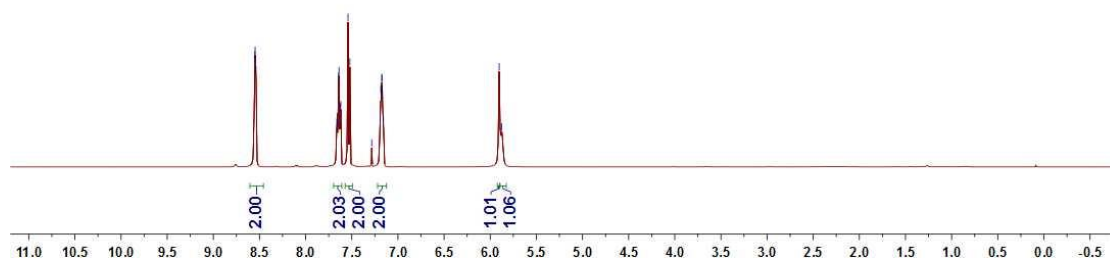

160.74  
148.19  
136.87  
122.59  
121.15  
77.32  
77.00  
76.68  
75.18

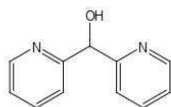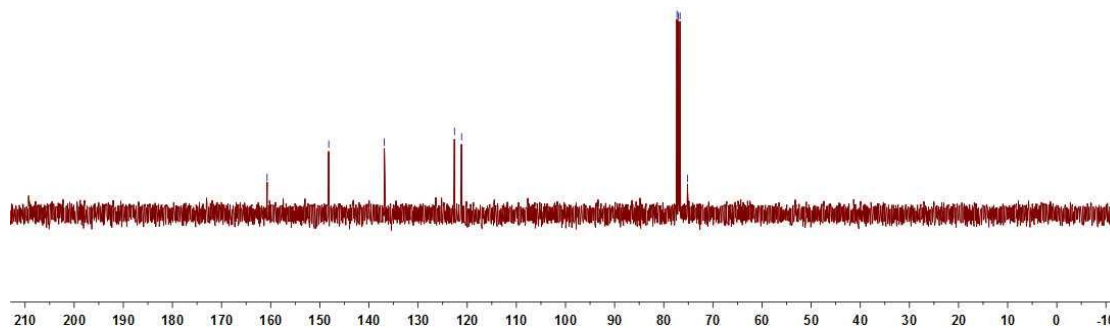

# <sup>1</sup>H and <sup>13</sup>C NMR spectra of phenyl(pyridin-2-yl)methanol

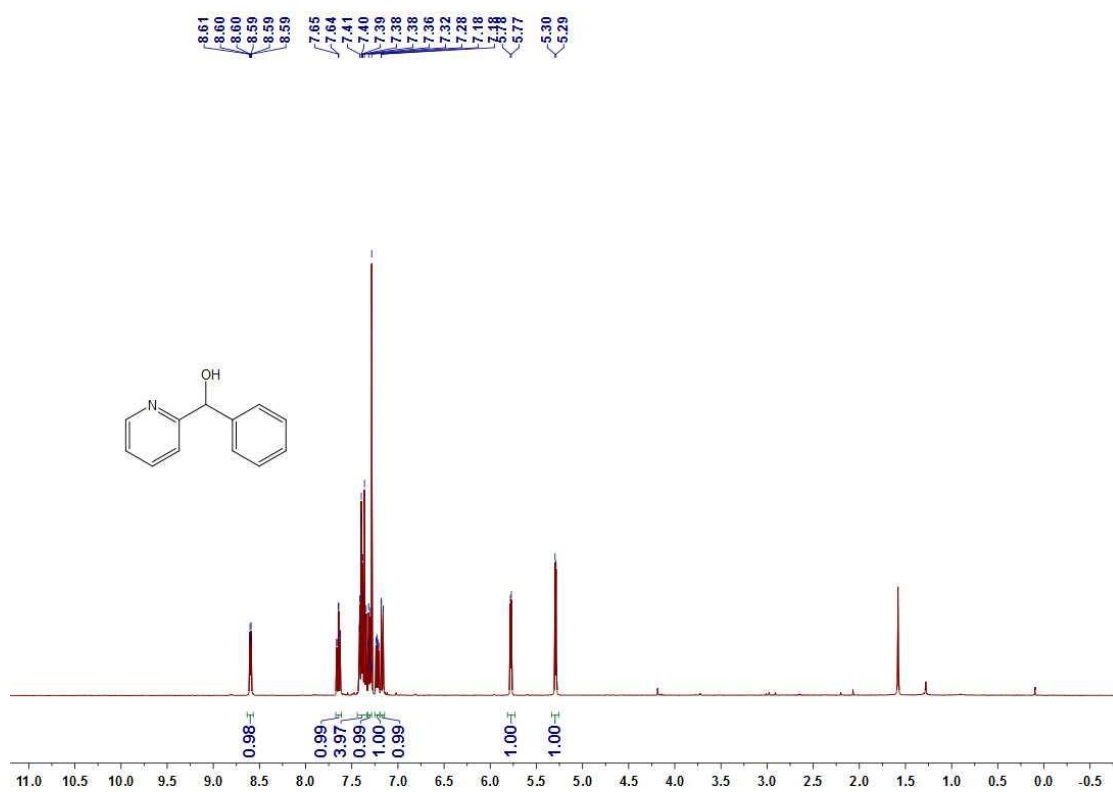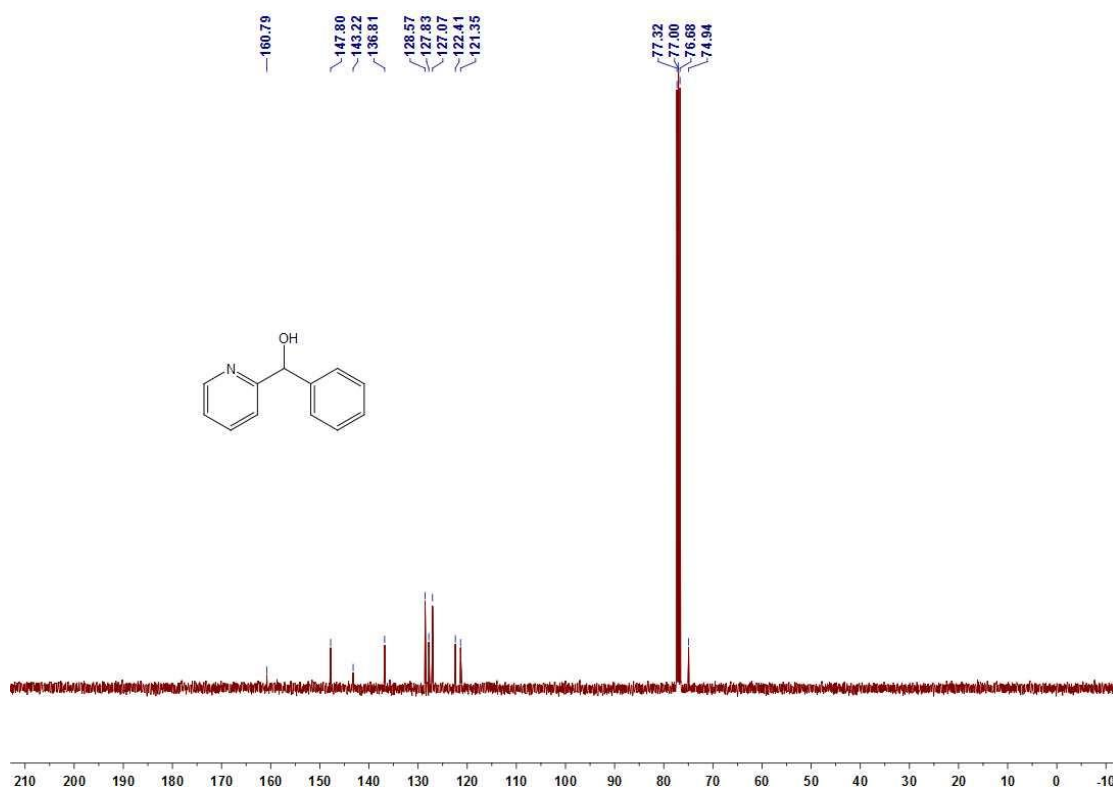

# $^1\text{H}$ and $^{13}\text{C}$ NMR spectra of phenyl(thiophen-2-yl)methanol

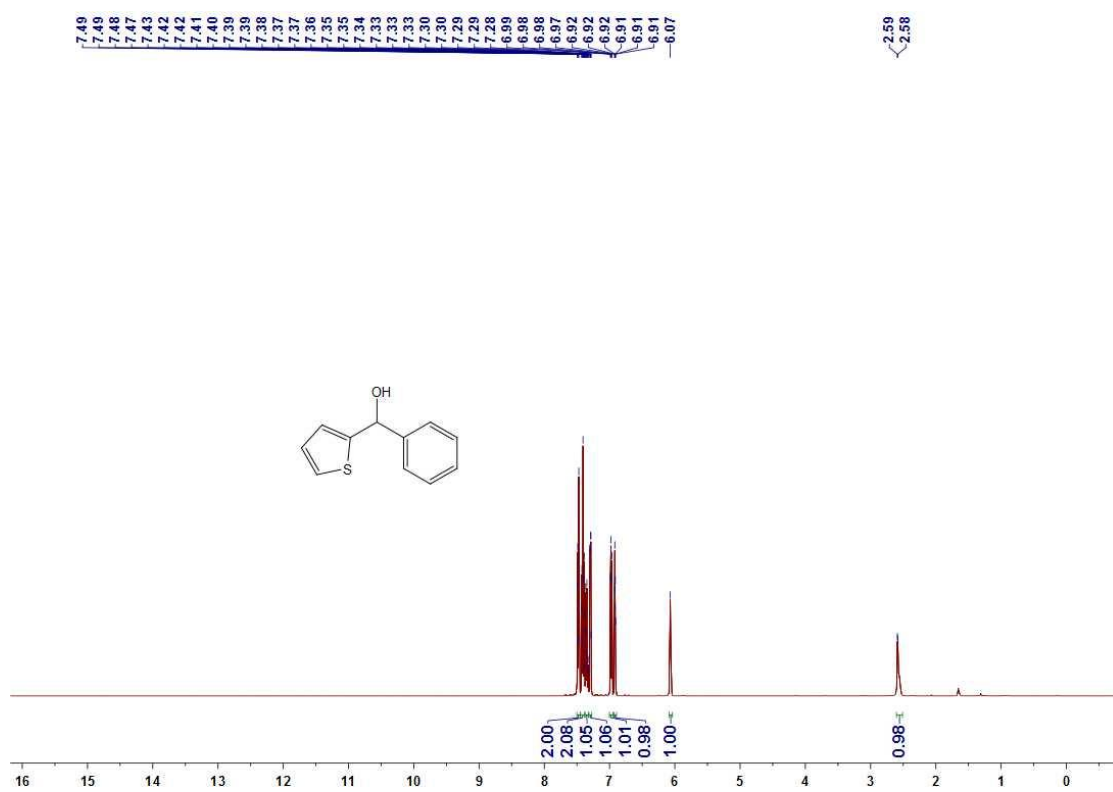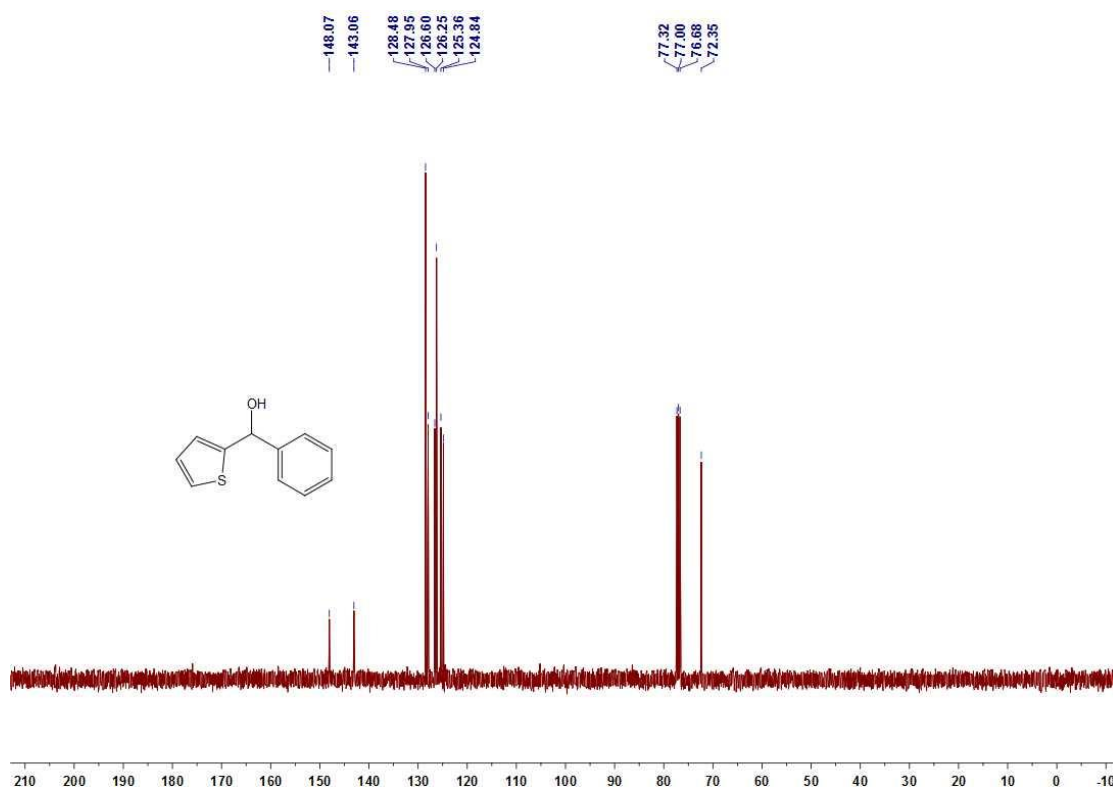

<sup>1</sup>H and <sup>13</sup>C NMR spectra of (2,3-dihydrobenzofuran-5-yl)(phenyl)methanol

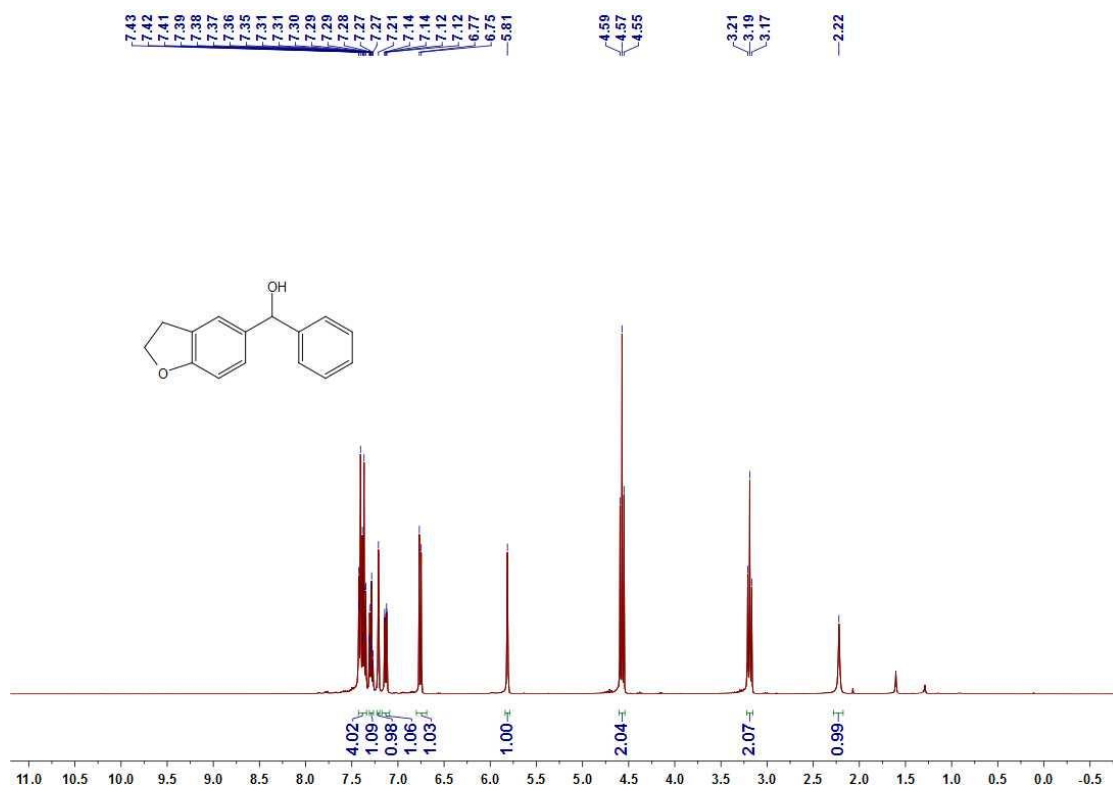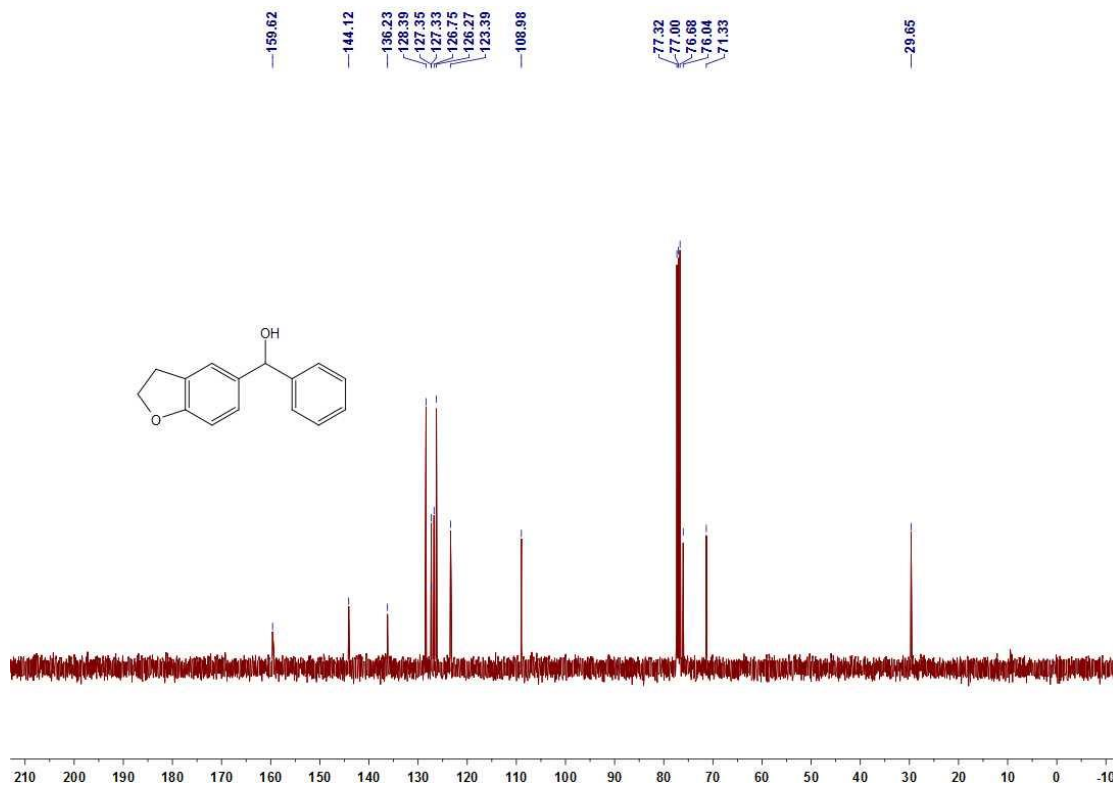

$^1\text{H}$  and  $^{13}\text{C}$  NMR spectra of **benzofuran-2-yl(phenyl)methanol**

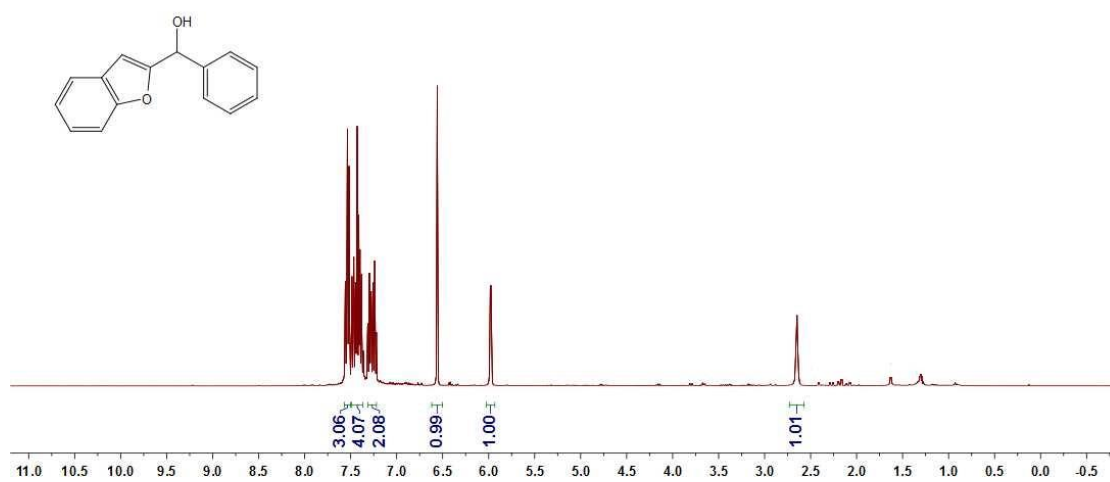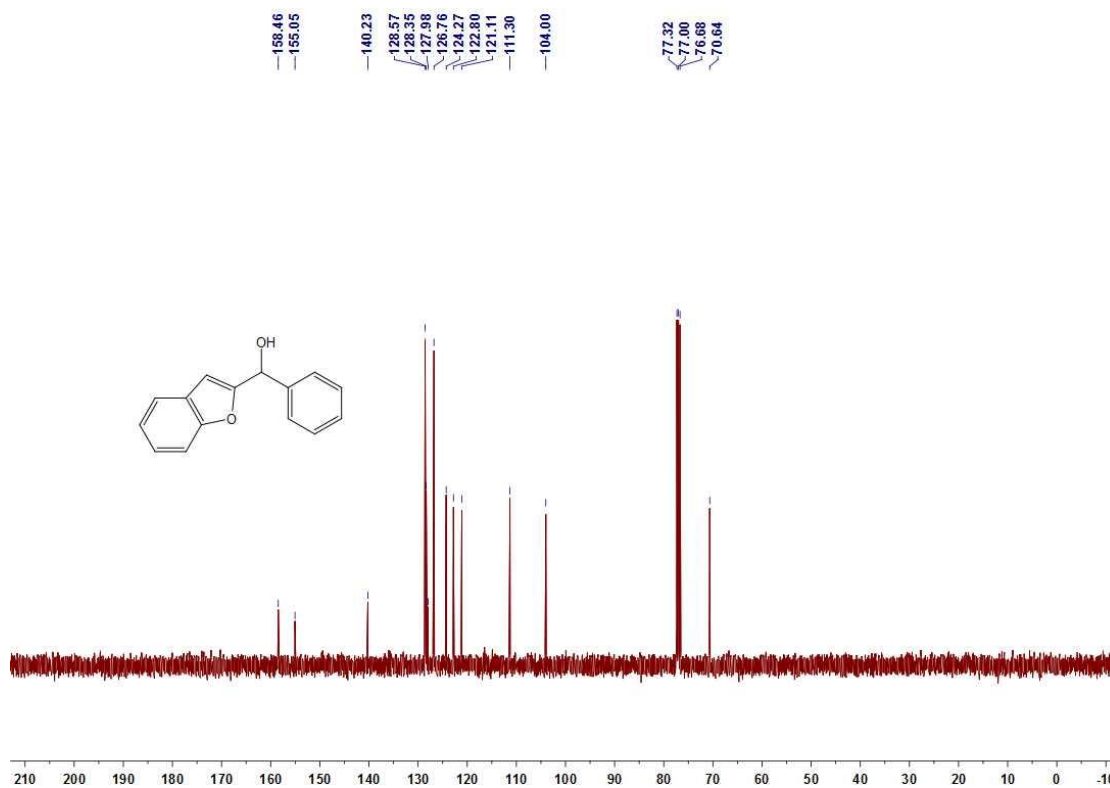

# $^1\text{H}$ and $^{13}\text{C}$ NMR spectra of 1-phenylethanol

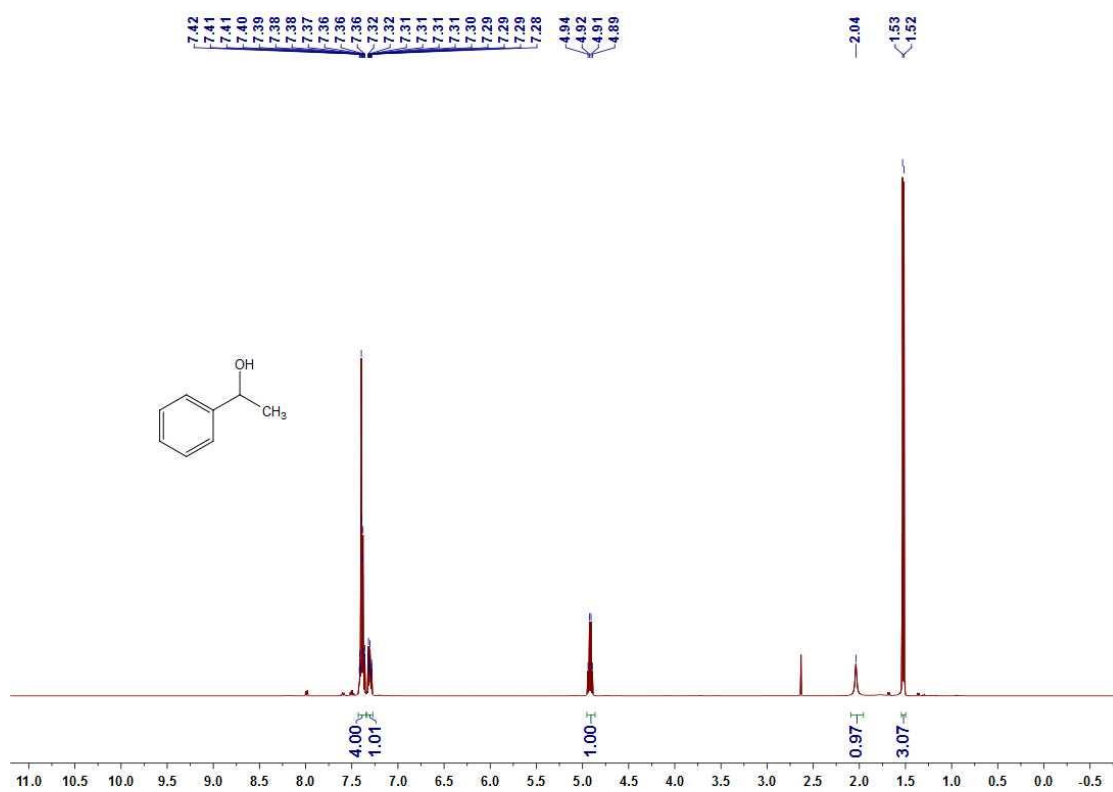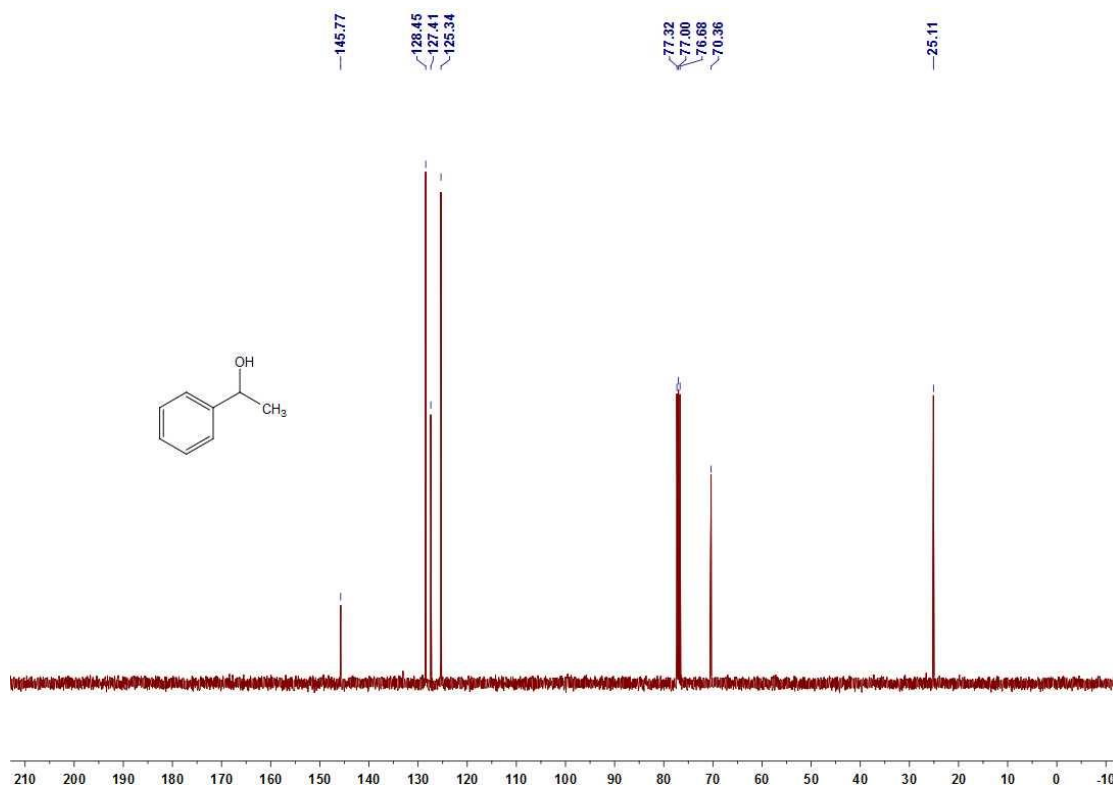

<sup>1</sup>H and <sup>13</sup>C NMR spectra of 1-phenylhexan-1-ol

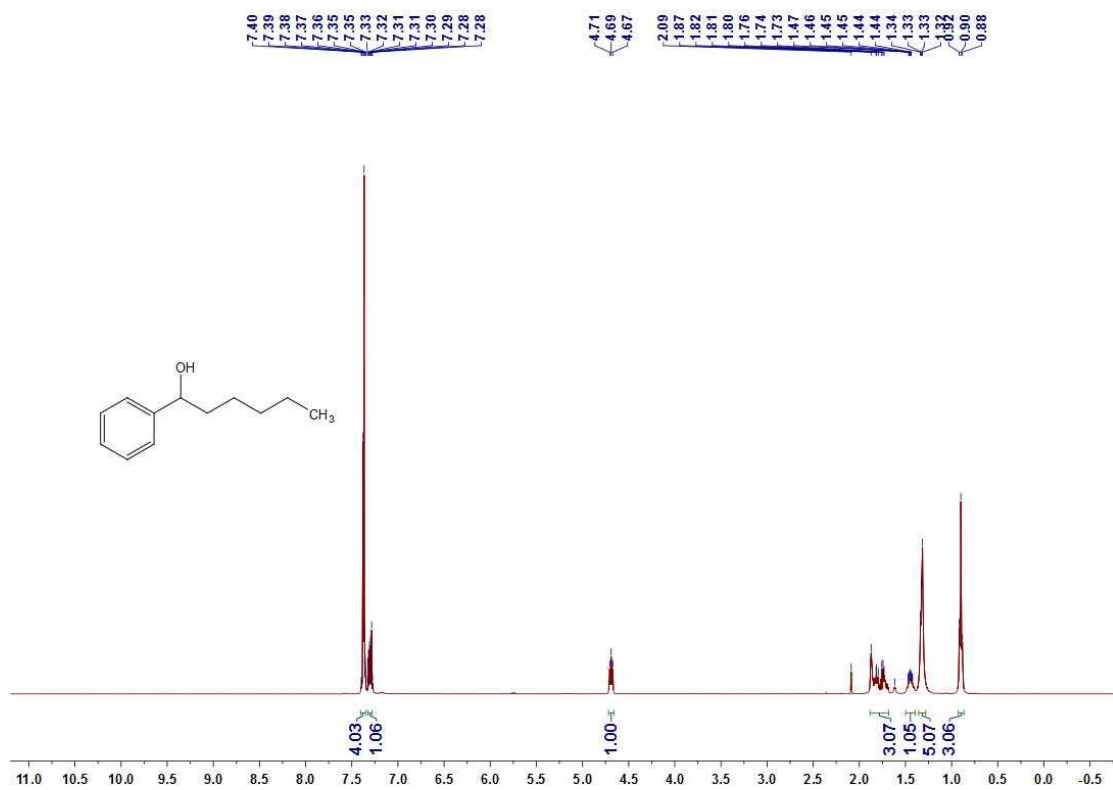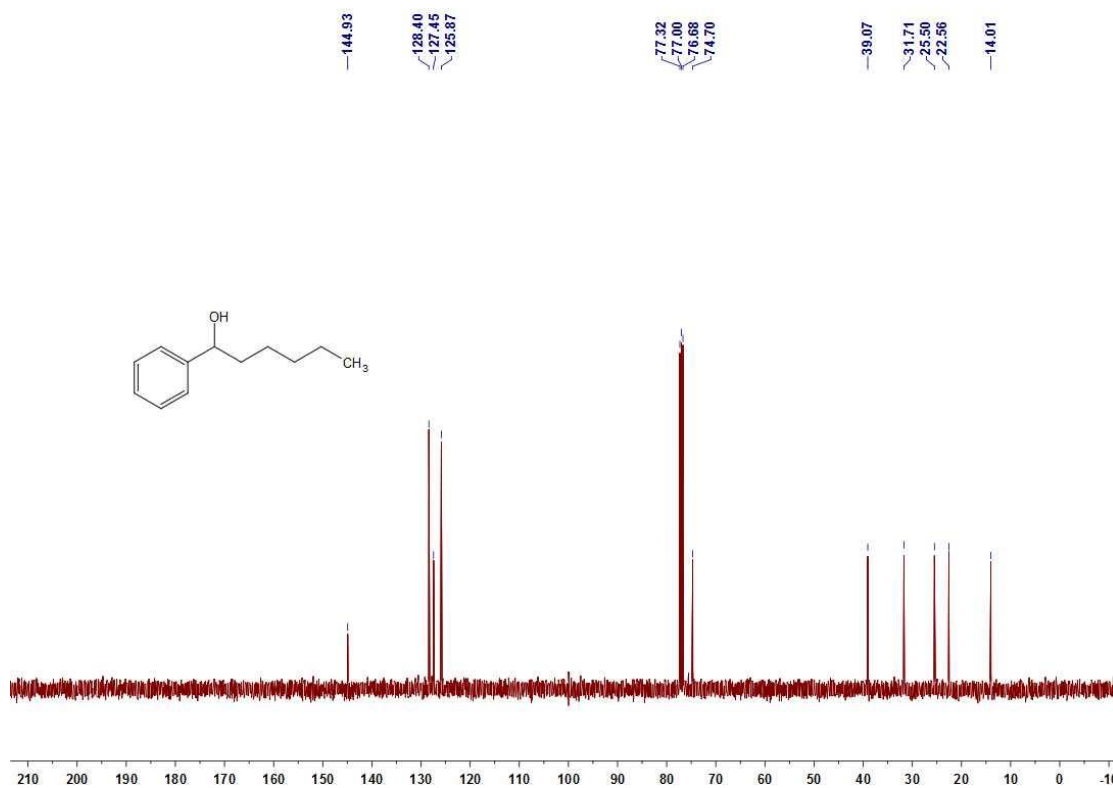

# <sup>1</sup>H and <sup>13</sup>C NMR spectra of 1-(4-methoxyphenyl)ethanol

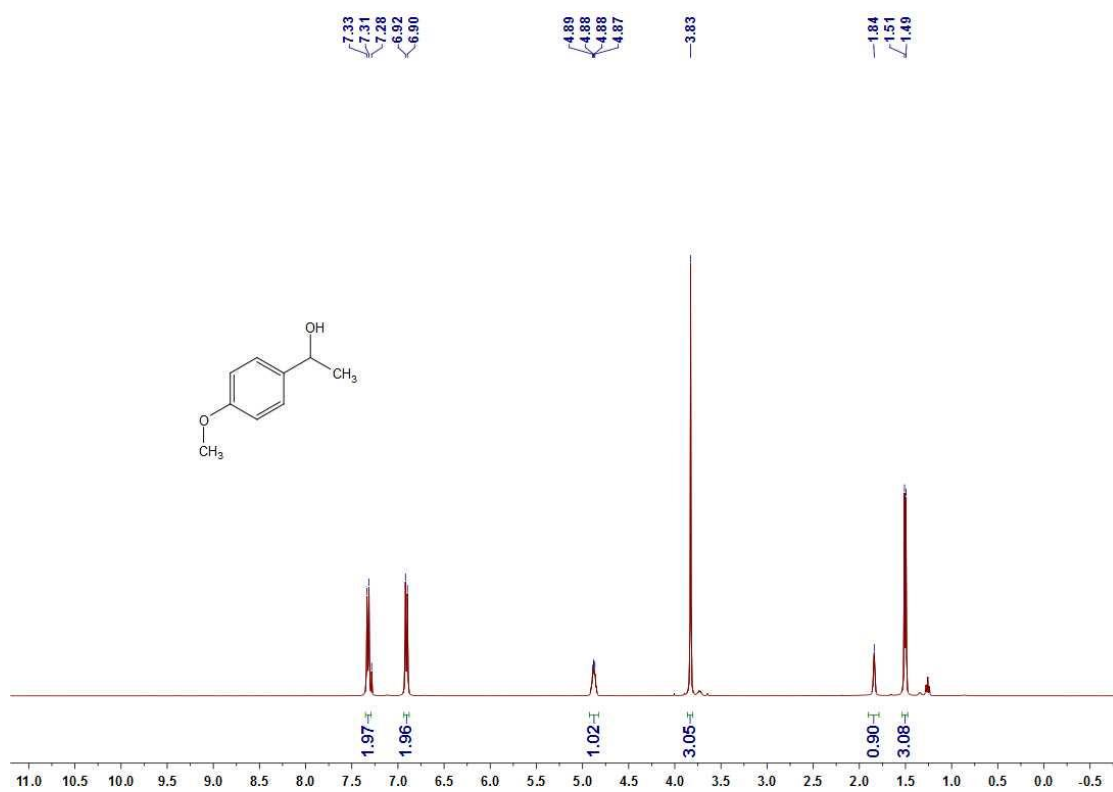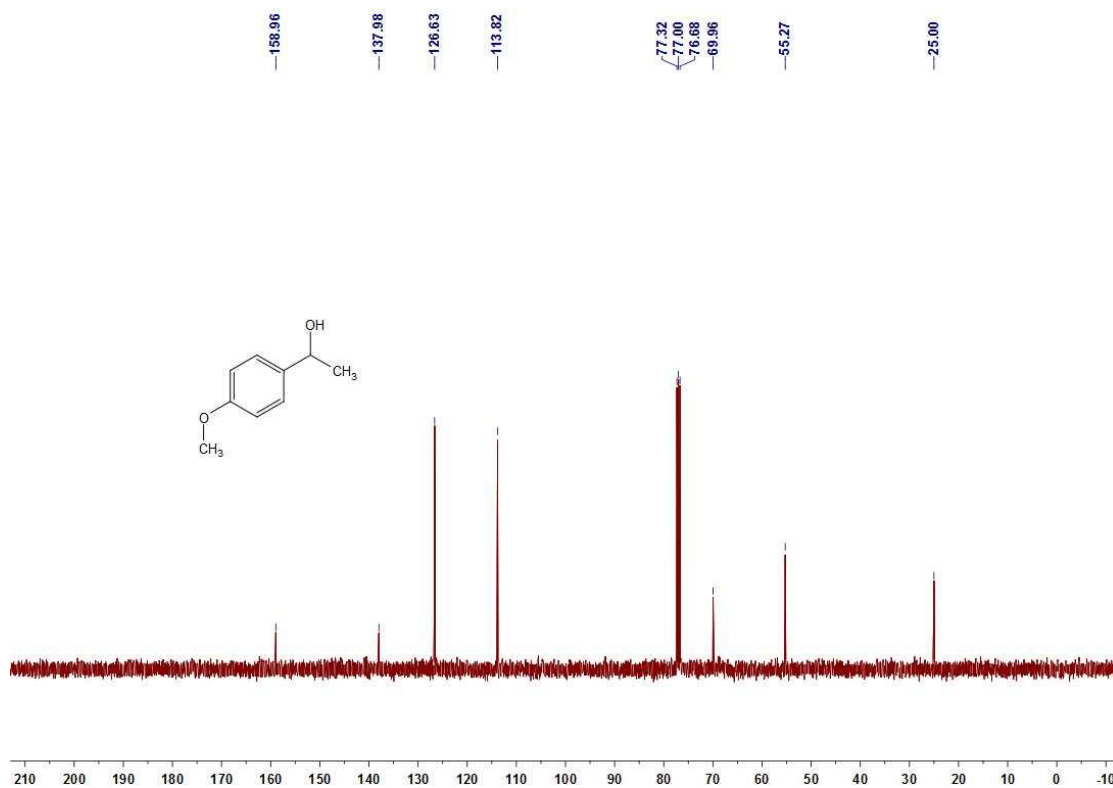





# $^1\text{H}$ and $^{13}\text{C}$ NMR spectra of phenylmethanol

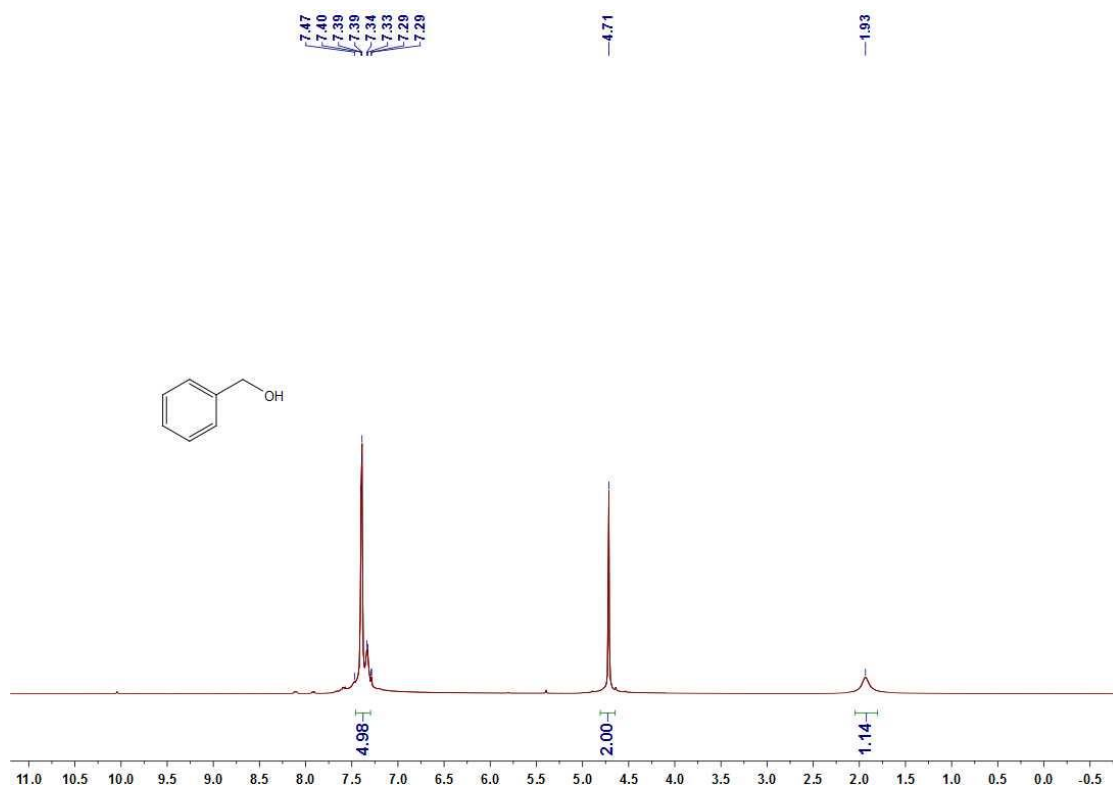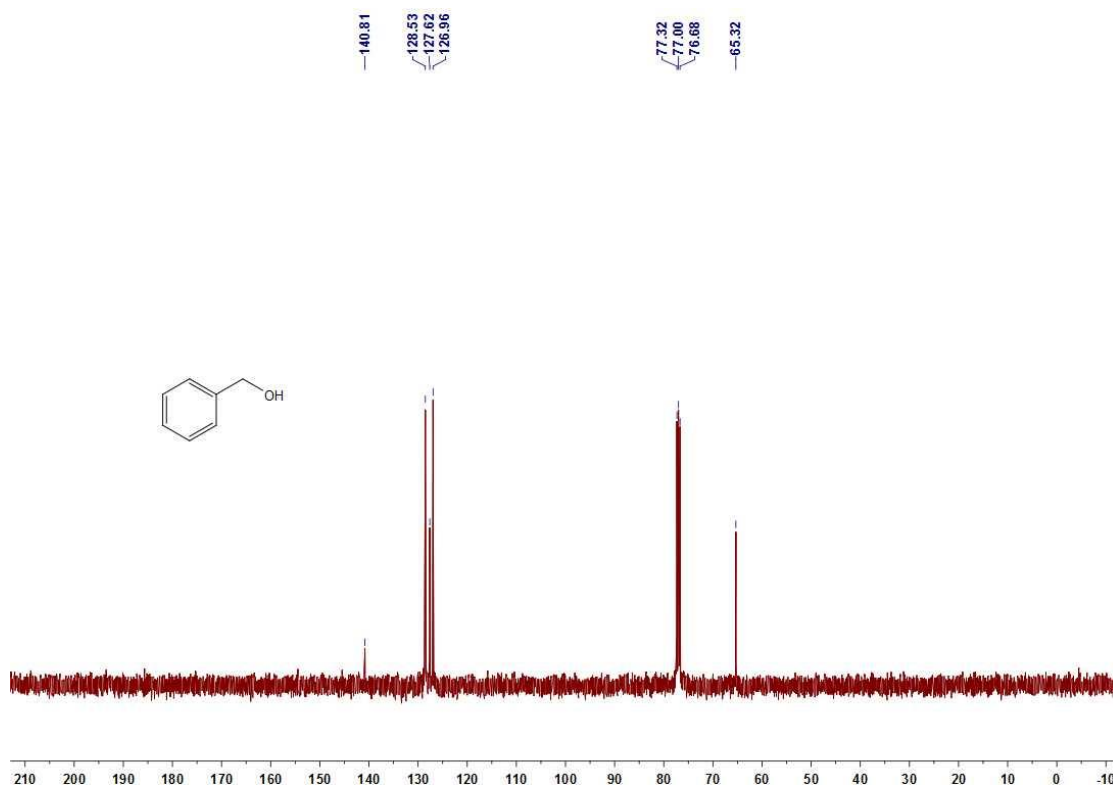

<sup>1</sup>H and <sup>13</sup>C NMR spectra of (4-methoxyphenyl)methanol

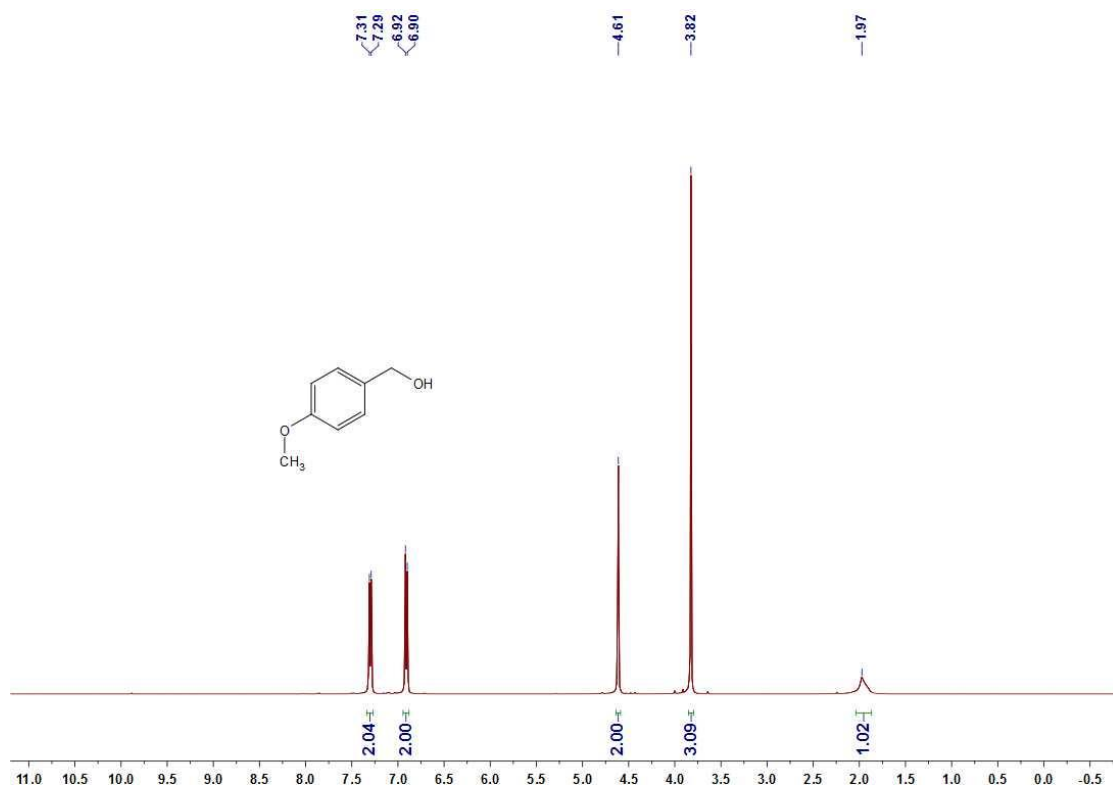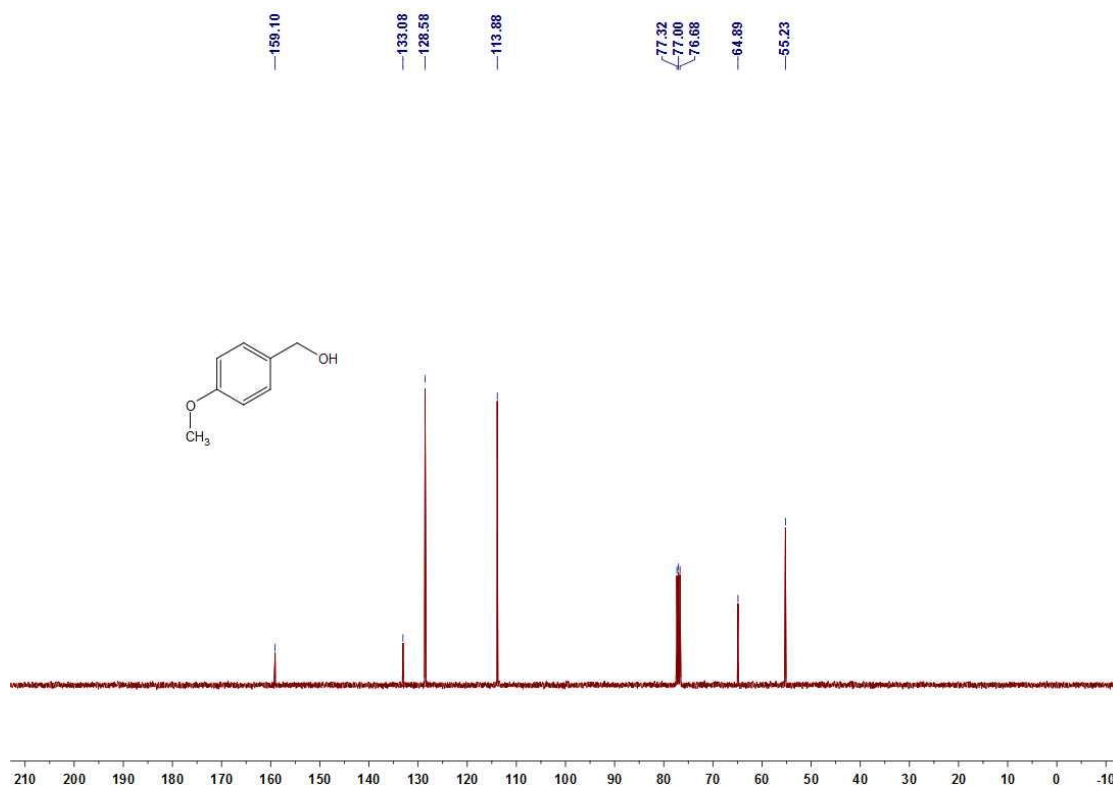

# $^1\text{H}$ and $^{13}\text{C}$ NMR spectra of (4-(trifluoromethyl)phenyl)methanol

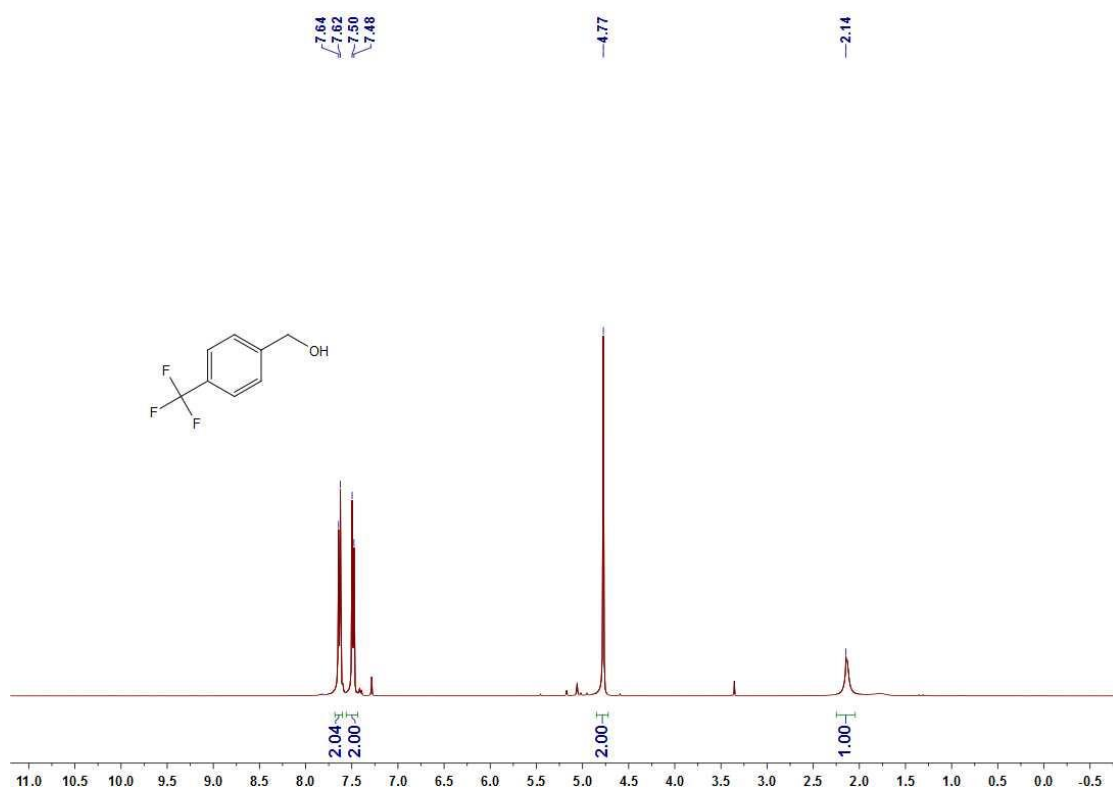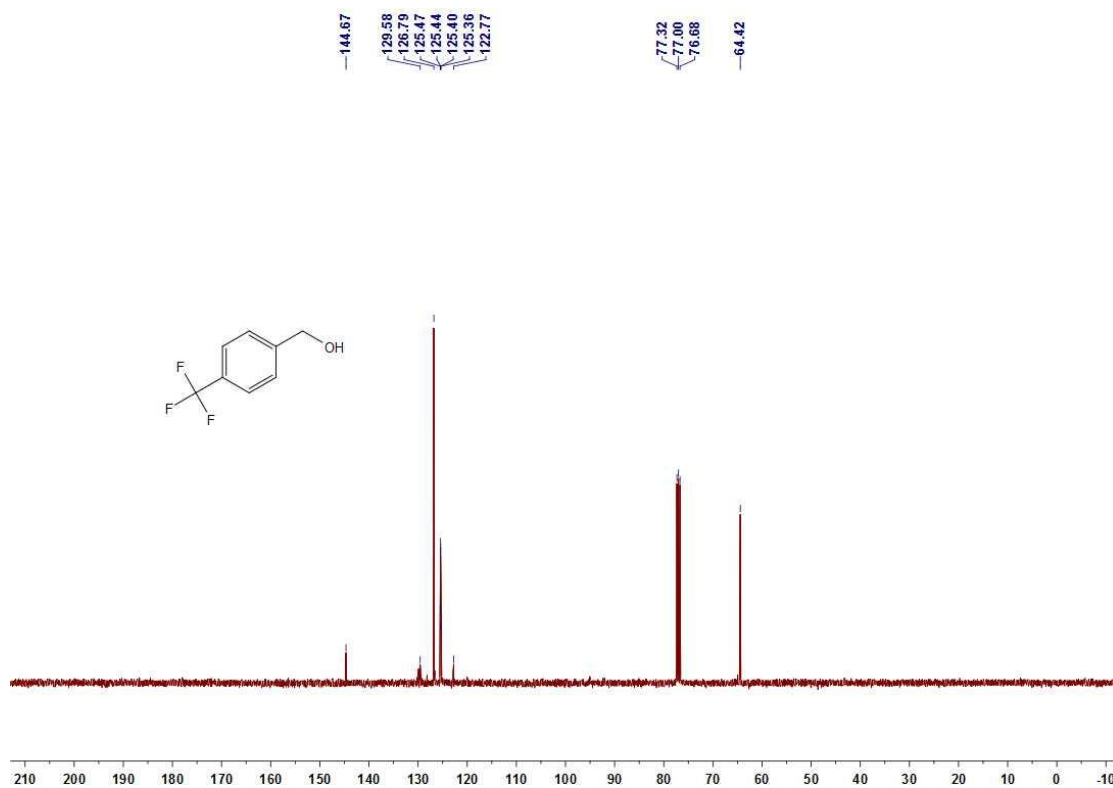

# $^1\text{H}$ and $^{13}\text{C}$ NMR spectra of (3,4-dimethoxyphenyl)methanol

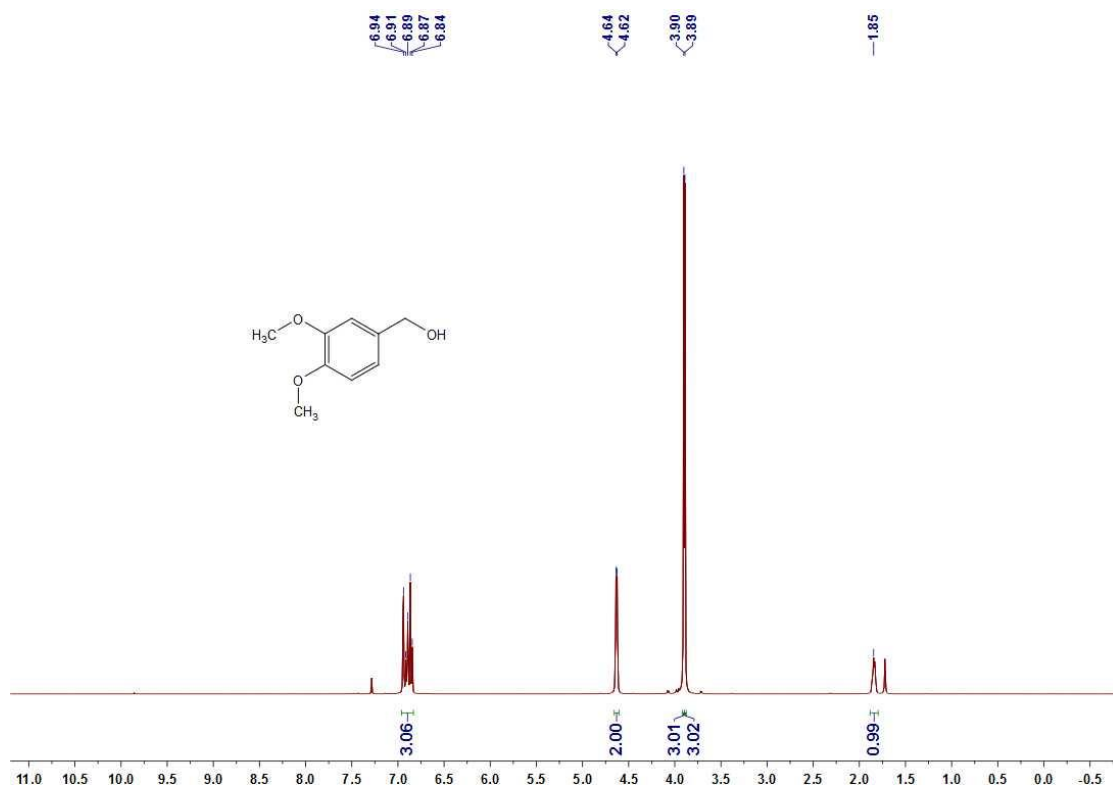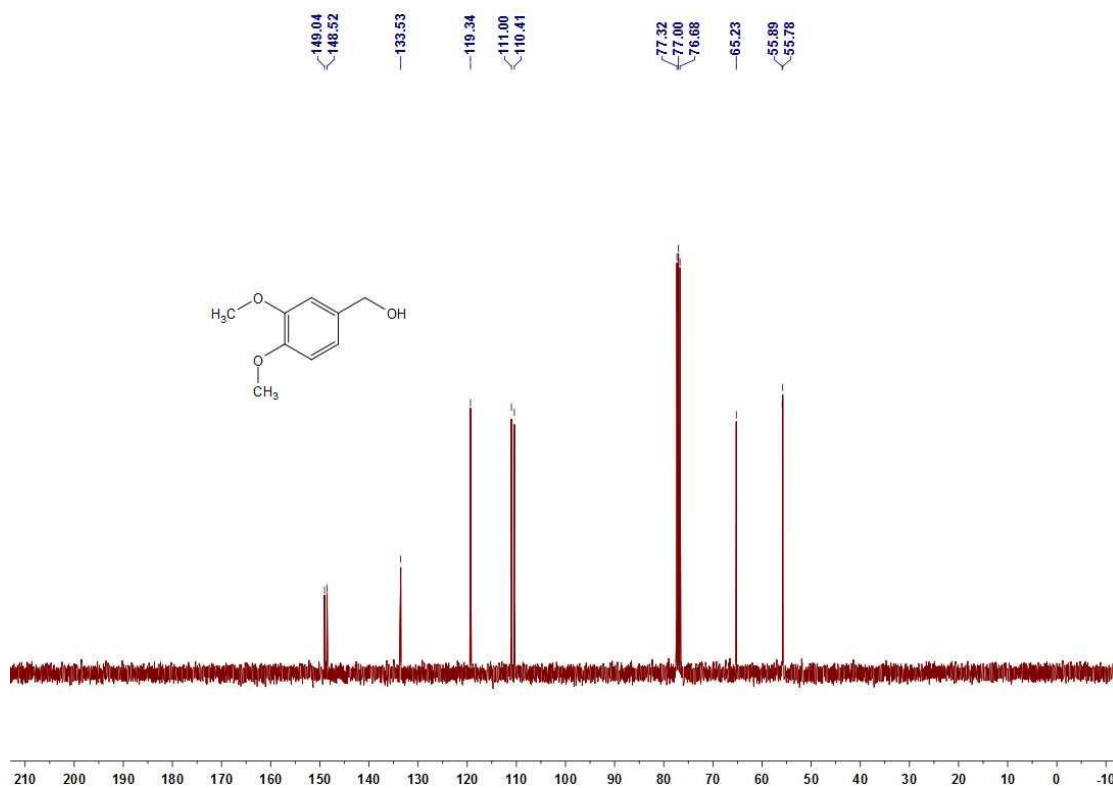

# $^1\text{H}$ and $^{13}\text{C}$ NMR spectra of naphthalen-2-ylmethanol

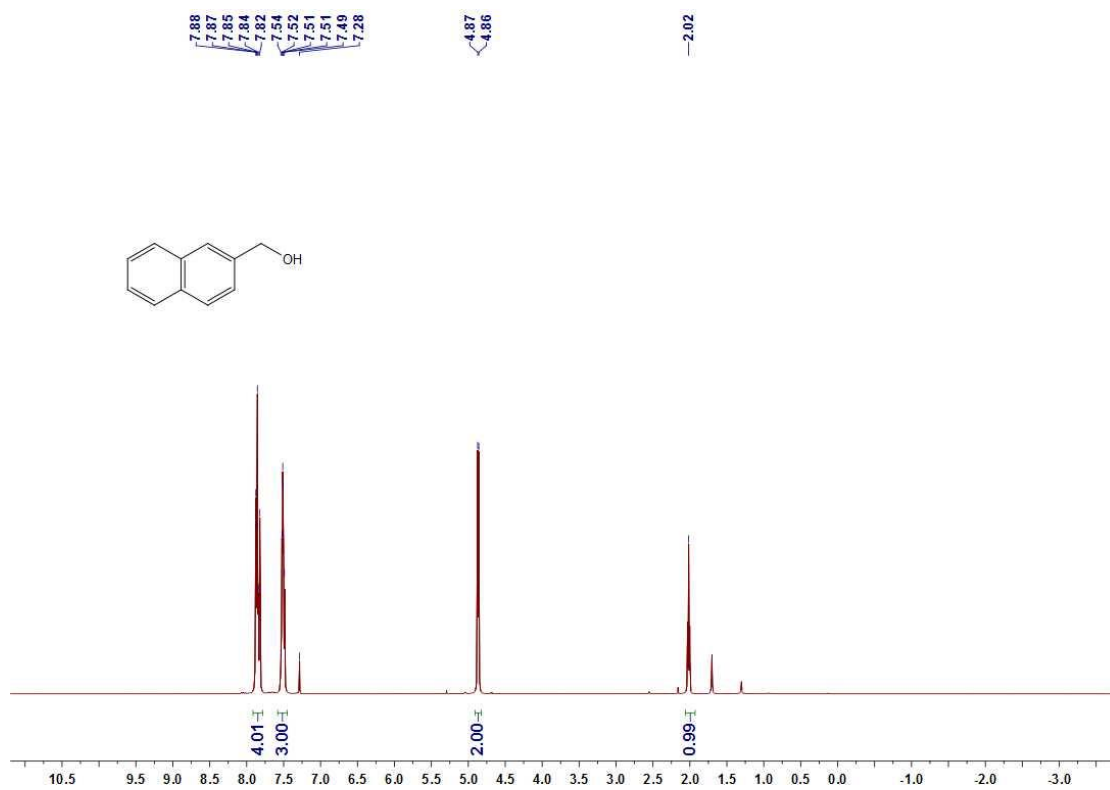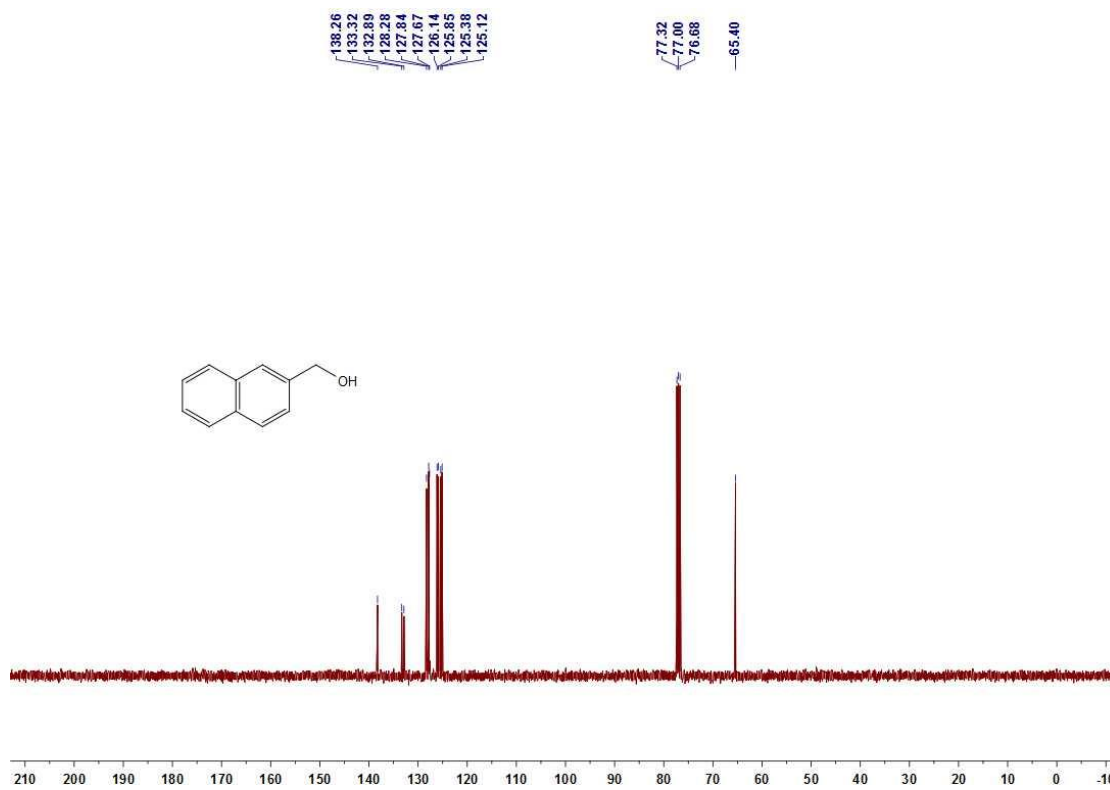

<sup>1</sup>H and <sup>13</sup>C NMR spectra of benzo[d][1,3]dioxol-5-ylmethanol

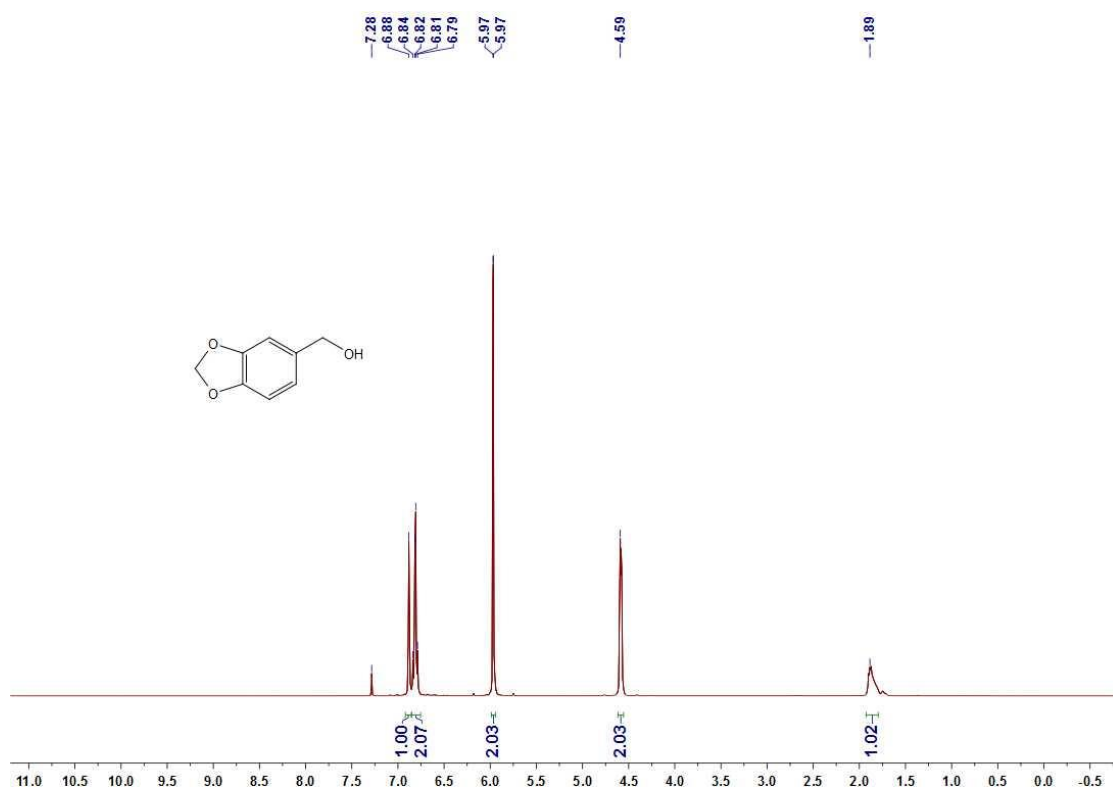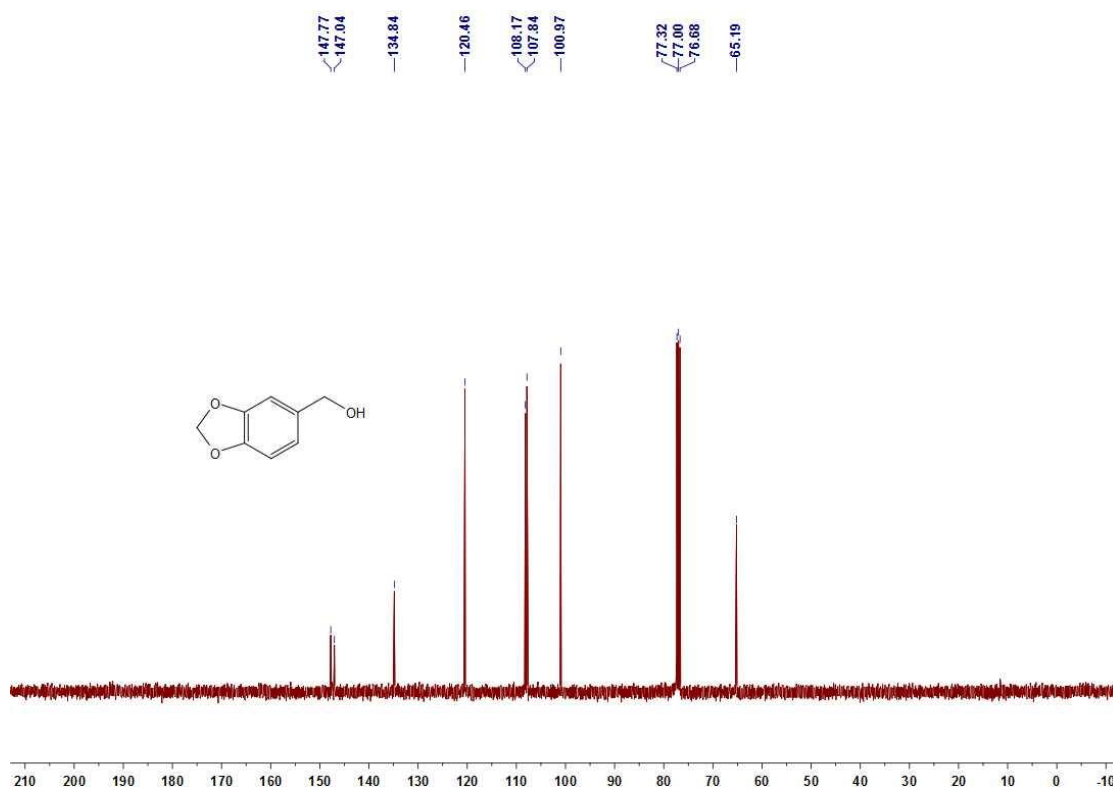

# $^1\text{H}$ and $^{13}\text{C}$ NMR spectra of benzofuran-2-ylmethanol

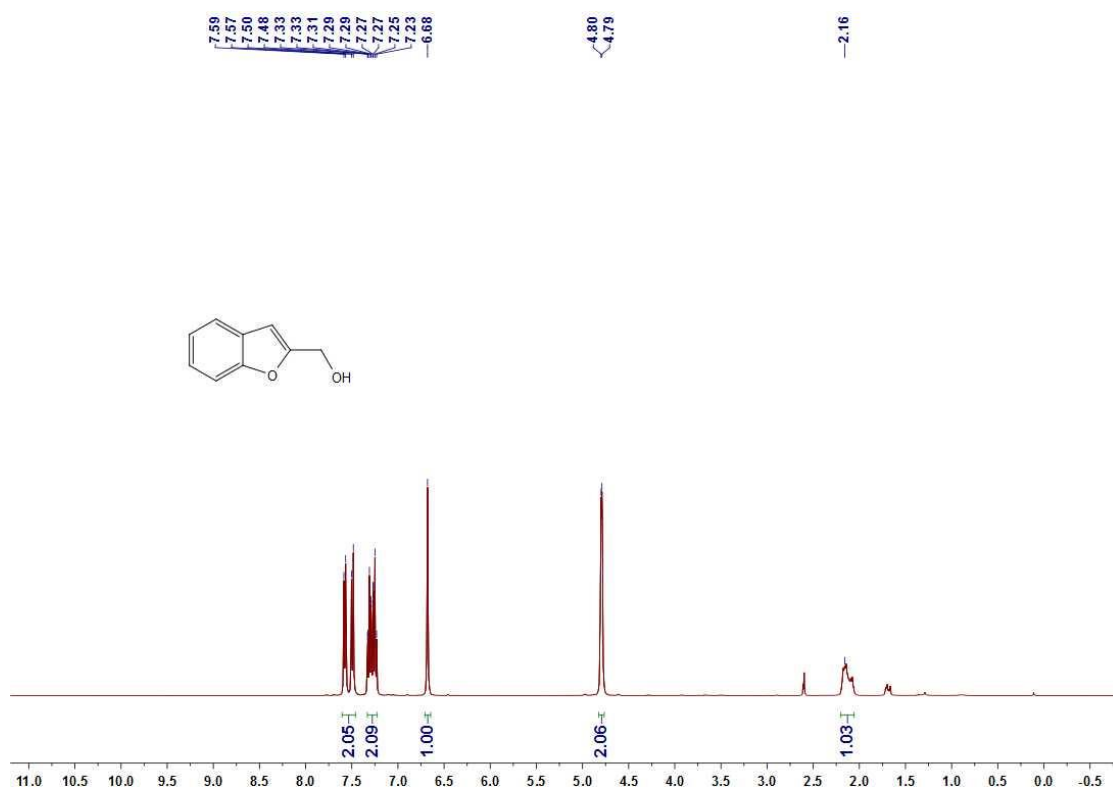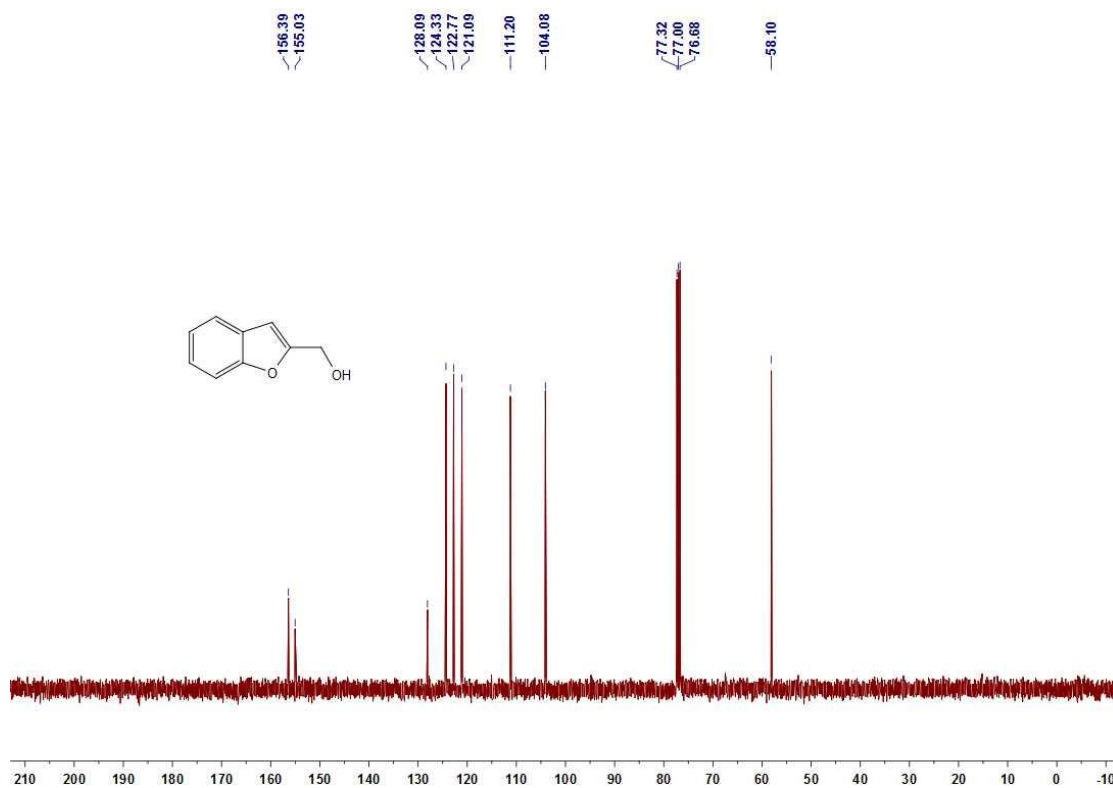



<sup>1</sup>H and <sup>13</sup>C NMR spectra of 3-phenylpropan-1-ol

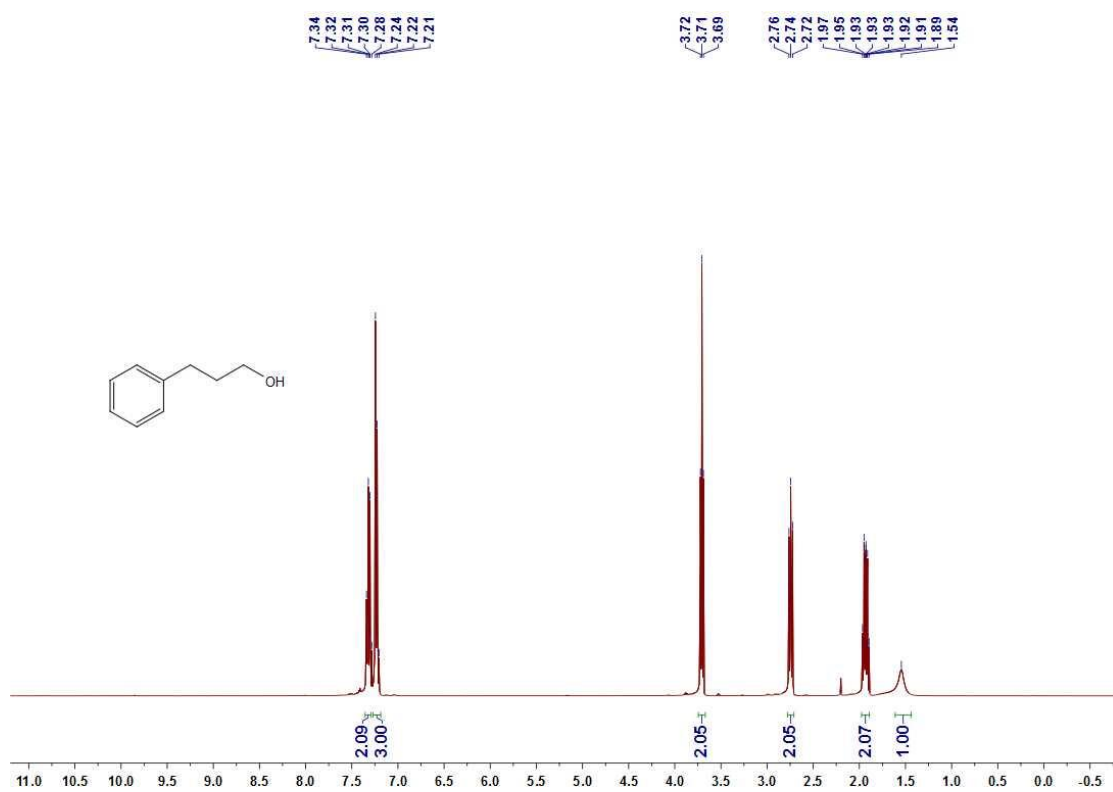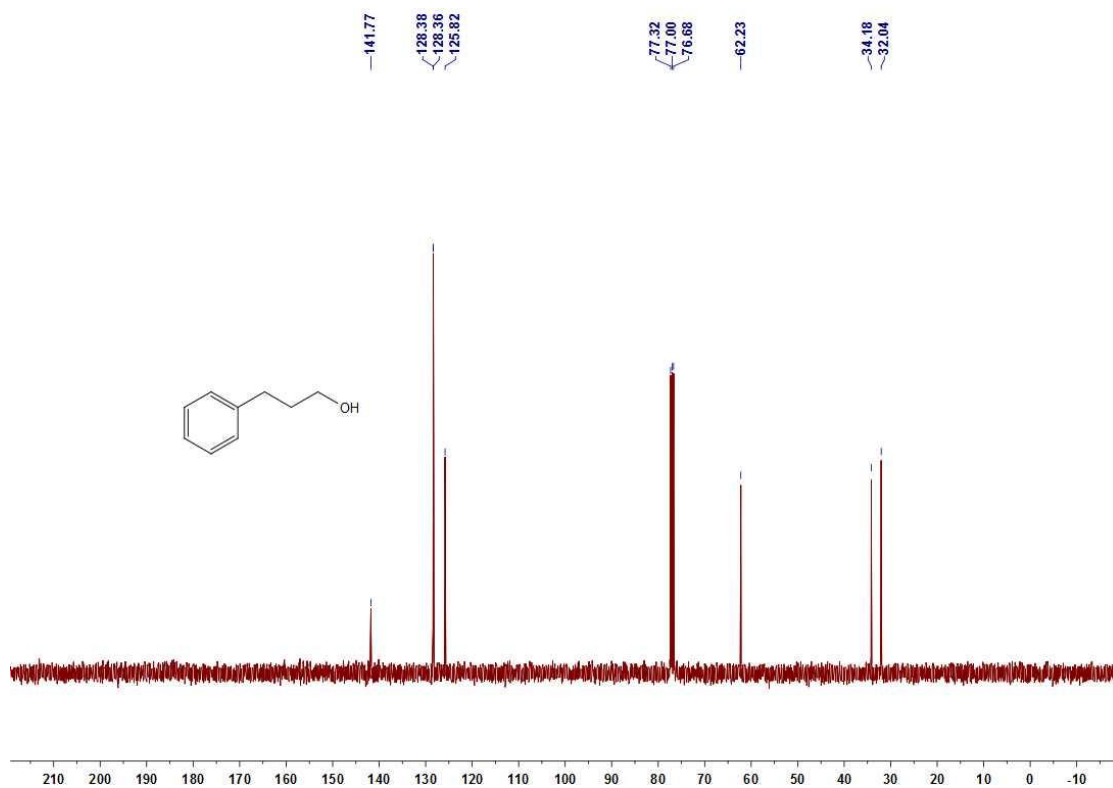

<sup>1</sup>H and <sup>13</sup>C NMR spectra of 4-(hydroxy(phenyl)methyl)-N,N-dipropylbenzenesulfonamide

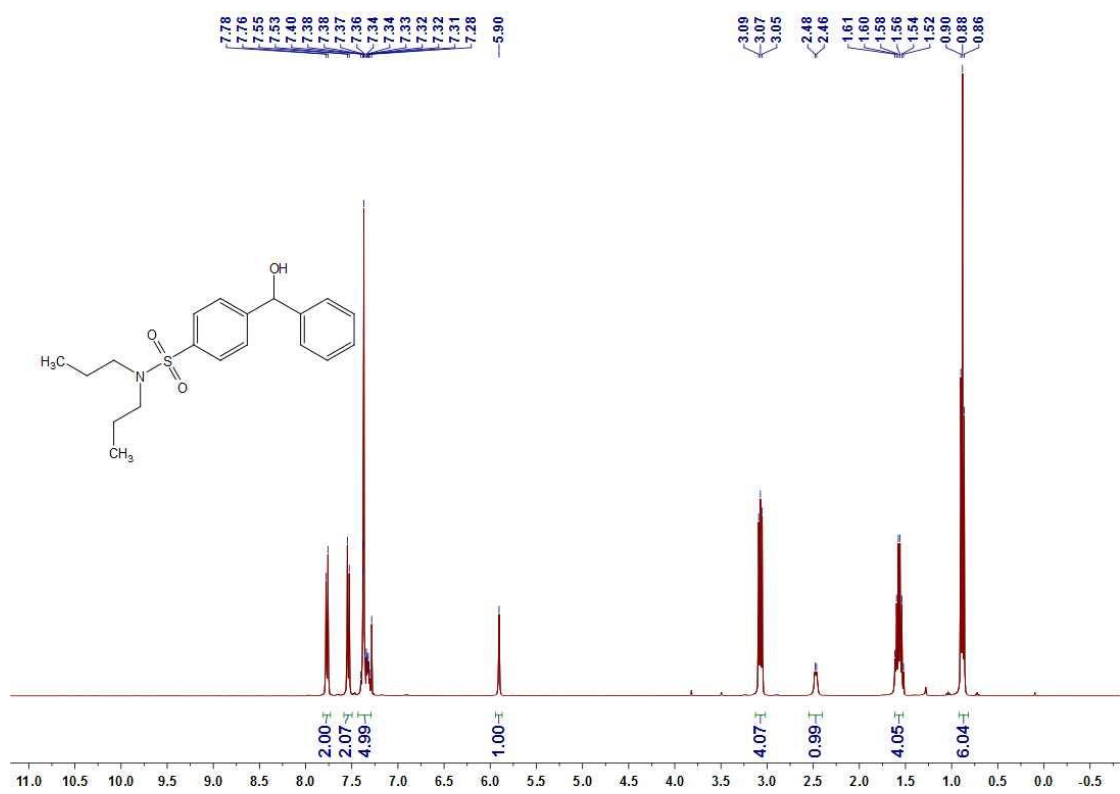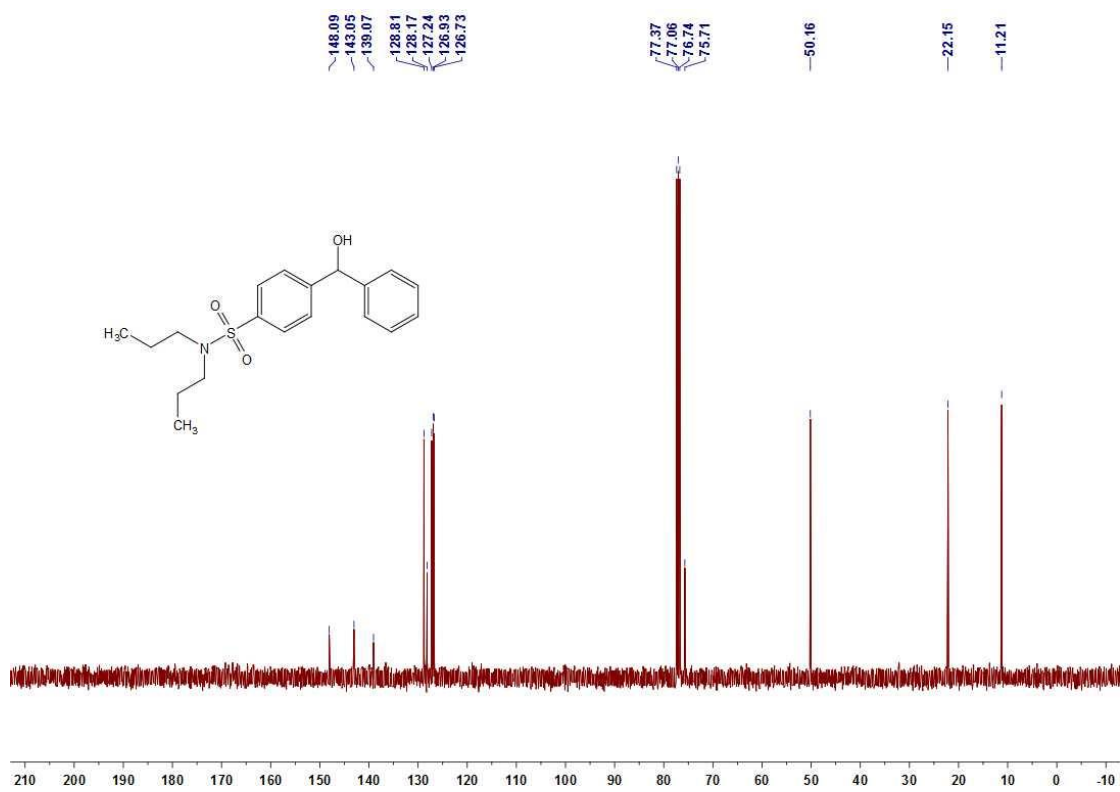

<sup>1</sup>H and <sup>13</sup>C NMR spectra of (4-methoxyphenyl)(4-phenoxyphenyl)methanol

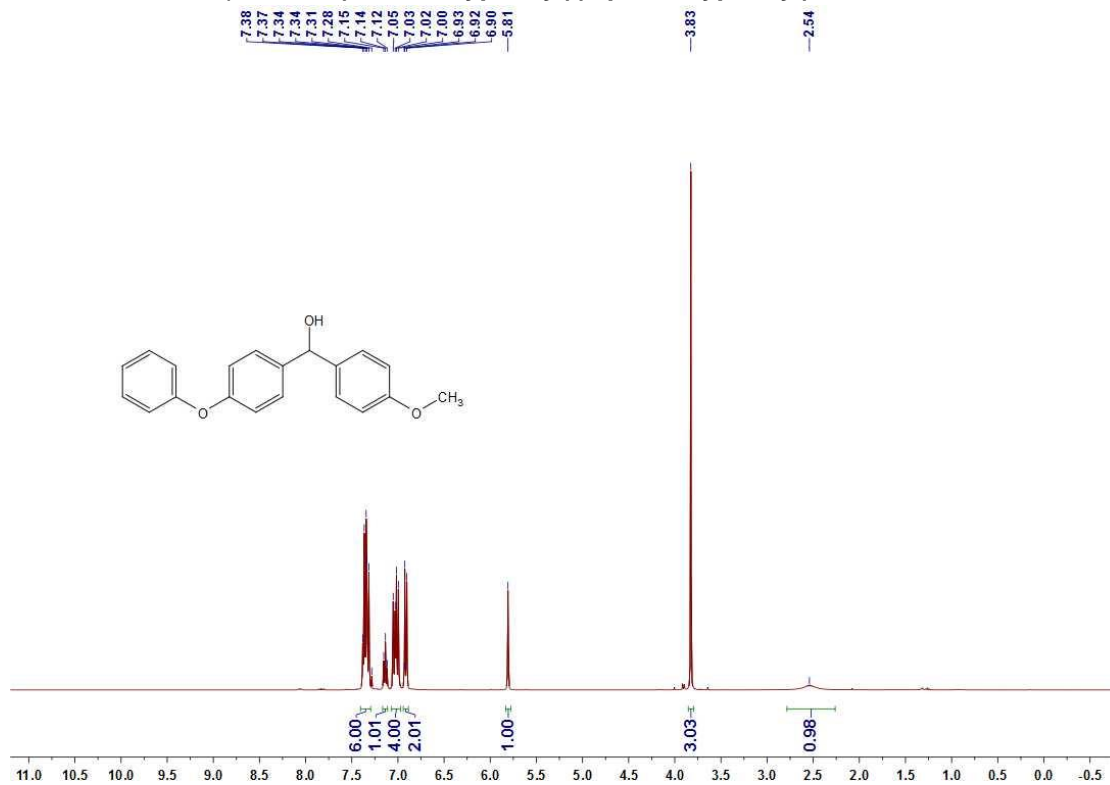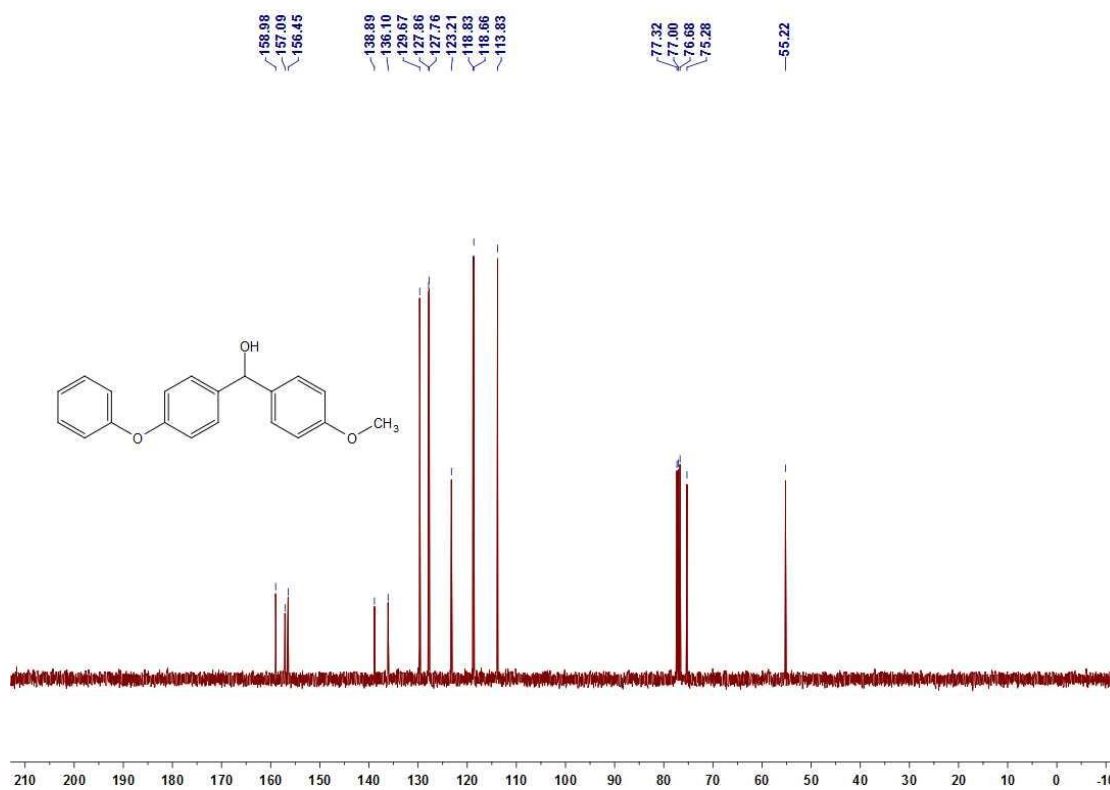

# <sup>1</sup>H and <sup>13</sup>C NMR spectra of bis(4-phenoxyphenyl)methanol

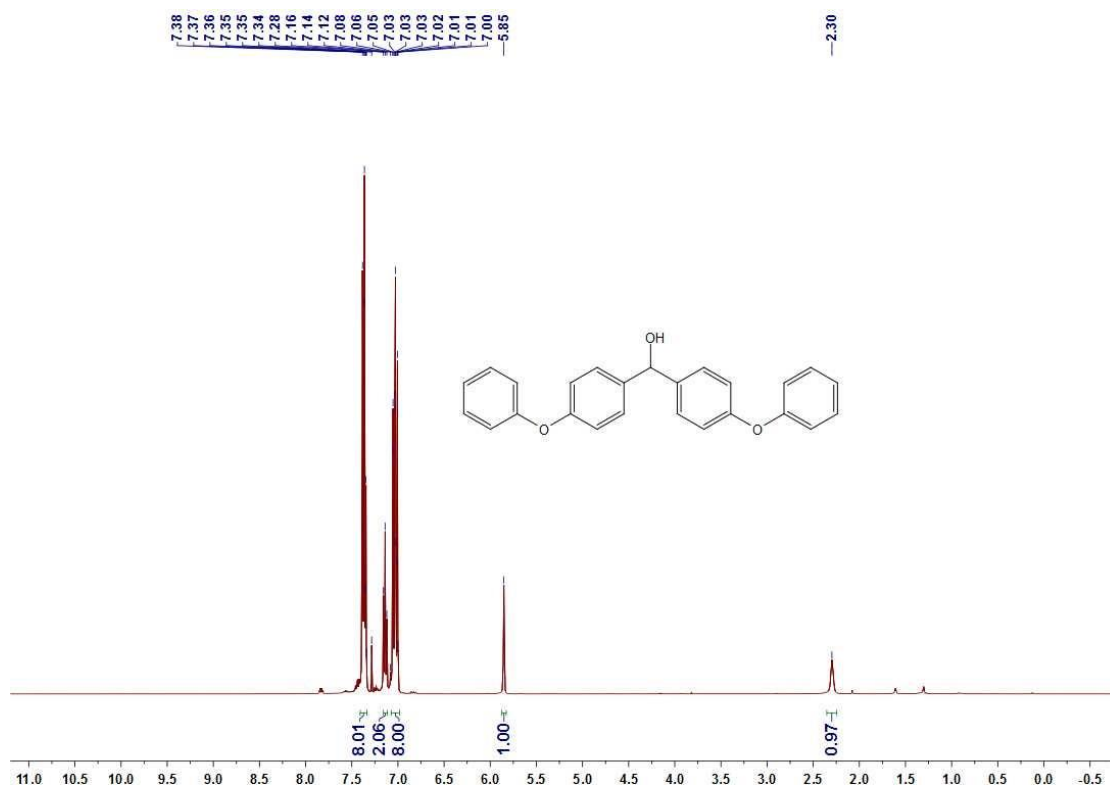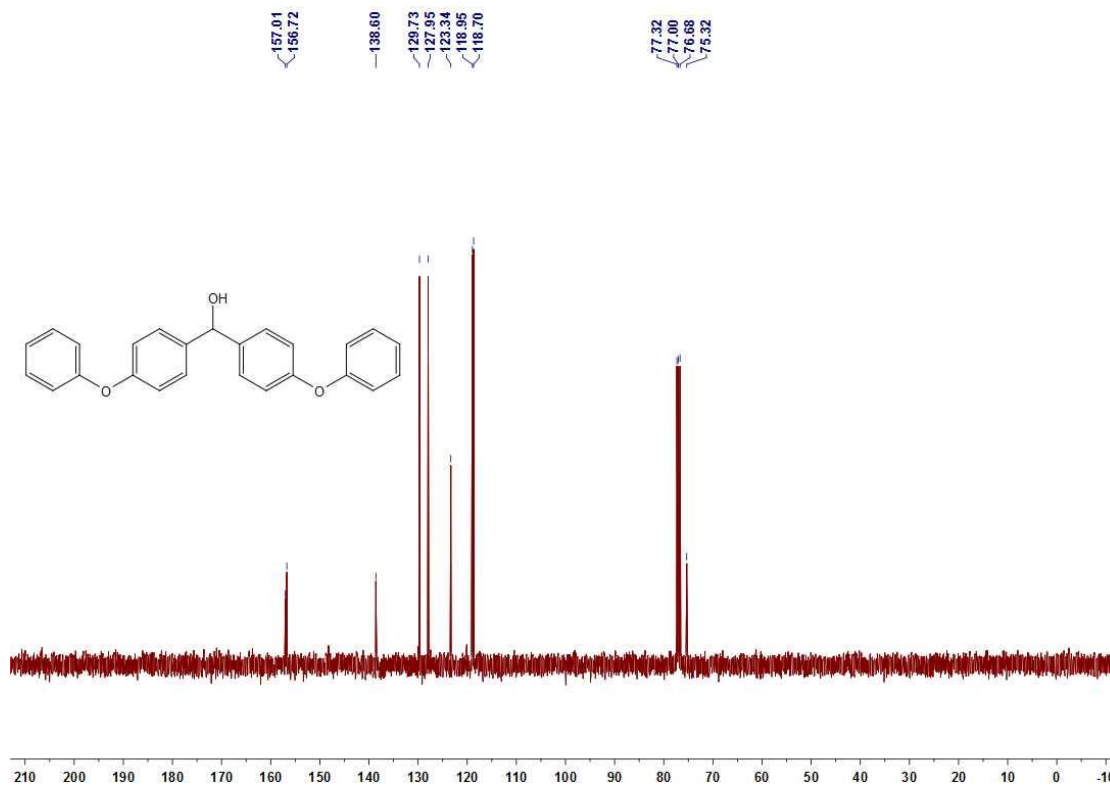

$^1\text{H}$  and  $^{13}\text{C}$  NMR spectra of compound **d-2a**

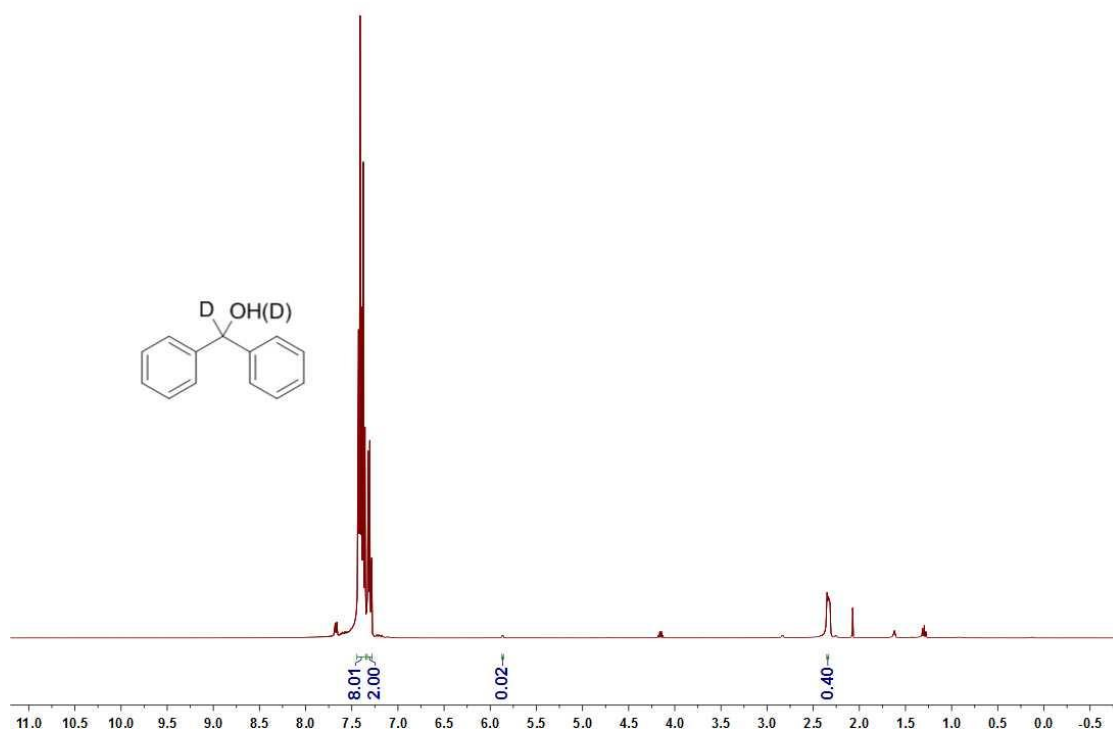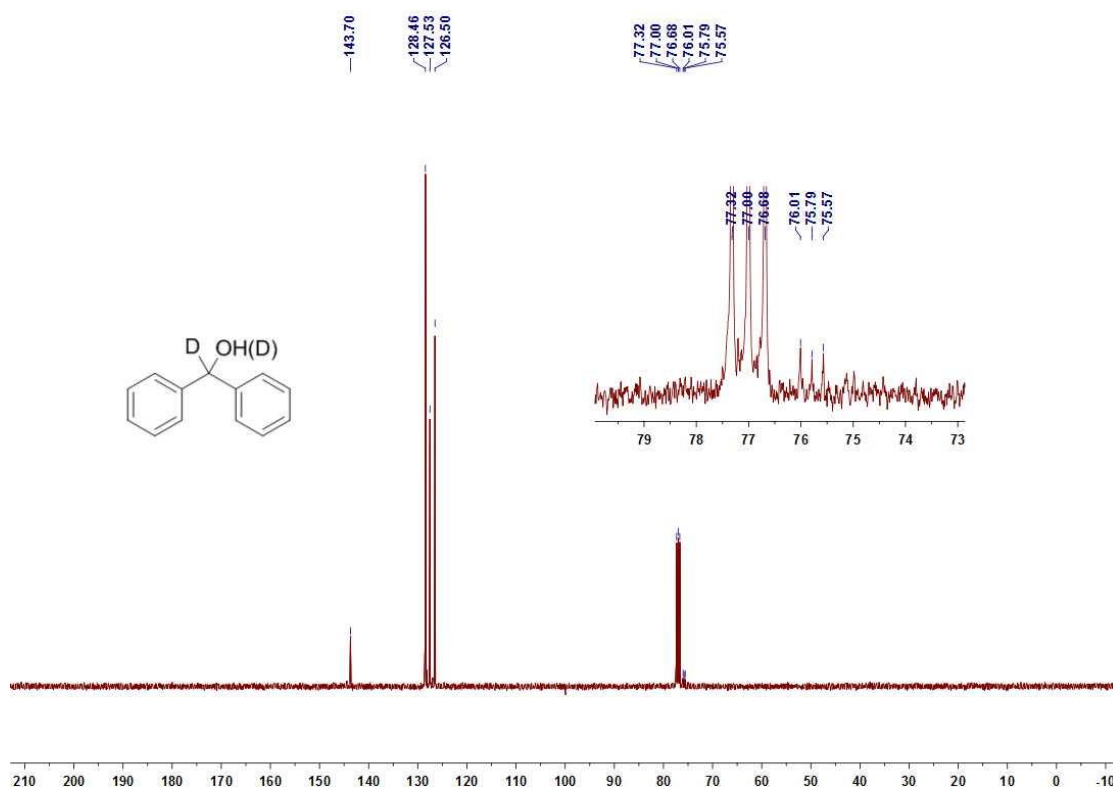

Supplement: d1gc02449c1.pdf [file d1gc02449c1.pdf]
